# Supplementary material
Source: PubMed Central journal article supplement (PMC6944468)
Supplement: NIHMS1065351-supplement-Supporting_Information.pdf [file NIHMS1065351-supplement-Supporting_Information.pdf]

In the format provided by the authors and unedited.

# Enzyme-catalysed [6+4] cycloadditions in the biosynthesis of natural products

Bo Zhang<sup>1,5</sup>, Kai Biao Wang<sup>1,5</sup>, Wen Wang<sup>1,5</sup>, Xin Wang<sup>2,5</sup>, Fang Liu<sup>2</sup>, Jiapeng Zhu<sup>3</sup>, Jing Shi<sup>1</sup>, Ling Yu Li<sup>1</sup>, Hao Han<sup>1</sup>, Kuang Xu<sup>1</sup>, Hong Yun Qiao<sup>1</sup>, Xiao Zhang<sup>2</sup>, Rui Hua Jiao<sup>1</sup>, Kendall N. Houk<sup>4\*</sup>, Yong Liang<sup>2\*</sup>, Ren Xiang Tan<sup>1,3\*</sup> & Hui Ming Ge<sup>1\*</sup>

<sup>1</sup>State Key Laboratory of Pharmaceutical Biotechnology, Institute of Functional Biomolecules, School of Life Sciences, Nanjing University, Nanjing, China. <sup>2</sup>State Key Laboratory of Coordination Chemistry, Jiangsu Key Laboratory of Advanced Organic Materials, School of Chemistry and Chemical Engineering, Nanjing University, Nanjing, China. <sup>3</sup>State Key Laboratory Cultivation Base for TCM Quality and Efficacy, School of Life Sciences and Medicine, Nanjing University of Chinese Medicine, Nanjing, China. <sup>4</sup>Department of Chemistry and Biochemistry, University of California, Los Angeles, Los Angeles, CA, USA. <sup>5</sup>These authors contributed equally: Bo Zhang, Kai Biao Wang, Wen Wang, Xin Wang. \*e-mail: [hok@chem.ucla.edu](mailto:hok@chem.ucla.edu); [yongliang@nju.edu.cn](mailto:yongliang@nju.edu.cn); [rxtan@nju.edu.cn](mailto:rxtan@nju.edu.cn); [hmge@nju.edu.cn](mailto:hmge@nju.edu.cn)

**This PDF file includes:**

**Supplementary Text**

**Supplementary Fig. 1.** Generation of the *S. seoulensis* A01 mutant strains.

**Supplementary Fig. 2.** SDS-PAGEs of the purified proteins.

**Supplementary Fig. 3a-3h.** HR-ESIMS and NMR spectra of **4**.

**Supplementary Fig. 4a-4g.** HR-ESIMS and NMR spectra of **5**.

**Supplementary Fig. 5a-5h.** HR-ESIMS and NMR spectra of **6**.

**Supplementary Fig. 6a-6f.** HR-ESIMS and NMR spectra of mixture of **6** and **7**.

**Supplementary Fig. 7a-7h.** HR-ESIMS and NMR spectra of **8**.

**Supplementary Fig. 8a-8g.** HR-ESIMS and NMR spectra of **10**.

**Supplementary Fig. 9.** Structures of NgnD and comparison with structure of  $\alpha + \beta$  barrel superfamily protein.

**Supplementary Fig. 10.** Distances between residues and the center of mass of the substrate/TS for the time between 10<sup>th</sup> and 11<sup>th</sup> ns.

**Supplementary Table 1.** Bacterial strains and plasmids.

**Supplementary Table 2.** Oligonucleotide primers used in this study.

**Supplementary Table 3.** Annotation of the *ngn* cluster.

**Supplementary Table 4.** NMR spectroscopic data of **4**.

**Supplementary Table 5.** NMR spectroscopic data of **5**.

**Supplementary Table 6.** NMR spectroscopic data of **6**.

**Supplementary Table 7.** NMR spectroscopic data of **7**.

**Supplementary Table 8.** Experimental and calculated <sup>13</sup>C NMR data for compound **7**.

**Supplementary Table 9.** NMR spectroscopic data of **8**.

**Supplementary Table 10.** NMR spectroscopic data of **10**.

**Supplementary Table 11.** Annotation of the *stmD* homologue and its neighboring genes in *N. tenerifensis* NBRC 101015.

**Supplementary Table 12.** Annotation of the *stmD* homologue and its neighboring genes in *S. tsukubaensis* F601.

**Supplementary Table 13.** Annotation of the *stmD* homologue and its neighboring genes in *S. sp.* Root369.

**Supplementary Data 1.** DFT-computed energies and Cartesian coordinates.

**References**

## Supplementary Text

**General experimental procedures.** All NMR spectra were acquired on Bruker Avance 600 at 600 MHz for  $^1\text{H}$  and 150 MHz for  $^{13}\text{C}$  or AvanceIII 400 at 400 MHz for  $^1\text{H}$  and 100 MHz for  $^{13}\text{C}$ . High resolution LC-MS analysis was conducted on an Agilent 6530 TOF LC-MS spectrometer with a Porshell 120 (EC-C18 column,  $4.5 \times 50$  mm,  $2.7 \mu\text{m}$ , Agilent Technologies). X-ray crystallographic data was obtained on a Bruker Smart APEXIII single crystal diffractometer. Analytical HPLC was performed on an Agilent 1260 HPLC system with a DAD detector equipped with a Porshell 120 (EC-C18,  $4.5 \times 50$  mm,  $2.7 \mu\text{m}$ , Agilent Technologies). UV absorbance was measured on a NanoDrop 2000c spectrometer (Thermo Technology). Biochemicals and media were purchased from Sinopharm Chemical (China), Oxoid (UK) or Sigma-Aldrich (USA). Chemical reagents were purchased from standard commercial sources including J&K (China), Sigma- Aldrich (USA), Merck (Germany).

### Physical data of isolated compounds

Compound **4**, yellow amorphous oil, UV(MeOH):  $\lambda_{\text{max}}$  ( $\log\epsilon$ ) = 229 nm (0.759), 296 nm (0.866); IR (KBr)  $\nu_{\text{max}}$  3303, 2962, 2932, 2874, 1622, 1589, 1532, 1395, 1007, 973  $\text{cm}^{-1}$ ; HR-ESIMS (positive mode):  $m/z$  calcd. for  $\text{C}_{21}\text{H}_{31}\text{O}_5\text{Na}_2$ : 409.1967, found 409.1965  $[\text{M}-\text{H}+2\text{Na}]^+$ .  $^1\text{H}$  and  $^{13}\text{C}$  NMR data see **Supplementary Table 4**.

Compound **5**, yellow amorphous oil, UV(MeOH):  $\lambda_{\text{max}}$  ( $\log\epsilon$ ) = 234 nm (0.298), 293 nm (0.417); IR (KBr)  $\nu_{\text{max}}$  3359, 2927, 1690, 1615, 1396, 1303, 1242, 1140, 1061, 1007, 969  $\text{cm}^{-1}$ ; HR-ESIMS (positive mode):  $m/z$  calcd. for  $\text{C}_{21}\text{H}_{32}\text{O}_6\text{Na}$ : 403.2097, found 403.2096  $[\text{M}+\text{Na}]^+$ .  $^1\text{H}$  and  $^{13}\text{C}$  NMR data see **Supplementary Table 5**.

Compound **6**, colorless needle, UV(MeOH):  $\lambda_{\text{max}}$  ( $\log\epsilon$ ) = 218 nm (0.96), 222 nm (0.7); IR (KBr)  $\nu_{\text{max}}$  3380, 2944, 2832, 1449, 1115, 1033, 670  $\text{cm}^{-1}$ ; HR-ESIMS (positive mode):  $m/z$  calcd. for  $\text{C}_{21}\text{H}_{30}\text{O}_4\text{Na}$ : 369.2042, found 369.2041  $[\text{M}+\text{Na}]^+$ .  $^1\text{H}$  and  $^{13}\text{C}$  NMR data see **Supplementary Table 6**.

Compound **7**, HR-ESIMS (positive mode):  $m/z$  calcd. for  $\text{C}_{21}\text{H}_{30}\text{O}_4\text{Na}$ : 369.2042, found 369.2037  $[\text{M}+\text{Na}]^+$ .  $^1\text{H}$  and  $^{13}\text{C}$  NMR data see **Supplementary Table 7**.

Compound **8**, colorless needle, UV(MeOH):  $\lambda_{\text{max}}$  ( $\log\epsilon$ ) = 206 nm (0.25), 218 nm (0.75); HR-ESIMS (positive mode):  $m/z$  calcd. for  $\text{C}_{21}\text{H}_{30}\text{O}_4\text{Na}$ : 369.2042, found 369.2043  $[\text{M}+\text{Na}]^+$ .  $^1\text{H}$  and  $^{13}\text{C}$  NMR data see **Supplementary Table 9**.

Compound **10**, yellow amorphous oil, UV(MeOH):  $\lambda_{\text{max}}$  ( $\log\epsilon$ ) = 234 nm (0.21), 275 nm (0.31), 327 nm (0.22); IR (KBr)  $\nu_{\text{max}}$  3385, 3181, 2970, 2937, 2881, 1729, 1675, 1531, 1457, 1386, 1255, 1203  $\text{cm}^{-1}$ ; HR-ESIMS (positive mode):  $m/z$  calcd. for  $\text{C}_{25}\text{H}_{39}\text{NO}_5\text{SNa}$ : 488.2447, found 488.2440  $[\text{M}+\text{Na}]^+$ .  $^1\text{H}$  and  $^{13}\text{C}$  NMR data see **Supplementary Table 10**.

### Crystal data of compounds 6 and 8

**Crystal Data** for compound **6**,  $\text{C}_{21}\text{H}_{30}\text{O}_4$  ( $M = 346.45$  g/mol): monoclinic, space group P21 (no. 4),  $a = 7.1821(12)$  Å,  $b = 10.1451(17)$  Å,  $c = 12.471(2)$  Å,  $\alpha = 90^\circ$ ,  $\beta = 97.763(5)^\circ$ ,  $\gamma = 90^\circ$ ,  $V = 900.4(3)$  Å<sup>3</sup>,  $Z = 2$ ,  $T = 153$  K,  $\mu(\text{CuK}\alpha) = 0.087$   $\text{mm}^{-1}$ ,  $D_{\text{calc}} = 1.278$   $\text{g}/\text{cm}^3$ ,  $F(000) = 376$ ; 5600 reflections measured ( $5.196^\circ \leq 2\theta \leq 50.014^\circ$ ), 2845 unique ( $R_{\text{int}} = 0.051$ ,  $R_{\text{sigma}} = 0.0644$ ) which were used in all calculations. The final  $R_1$  was 0.0391 ( $I > 2\sigma(I)$ ) and  $wR_2$  was 0.1137 (all

data); The crystallographic data have been deposited in the Cambridge Crystallographic Data Centre as CCDC 1843311.

**Crystal Data** for compound **8**, C<sub>21</sub>H<sub>30</sub>O<sub>4</sub> (*M* = 346.45 g/mol): triclinic, space group P1 (no. 1), *a* = 6.9357(11) Å, *b* = 8.1669(15) Å, *c* = 8.4498(13) Å,  $\alpha$  = 84.343(5)°,  $\beta$  = 87.877(4)°,  $\gamma$  = 79.868(3)°, *V* = 468.77(13) Å<sup>3</sup>, *Z* = 1, *T* = 153 K,  $\mu(\text{CuK}\alpha)$  = 0.083 mm<sup>-1</sup>, *D*<sub>calc</sub> = 1.227 g/cm<sup>3</sup>, *F*(000) = 188; 3277 reflections measured (4.846° ≤ 2 $\Theta$  ≤ 50.012°), 2263 unique (*R*<sub>int</sub> = 0.0434, *R*<sub>sigma</sub> = 0.0739) which were used in all calculations. The final *R*<sub>1</sub> was 0.0457 (*I* > 2 $\sigma$ (*I*)) and *wR*<sub>2</sub> was 0.1226 (all data); The crystallographic data have been deposited in the Cambridge Crystallographic Data Centre as CCDC 1843314.

**Computational details.** The DFT calculations were performed with the Gaussian 09 program package<sup>37</sup>. The procedure starts with a preliminary conformation search with molecular mechanics (MM). Schrödinger Maestro 9.8 and AMBER were used for MM calculations. We used the force field OPLS\_2005, GB/SA solvent model for water, and the mixed torsional/low-mode sampling method that was built in the program. For the transition structures, we constrained the forming C-C bonds to around 2.2 Å by setting corresponding very high bond stretching force constants. The low-energy conformers that are within 5 kcal/mol of the global minimum were saved and then optimized with DFT in Gaussian 09. The geometry optimizations of minima and transition states involved were carried out at the B3LYP-D3 level of theory<sup>38</sup> with the 6-31G(d) basis set. The vibrational frequencies were computed at the same level to check whether each optimized structure is an energy minimum or a transition state and to evaluate its zero-point vibration energy (ZPVE) and thermal corrections at 298 K. The conformer with lowest energy was presented in the text. For a transition structure, we consider the lowest conformer with one negative normal-mode force constant for the desired vibration is the transition structure that we describe in more detail. Solvation energies were computed at the M06-2X level of theory<sup>39</sup> with the 6-311+G(d,p) basis set using the gas-phase optimized structures and the CPCM model<sup>40,41</sup> in water. NMR chemical shift calculations were performed with B3LYP/6-311+G(2d,p) in acetonitrile using the CPCM model on the QM-optimized structures. Quasi-classical molecular dynamics simulations on a B3LYP-D3/6-31G(d) energy surface were initiated in the region of the potential energy surface near **TS-1** or **TS-3**. Each real normal mode of **TS-1** or **TS-3** was given its zero-point energy (ZPE) plus a Boltzmann sampling of the thermal energy available at 298 K with a random phase. The trajectories were integrated in time (the step length for integration was 1 fs) in both the forward and backward directions until either the [6+4] or [4+2] adduct was formed or reactant **3** was reformed. We started with the monomer structure of NgnD and performed molecular dynamics (MD) simulations on the protein in water for 15 ns, which is long enough for equilibration. We found that the size of the pocket (potential active site) reaches its largest at 11 ns, so we took the structure at the end of 11 ns and docked in the DFT-optimized structures of reactant **3** or transition state **TS-1**. For the reaction in enzyme, the substrate or TS were docked into the enzyme active site using AutoDock Vina<sup>42</sup>. The binding mode that ranks best in each case was then used as a starting point for subsequent MD simulations. The docking structures were solvated in a water box using AmberTools 16<sup>43</sup>. Separate ensembles of substrates were constructed by carrying out classical MD equilibrations in NgnD using MM for environment. Classical MD was performed using Amber 16 on the reactant and the transition state for 11 ns in NgnD. The molecular models constructed in the first step (water boxes and docked protein complexes) were used for MD simulations with RESP<sup>44</sup> charges

assigned on substrate and TS. The FF99SBildn<sup>45</sup> force field was used for protein residues. General Amber Force Field (GAFF)<sup>46</sup> was used for reactant and transition structures. In the enzyme, the system was minimized for 20000 steps, and gradually heated to 300 K and then equilibrated for 100 ps under constant T and P. Production run was conducted for 11 ns under constant volume and temperature. During the classical MD on the TS, restraining potentials of 200 kcal/mol/Å<sup>2</sup> were applied to the reaction coordinates in the TS. In each case, 10 residues are found to be close to the substrate/TS (**Fig. 3c**). Then, we analyzed the distances between these residues and the center of mass of the substrate/TS for the time between 10<sup>th</sup> and 11<sup>th</sup> ns (**Supplementary Fig. 10**). Snapshots (typically 2500) of reactant or TS were sampled from last 1 ns production MD runs at 400 fs intervals in NgnD.

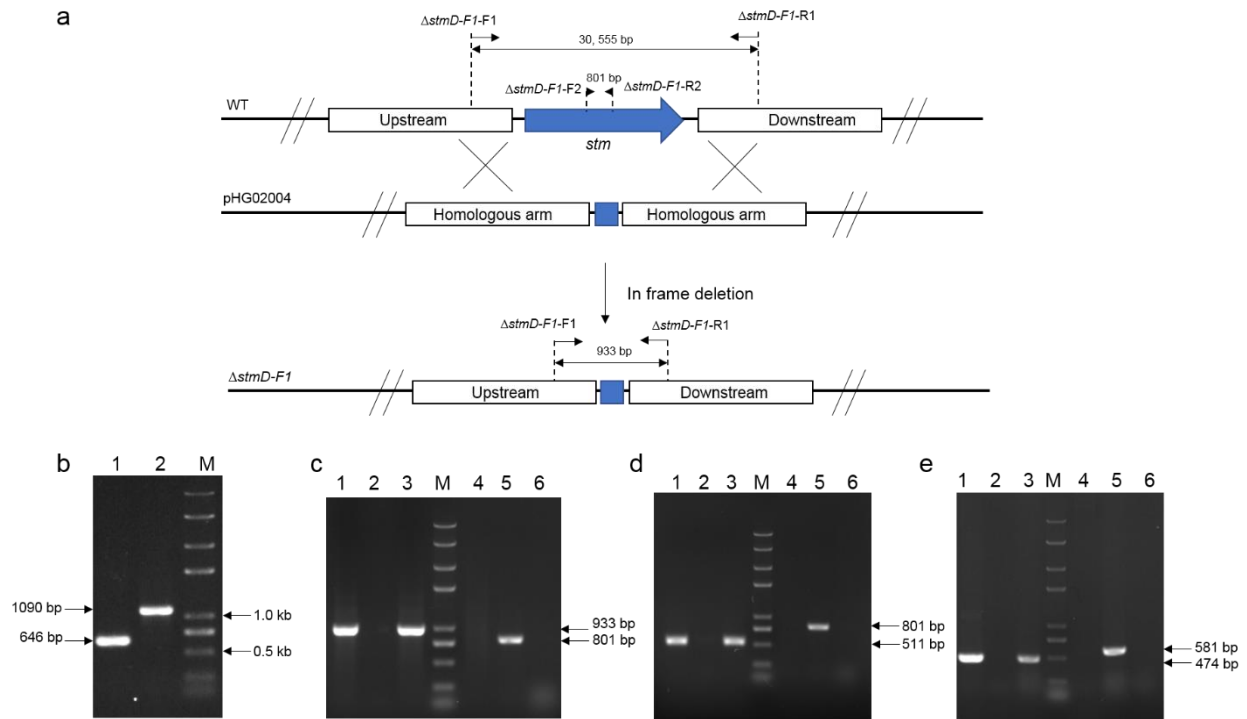

**Supplementary Fig. 1.** Generation of the *S. seoulensis* A01 mutant strains. (a) Construction of in frame deletion of *stmD-stmF1* in *S. seoulensis* A01 strain. Two homologous are joined together through a scar of target gene. The genotype of each mutant is confirmed by PCR amplification using the genomic DNA from the mutant or wild type strain as the template and the size of predicted fragments are indicated. For large fragments deletion, two pair of primers were used for genotype confirmation. (b) The *S. seoulensis* HG02001 mutant ( $\Delta stmD$ ). Lane 1, HG02001 mutant; Lane 2, *S. seoulensis* A01; Lane M, *Trans2K*<sup>®</sup> Plus II DNA marker; (c) The *S. seoulensis* HG02005 mutant ( $\Delta stmD-stmF1$ ). (d) The *S. seoulensis* HG02006 mutant ( $\Delta stmY-stmF1$ ). (e) The *S. seoulensis* HG02004 mutant ( $\Delta stmA$ ). Lane 1 and 4, each mutant strain; Lane 2 and 5, *S. seoulensis* A01 as negative control; Lane 3 and 6, each plasmid used for gene deletion as positive control, Lane M, *Trans2K*<sup>®</sup> Plus II DNA marker.; Lane 1-3 all amplified by the screen-F1/R1 primers, product of which is too large to be amplified in WT strain. Lane 4-6 all amplified by the screen-F2/R2 primers, product of which is located in the deletion region and cannot be amplified in mutant strain and plasmid. All these screening experiments were repeated independently to identify at least three desired mutants and the fermentation results of each individual mutant are similar.

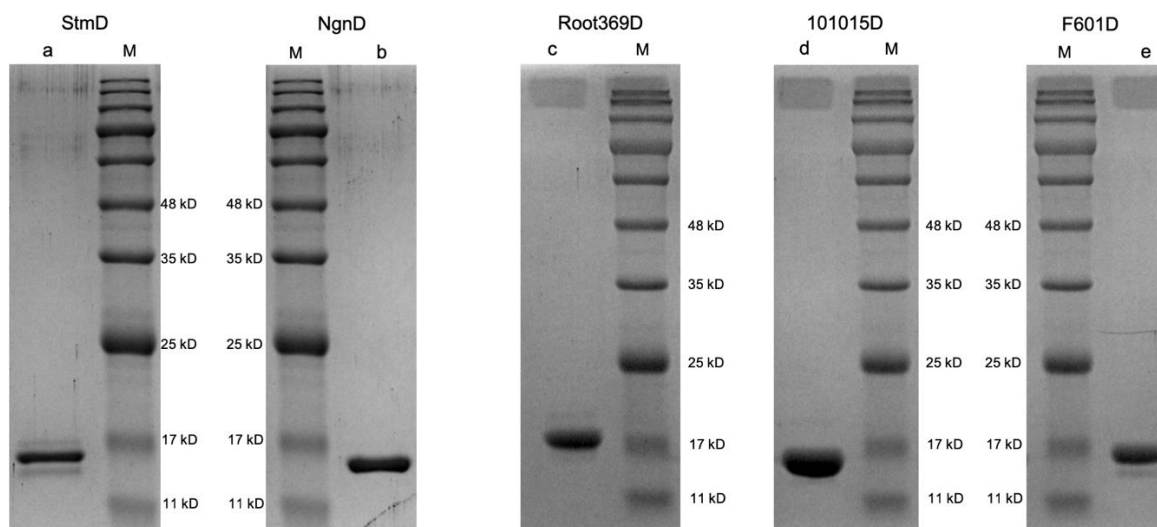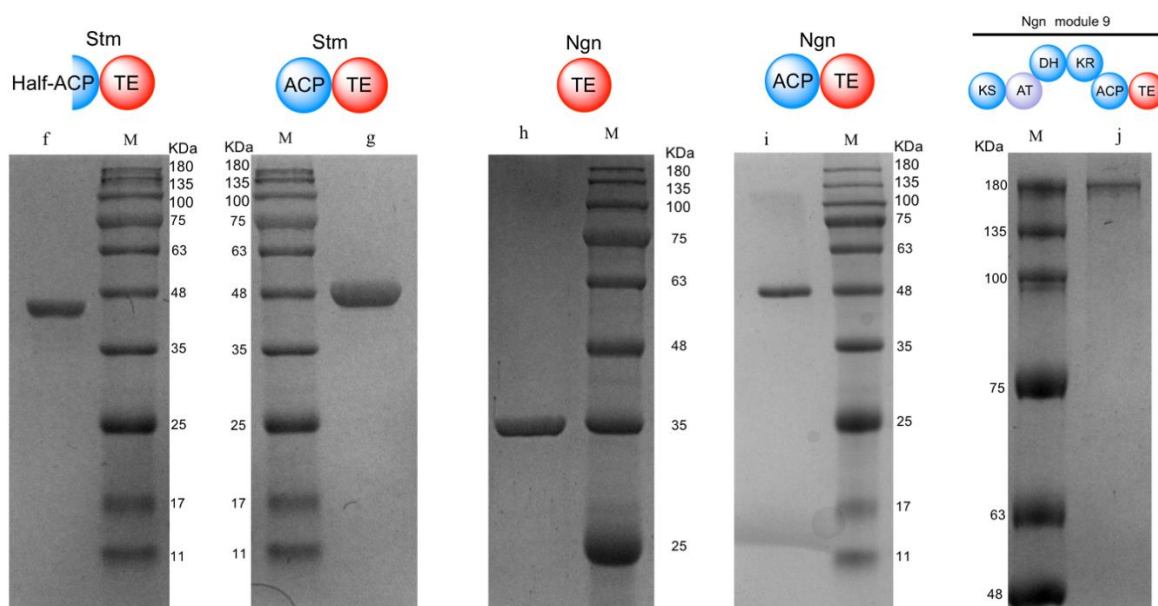

**Supplementary Fig. 2.** SDS-PAGEs of the purified proteins. (a) StmD (16.6 kDa). (b) NgnD (16.6 kDa). (c) Root369D (16.6 kDa), (d) 101015D (16.7 kDa), (e) F601D (16.9 kDa), (f) StmC/half-ACP-TE (36.1 kDa), (g) StmC/ACP-TE (38.1 kDa), (h) NgnC/TE (33.9 kDa), (i) NgnC/ACP-TE (39.4 kDa), (j) NgnC/module9-TE (208.5 kDa). M, protein ladder. The expression and purification of these proteins were repeated independently at least twice with similar results.

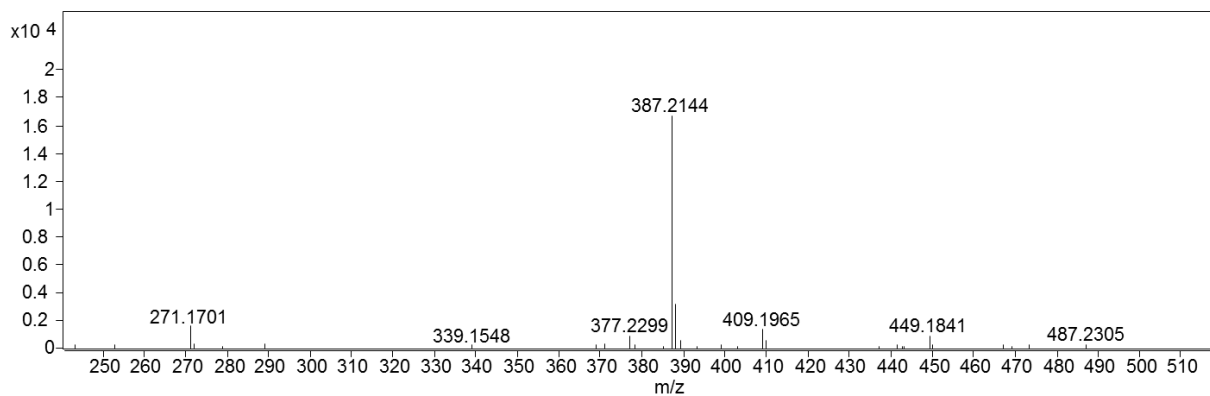

**Supplementary Fig. 3a.** HR-ESIMS spectrum of **4**.

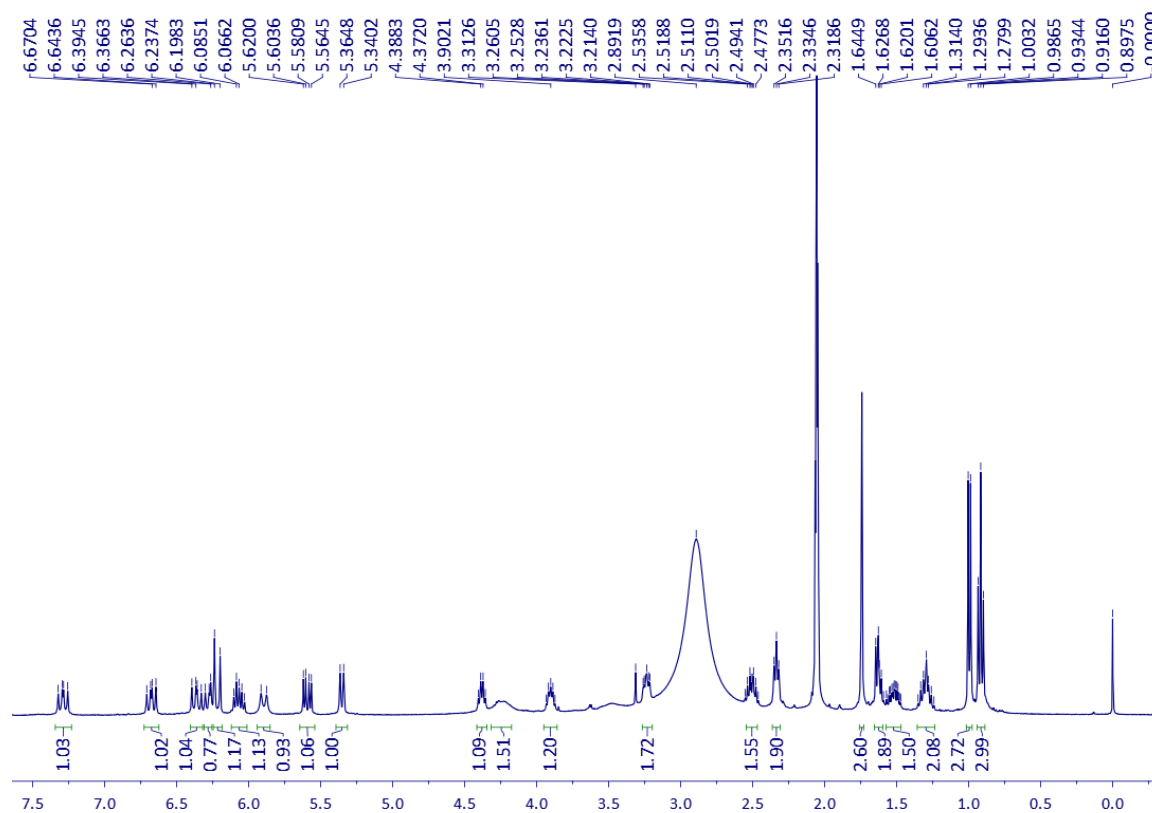

**Supplementary Fig. 3b.** <sup>1</sup>H NMR spectrum of **4** in acetone-*d*<sub>6</sub> (400 MHz).



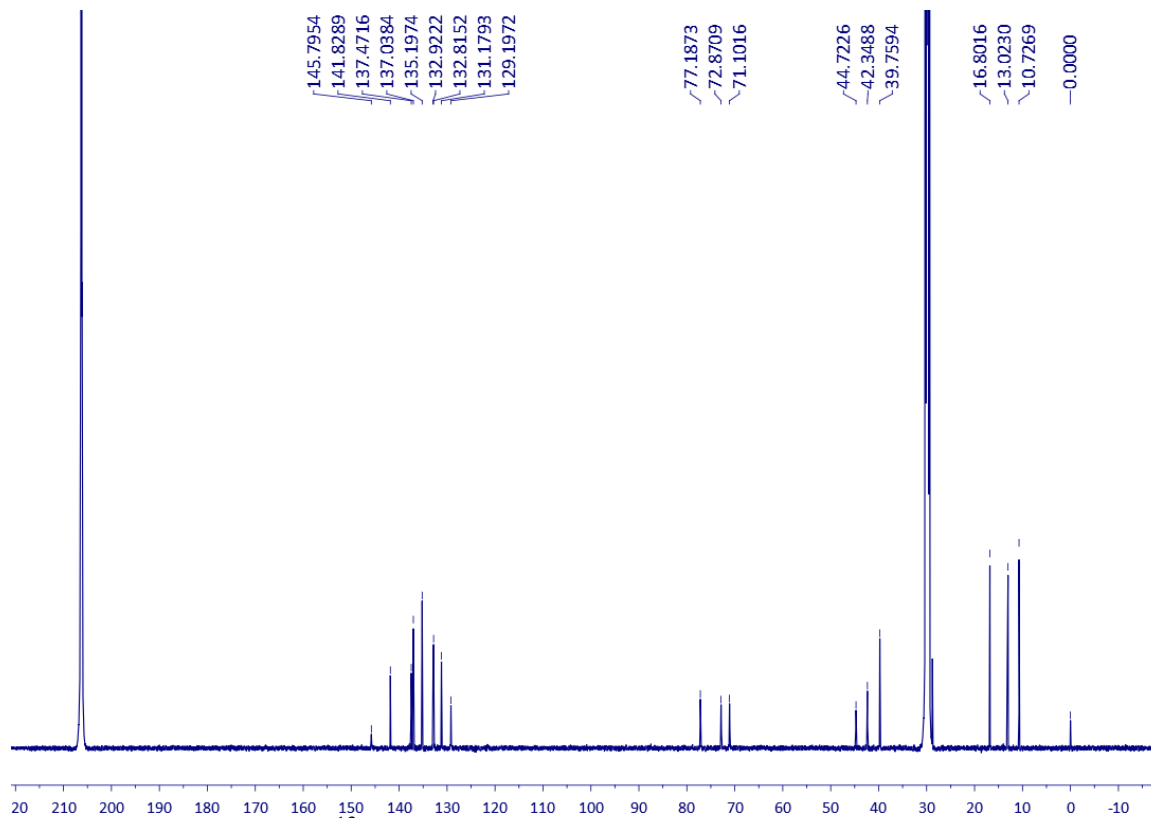

Supplementary Fig. 3c.  $^{13}\text{C}$  NMR spectrum of **4** in acetone- $d_6$  (150 MHz).

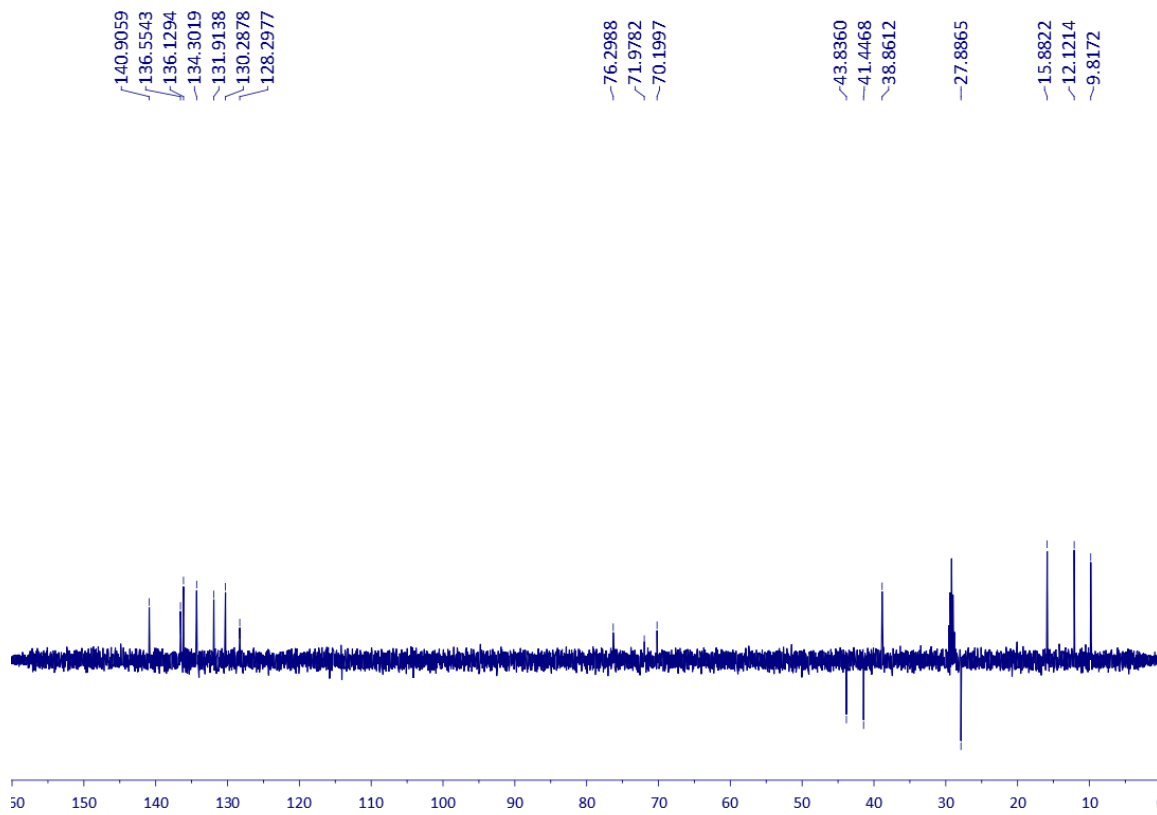

Supplementary Fig. 3d. DEPT-135 NMR spectrum of **4** in acetone- $d_6$  (100 MHz).

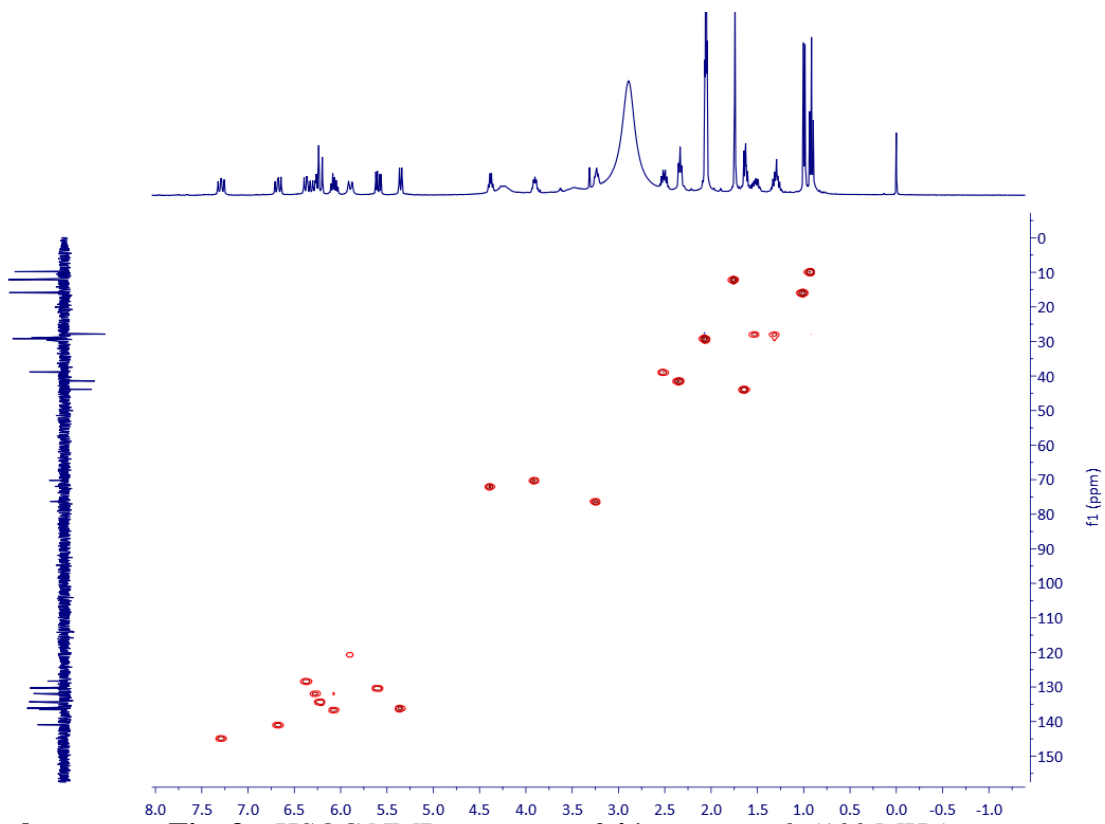

Supplementary Fig. 3e. HSQC NMR spectrum of **4** in acetone- $d_6$  (100 MHz).

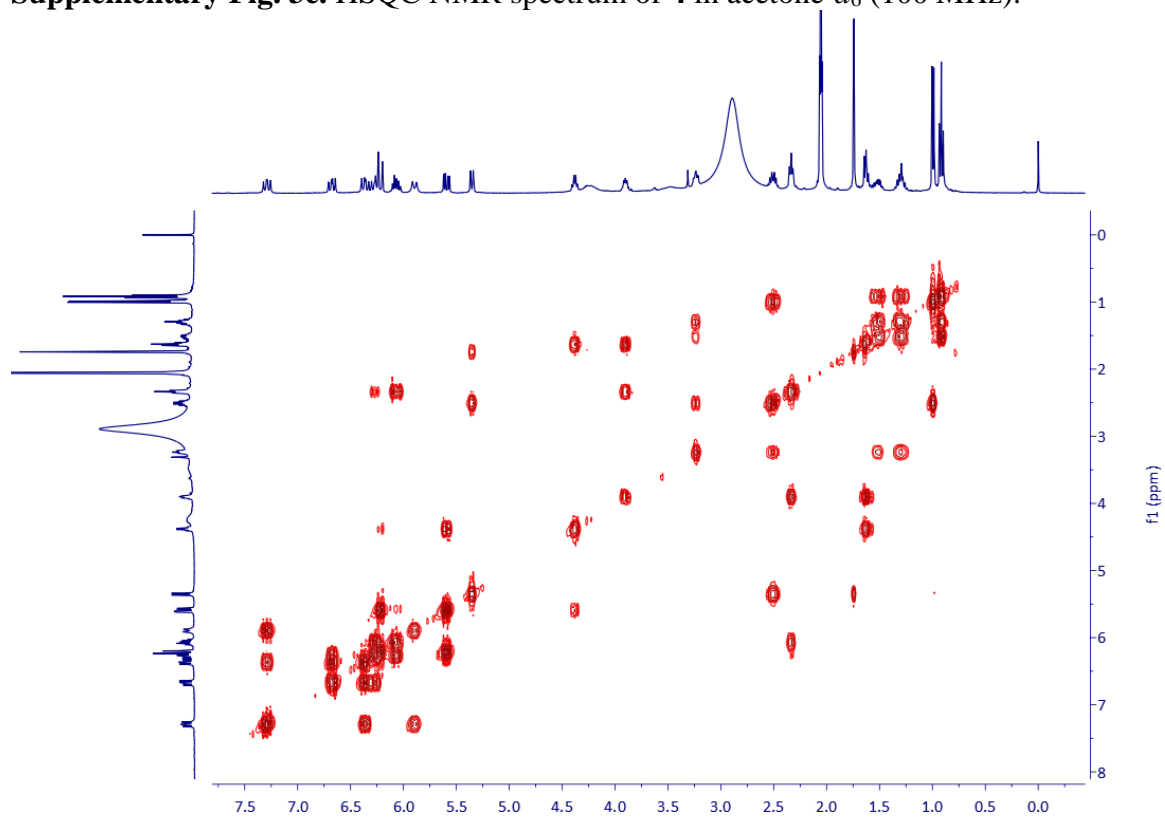

Supplementary Fig. 3f.  $^1\text{H}$ - $^1\text{H}$  COSY NMR spectrum of **4** in acetone- $d_6$  (400 MHz).

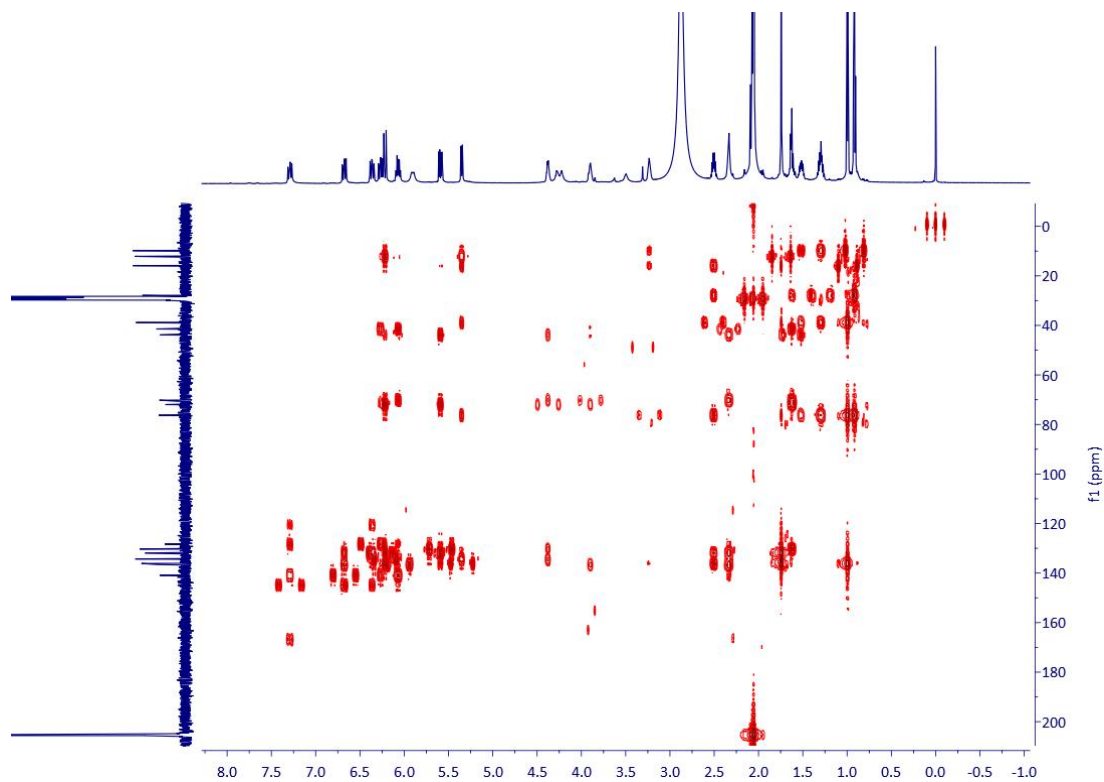

**Supplementary Fig. 3g.** HMBC NMR spectrum of **4** in acetone- $d_6$  (600 MHz).

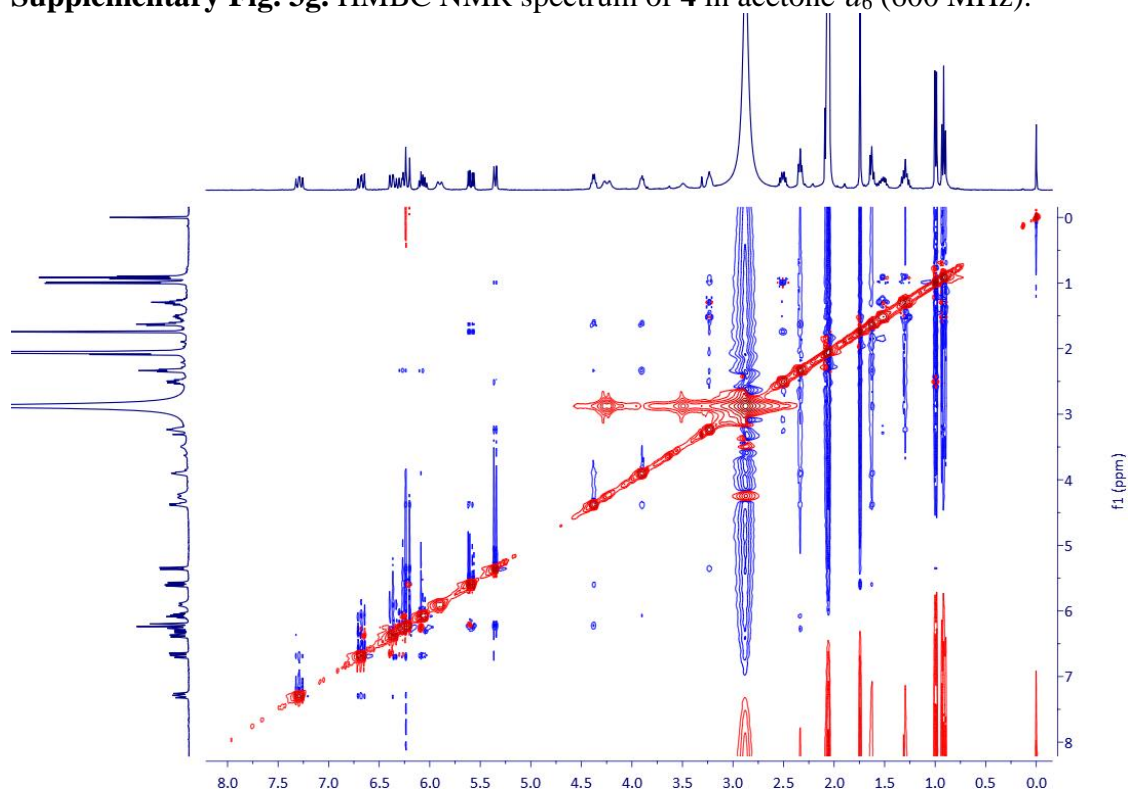

**Supplementary Fig. 3h.** NOESY spectrum of **4** in acetone- $d_6$  (600 MHz).

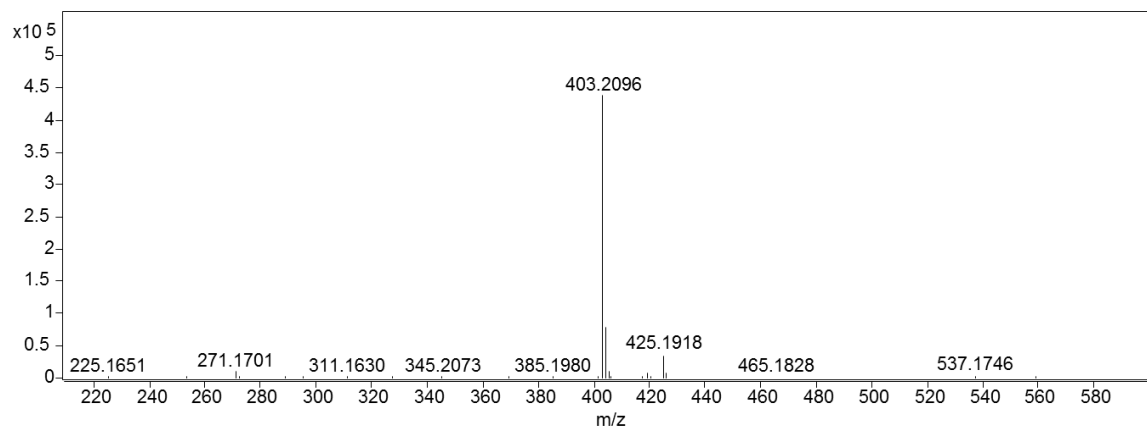

**Supplementary Fig. 4a.** HR-ESIMS of spectrum of **5**.

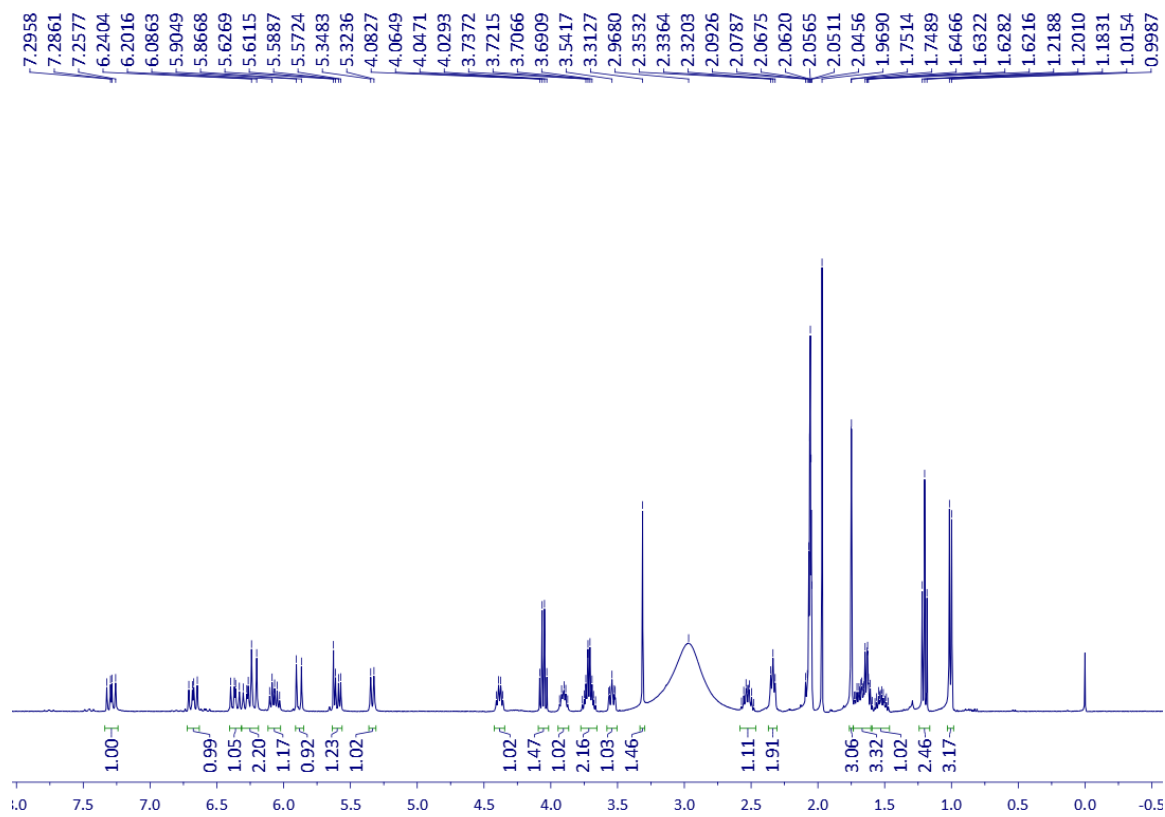

**Supplementary Fig. 4b.** <sup>1</sup>H NMR spectrum of **5** in acetone-*d*<sub>6</sub> (400 MHz).

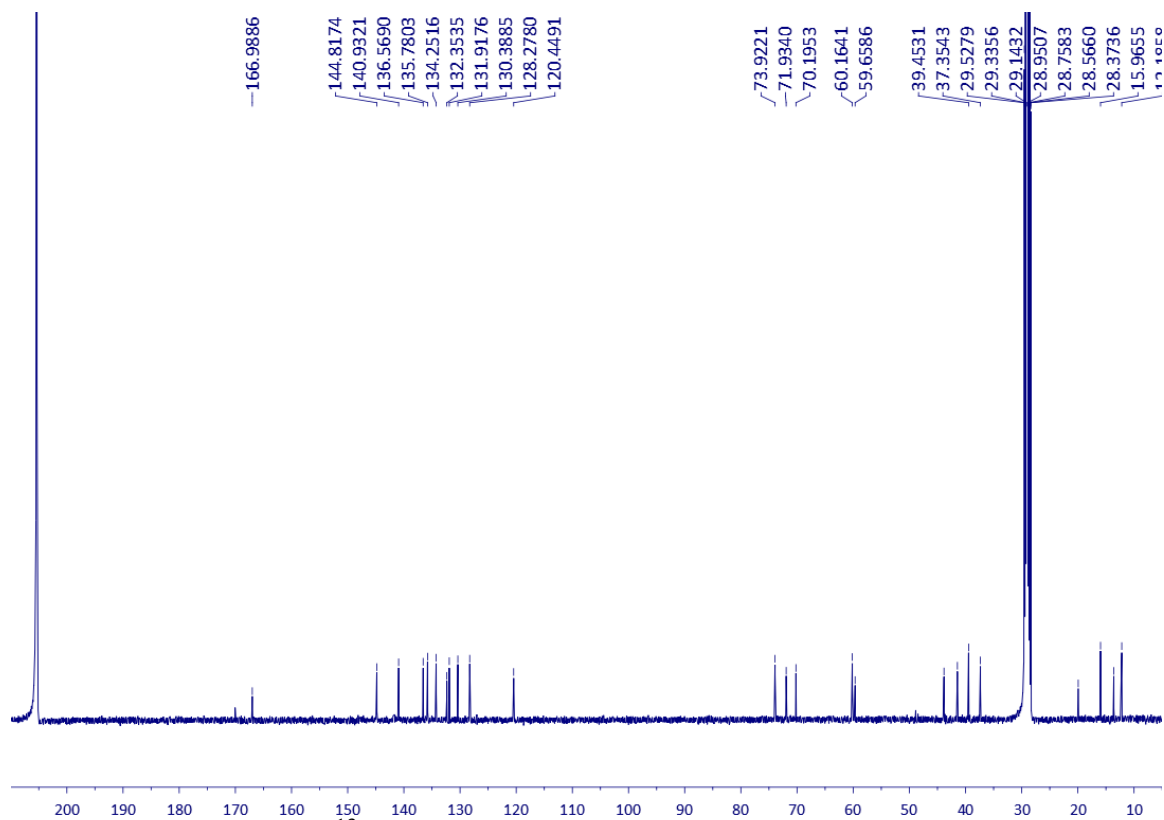

Supplementary Fig. 4c.  $^{13}\text{C}$  NMR spectrum of **5** in acetone- $d_6$  (100 MHz).

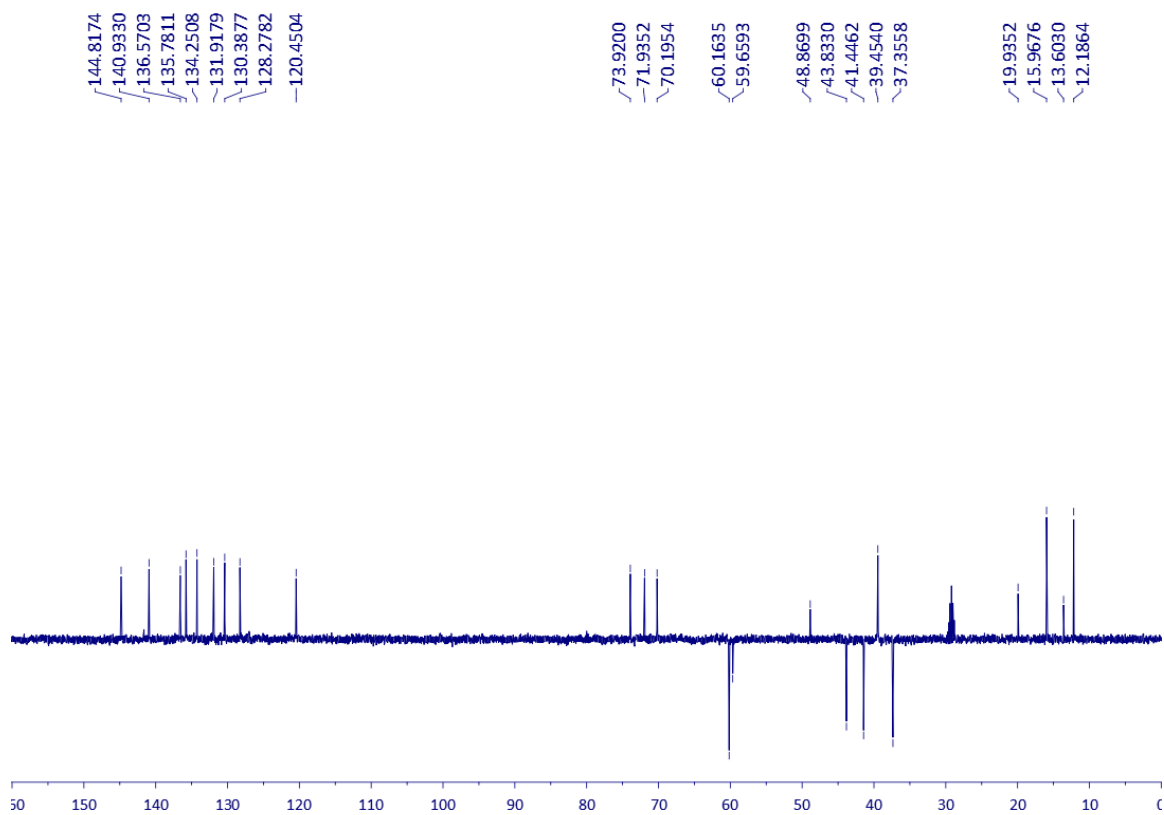

Supplementary Fig. 4d. DEPT-135 NMR spectrum of **5** in acetone- $d_6$  (100 MHz).

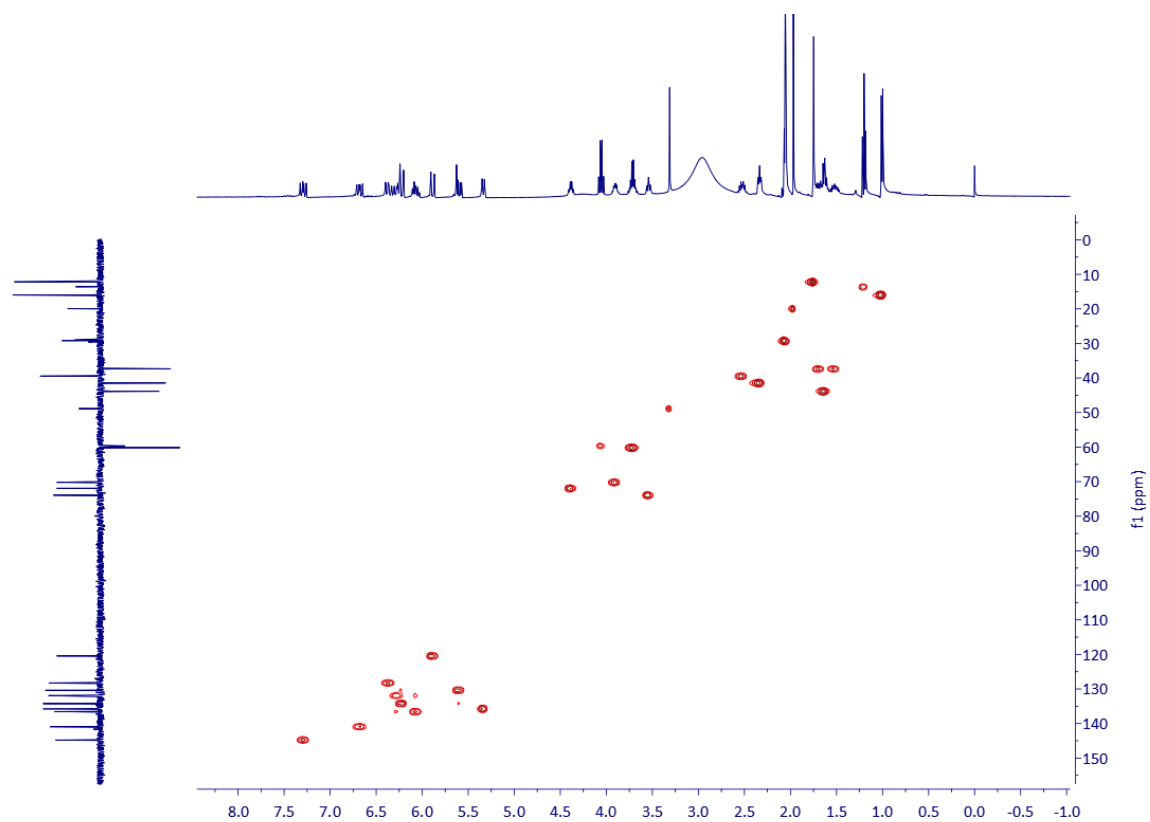

Supplementary Fig. 4e. HSQC NMR spectrum of **5** in acetone- $d_6$  (400 MHz).

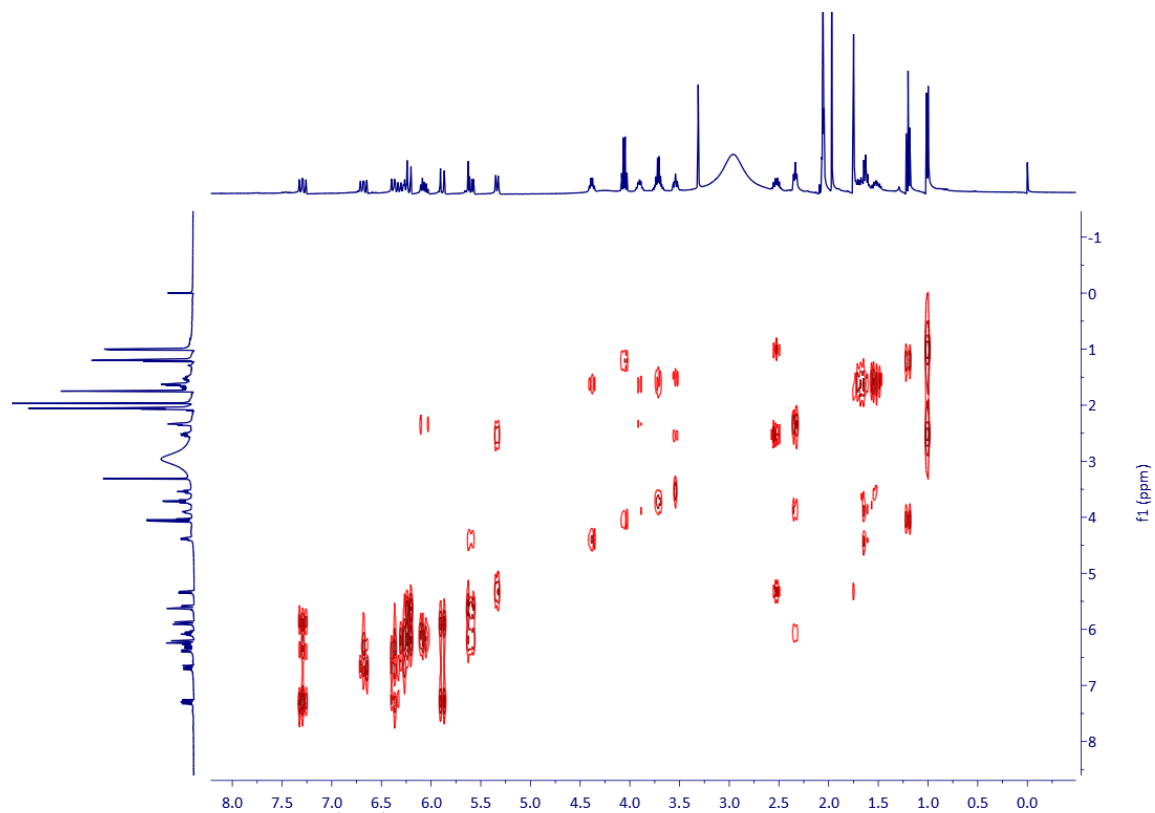

Supplementary Fig. 4f.  $^1\text{H}$ - $^1\text{H}$  COSY NMR spectrum of **5** in acetone- $d_6$  (400 MHz).

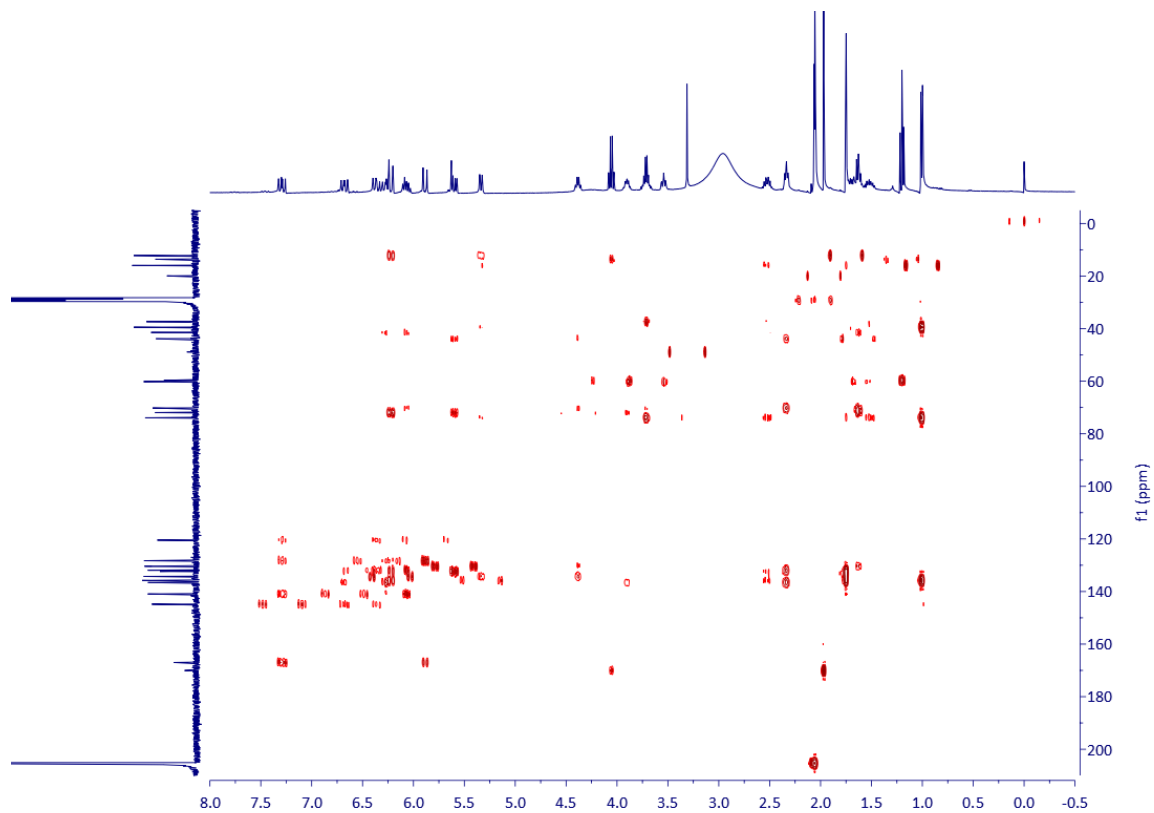

Supplementary Fig. 4g. HMBC NMR spectrum of **5** in acetone- $d_6$  (400 MHz).

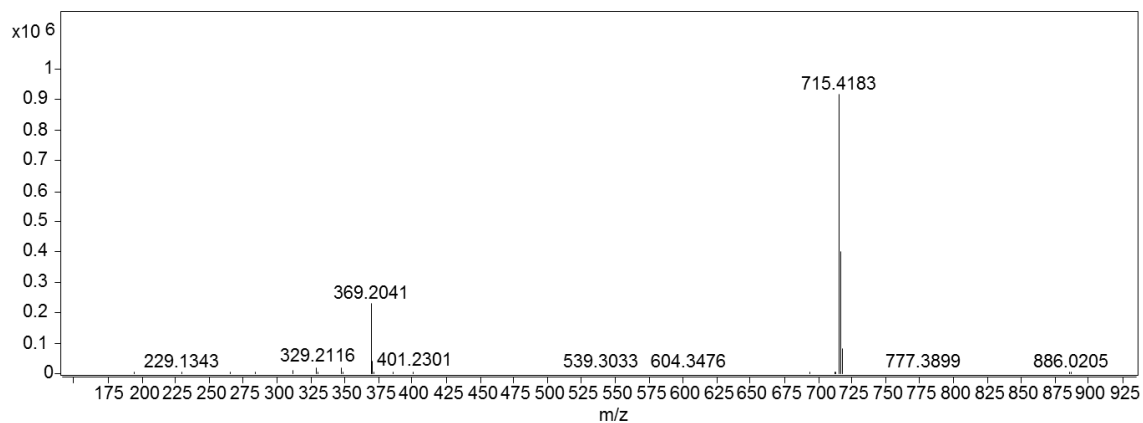

**Supplementary Fig. 5a.** HR-ESIMS spectrum of **6**.

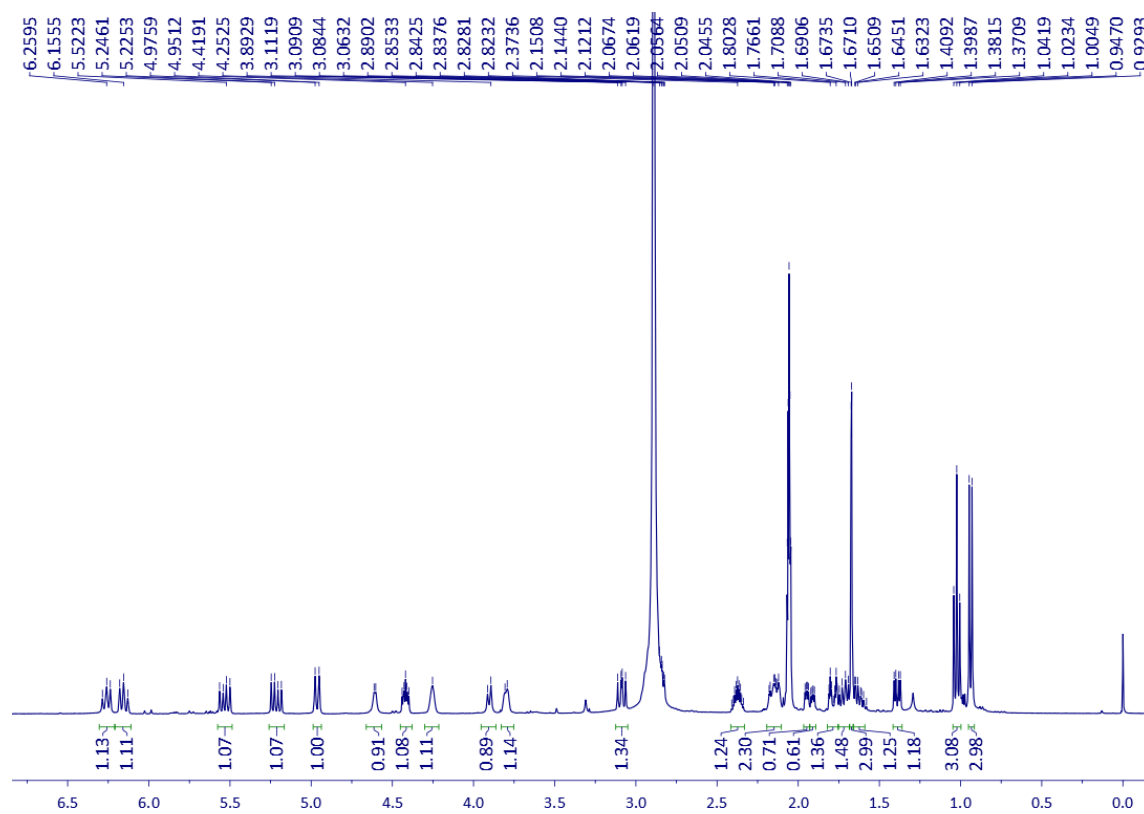

**Supplementary Fig. 5b.** <sup>1</sup>H NMR spectrum of **6** in acetone-*d*<sub>6</sub> (400 MHz).



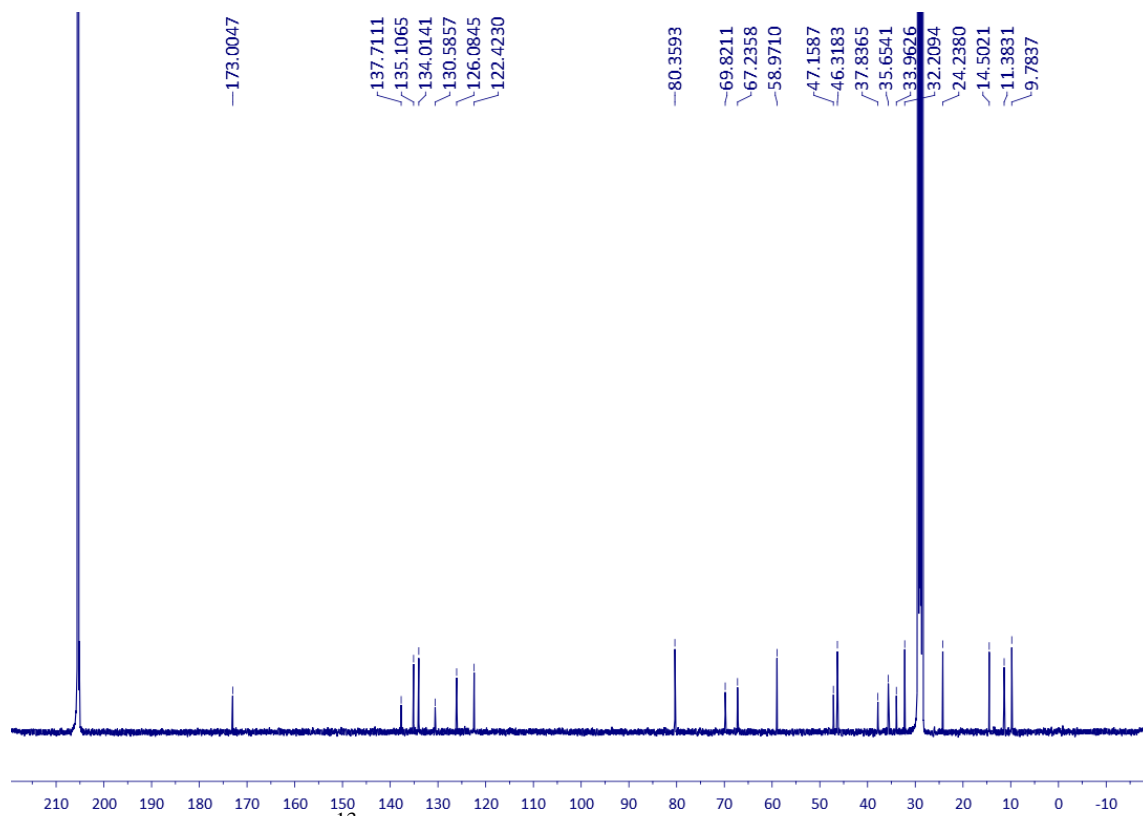

**Supplementary Fig. 5c.**  $^{13}\text{C}$  NMR spectrum of **6** in acetone- $d_6$  (100 MHz).

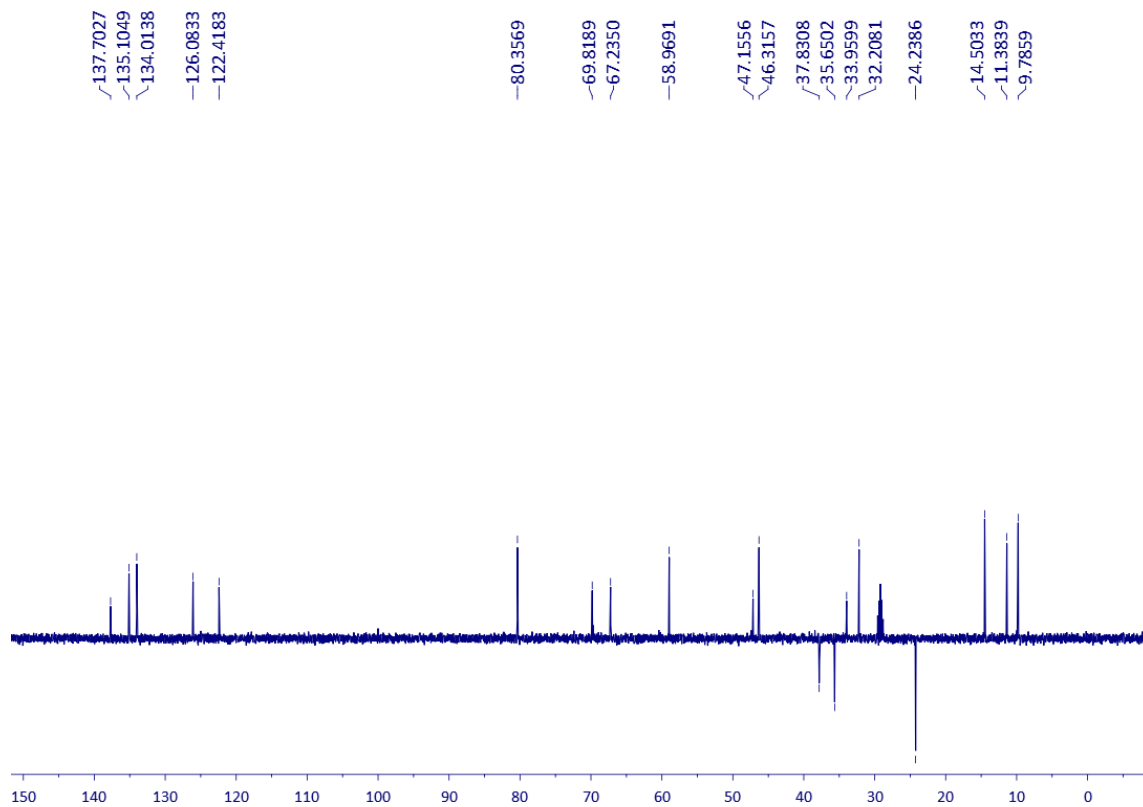

**Supplementary Fig. 5d.** DEPT-135 NMR spectrum of **6** in acetone- $d_6$  (100 MHz).

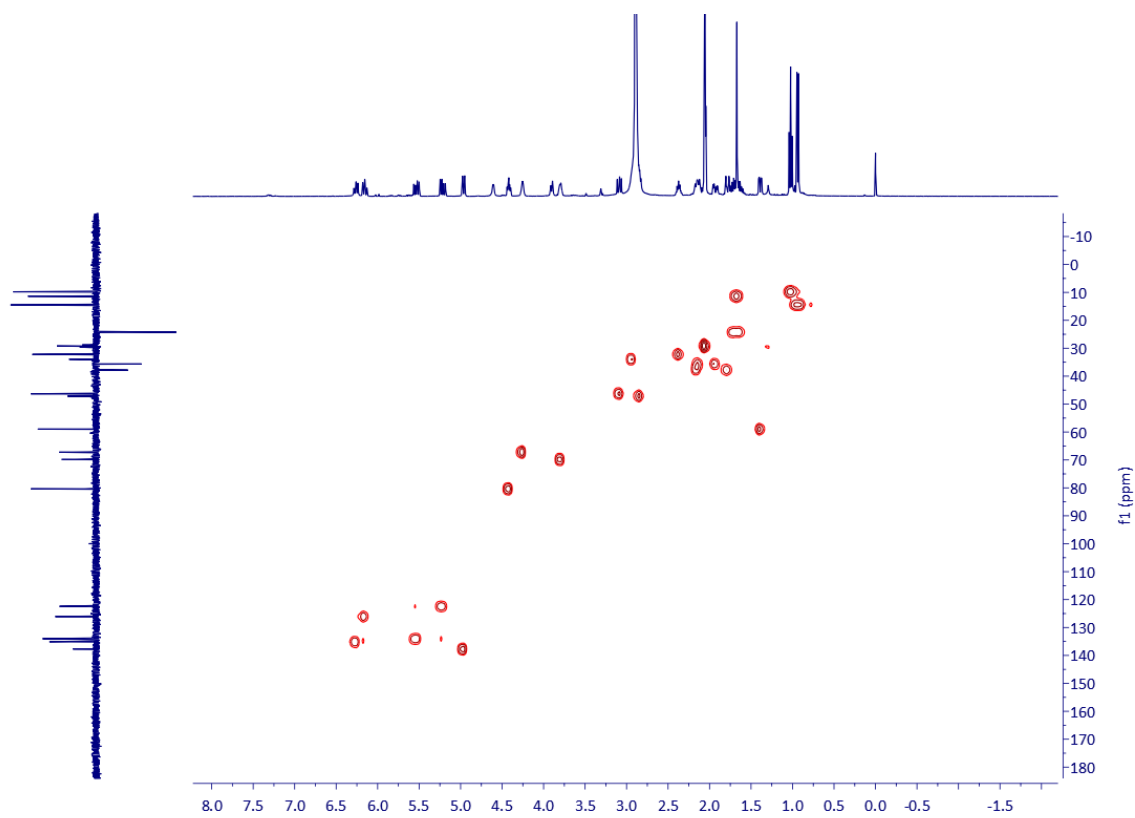

**Supplementary Fig. 5e.** HSQC NMR spectrum of **6** in acetone-*d*<sub>6</sub> (400 MHz).

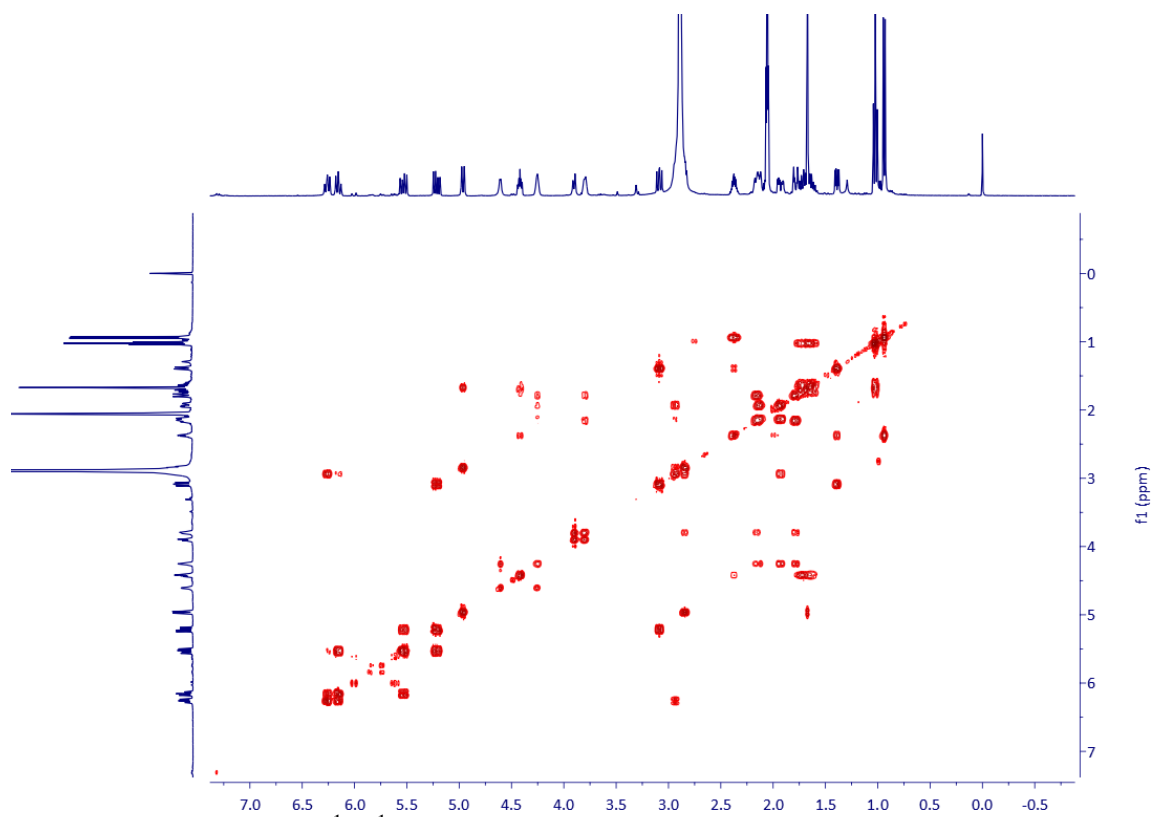

**Supplementary Fig. 5f.** <sup>1</sup>H-<sup>1</sup>H COSY NMR spectrum of **6** in acetone-*d*<sub>6</sub> (400 MHz).

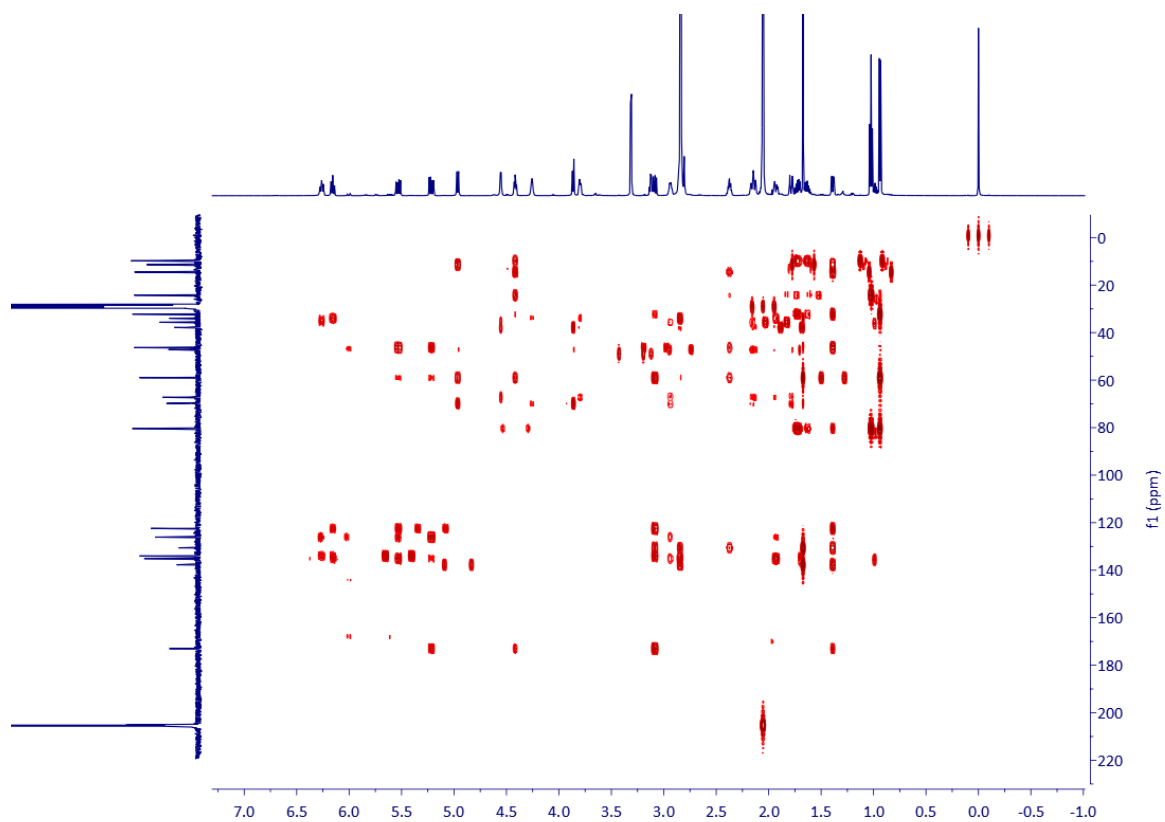

**Supplementary Fig. 5g.** HMBC NMR spectrum of **6** in acetone- $d_6$  (600 MHz).

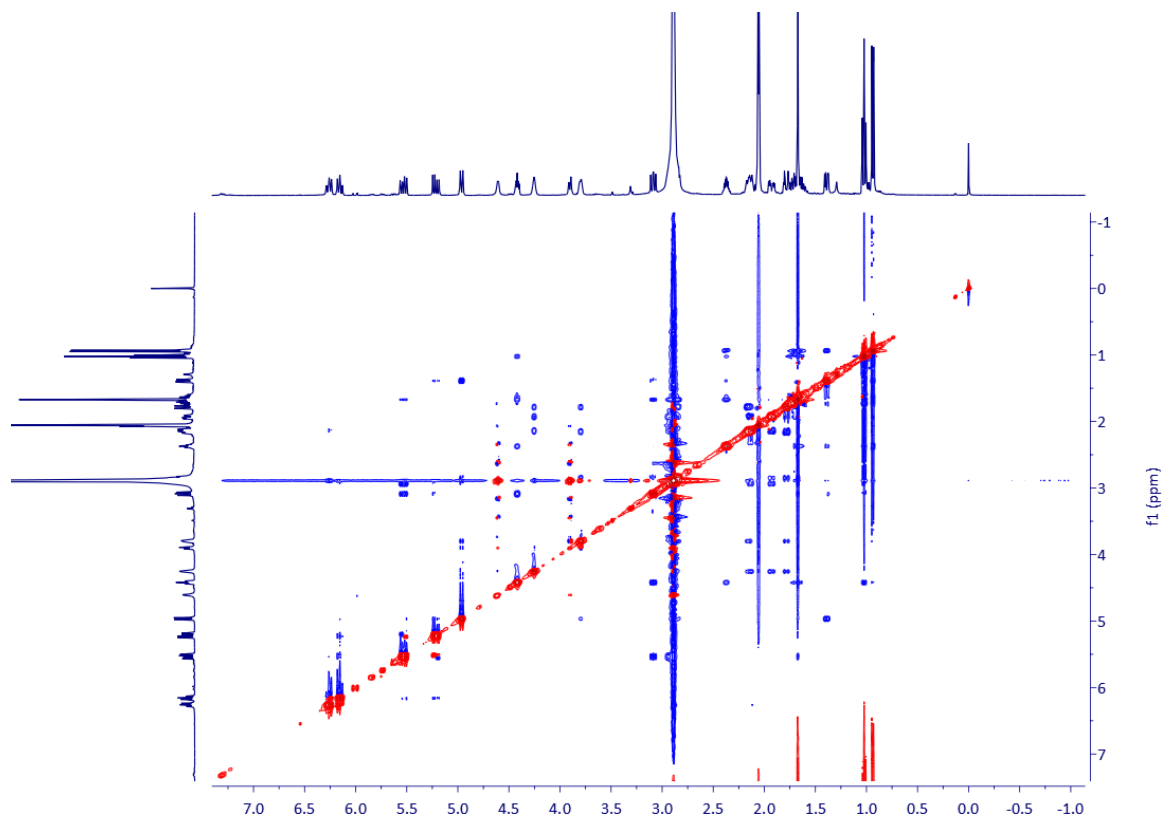

**Supplementary Fig. 5h.** NOESY spectrum of **6** in acetone- $d_6$  (600 MHz).

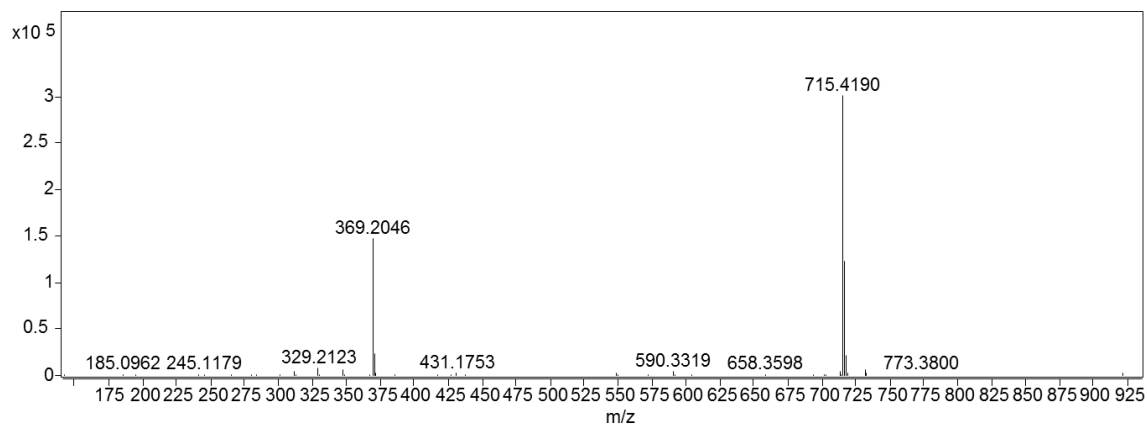

**Supplementary Fig. 6a.** HR-ESIMS spectrum of **7**.

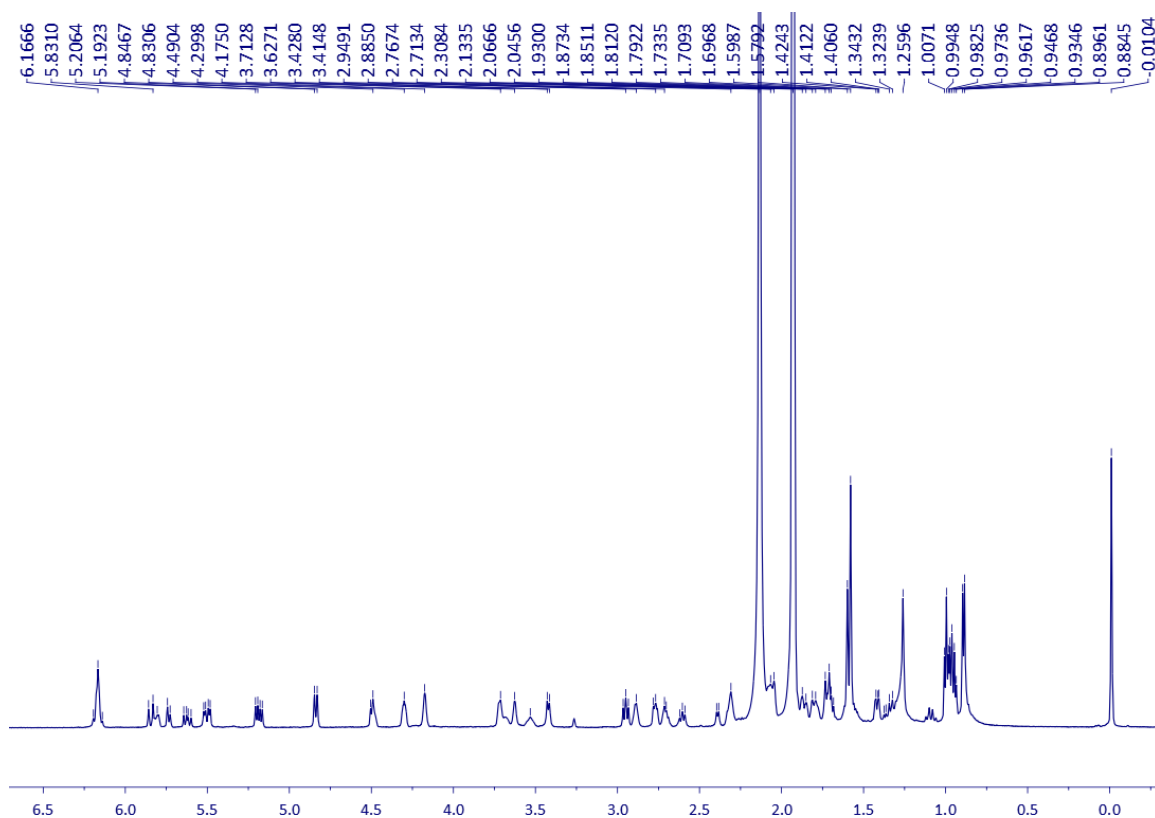

**Supplementary Fig. 6b.** <sup>1</sup>H NMR spectrum of mixture of **6** and **7** in acetonitrile-*d*<sub>3</sub> (600 MHz).

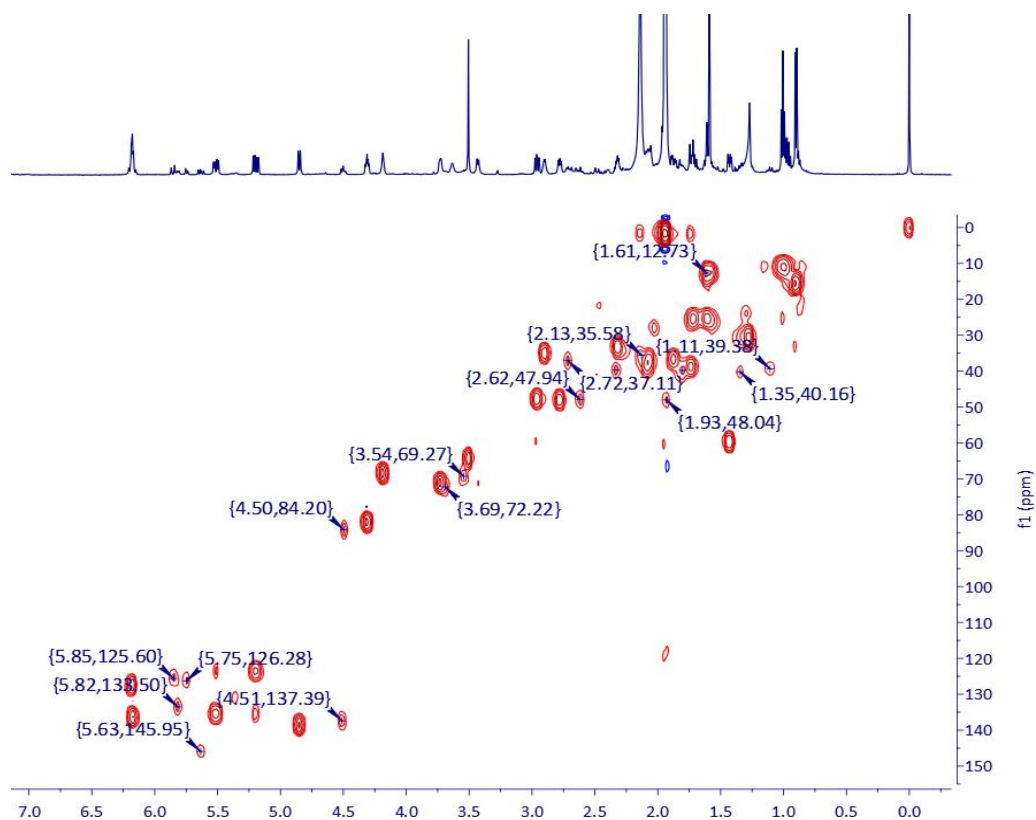

**Supplementary Fig. 6c.** HSQC NMR spectrum of mixture of **6** and **7** in acetonitrile- $d_3$  (600 MHz). The signals for **7** were pointed.

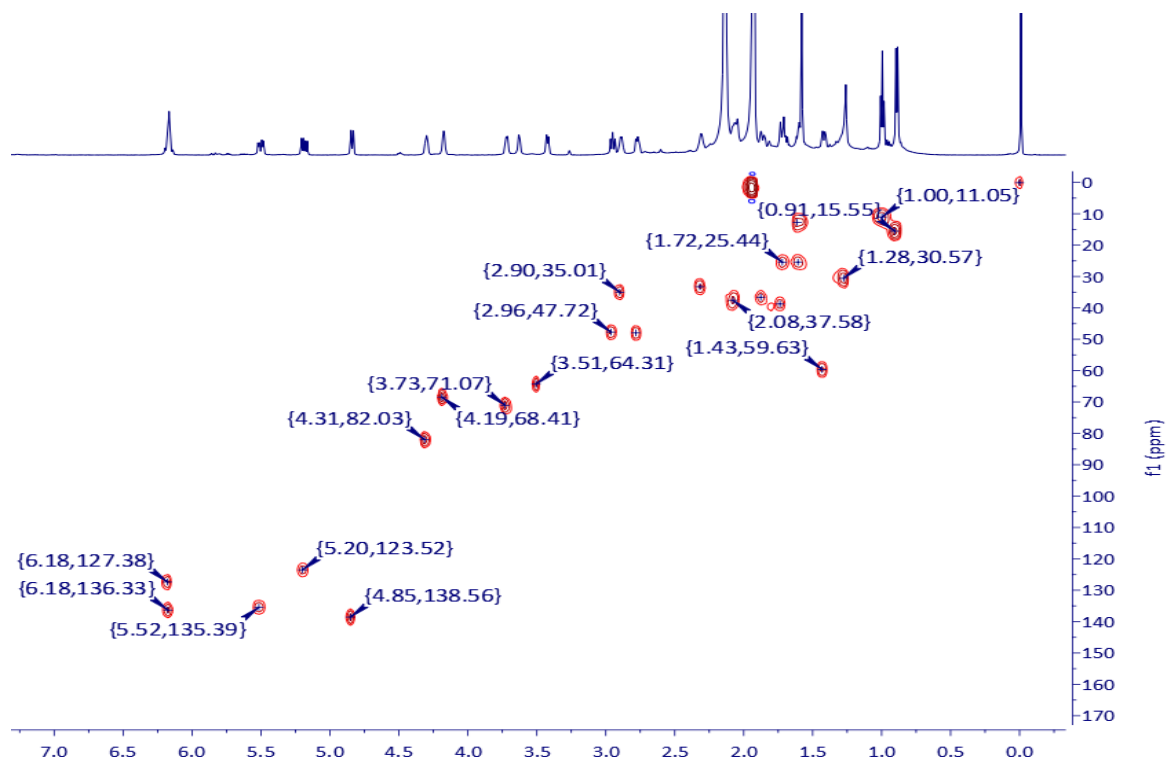

**Supplementary Fig. 6d.** HSQC NMR spectrum of **6** in acetonitrile- $d_3$  (600 MHz).

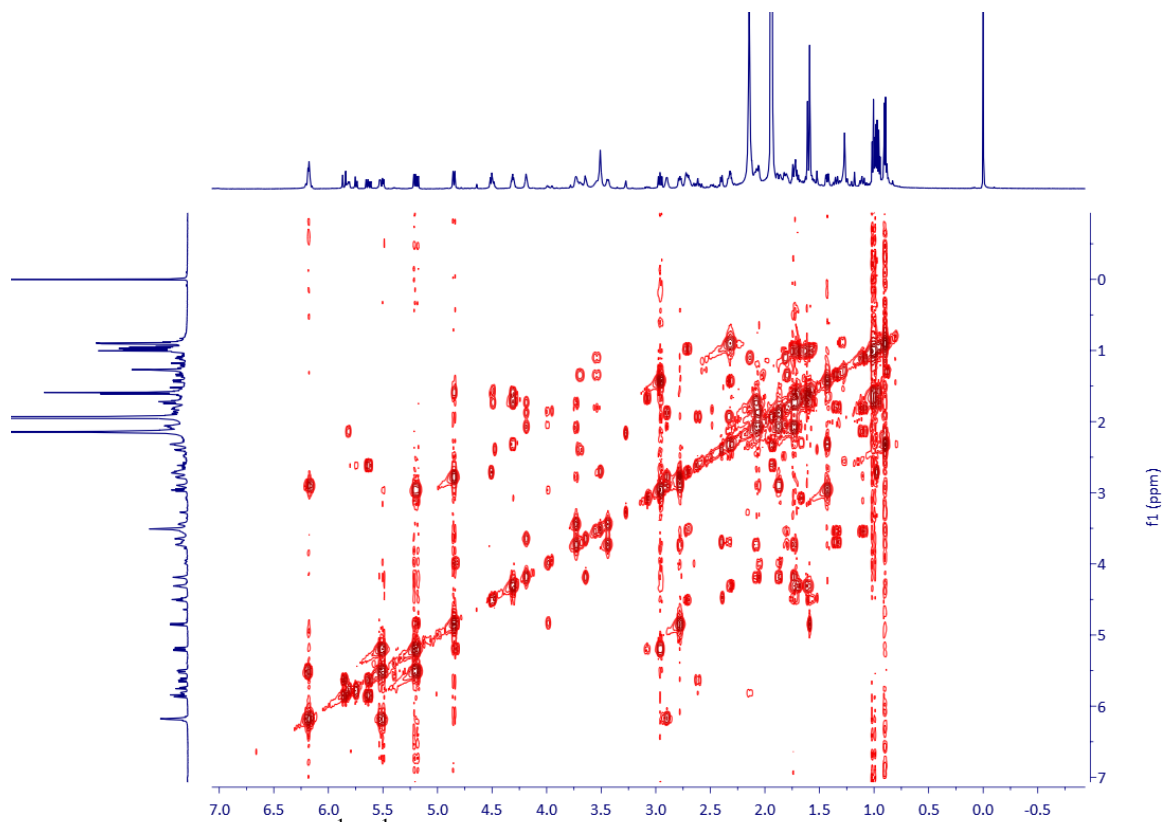

**Supplementary Fig. 6e.** <sup>1</sup>H-<sup>1</sup>H COSY NMR spectrum of mixture of **6** and **7** in acetonitrile-*d*<sub>3</sub> (600 MHz).

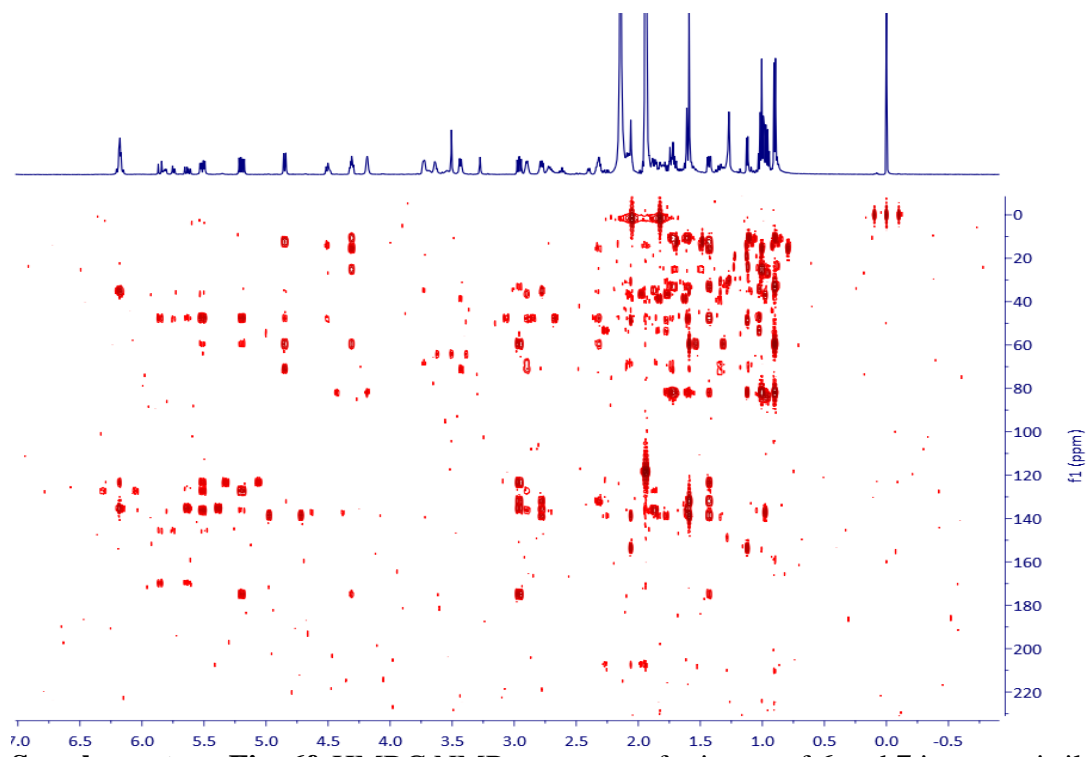

**Supplementary Fig. 6f.** HMBC NMR spectrum of mixture of **6** and **7** in acetonitrile-*d*<sub>3</sub> (600 MHz).

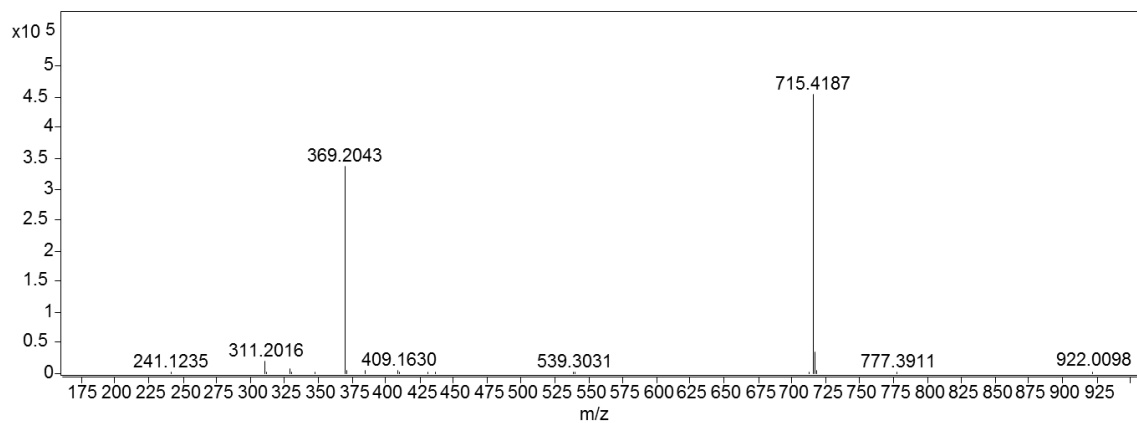

**Supplementary Fig. 7a.** HR-ESIMS spectrum of **8**.

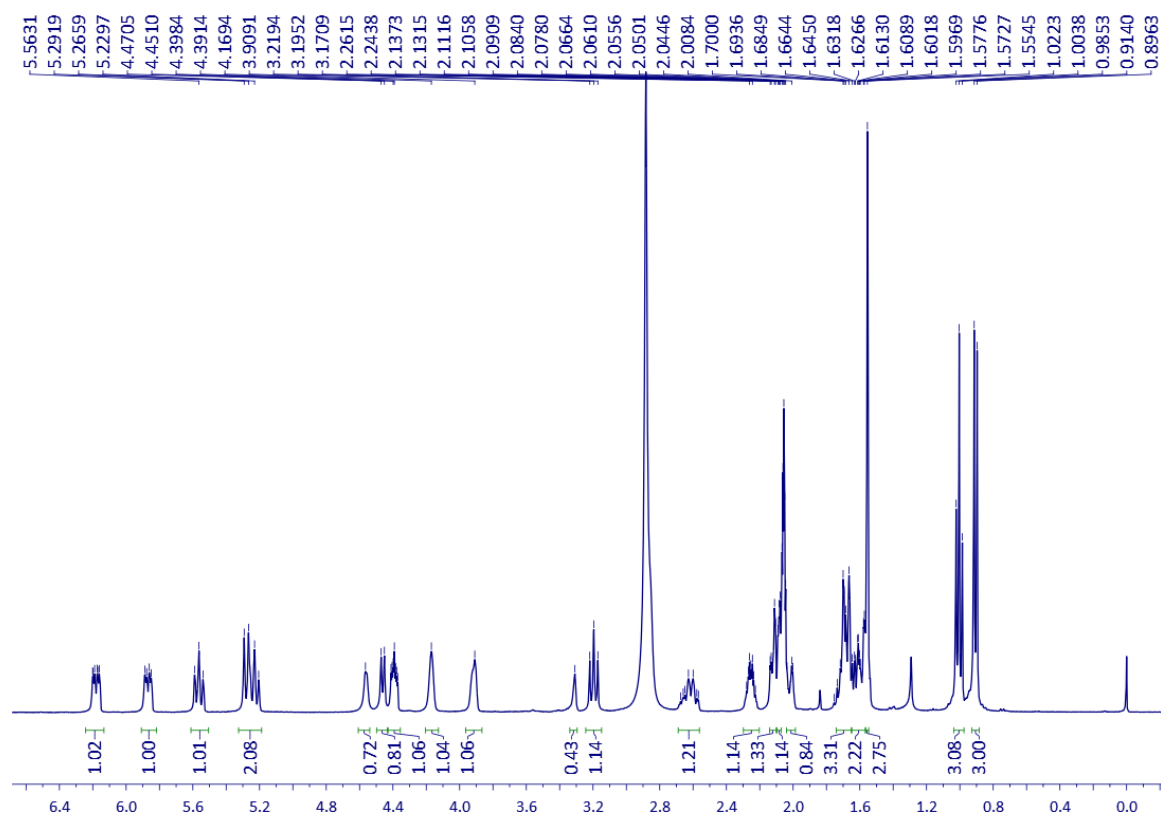

**Supplementary Fig. 7b.** <sup>1</sup>H NMR spectrum of **8** in acetone-*d*<sub>6</sub> (400 MHz).

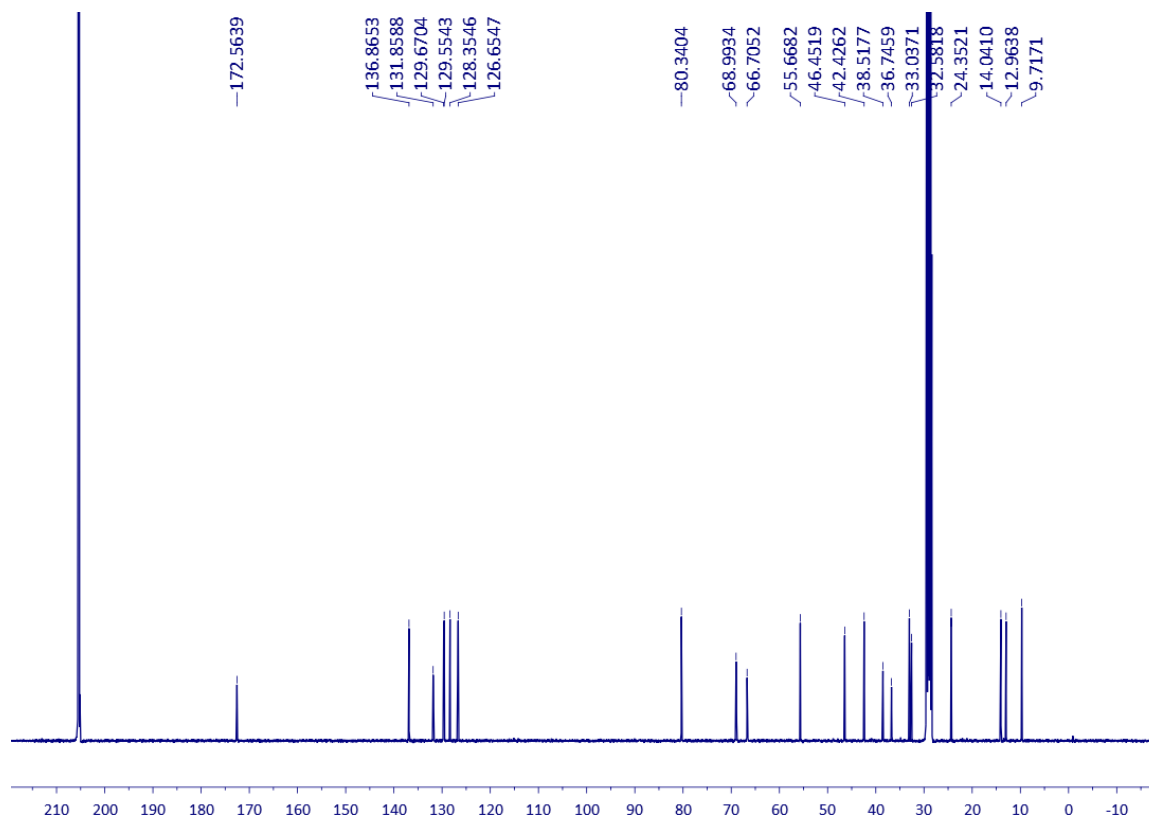

Supplementary Fig. 7c.  $^{13}\text{C}$  NMR spectrum of **8** in acetone- $d_6$  (100 MHz).

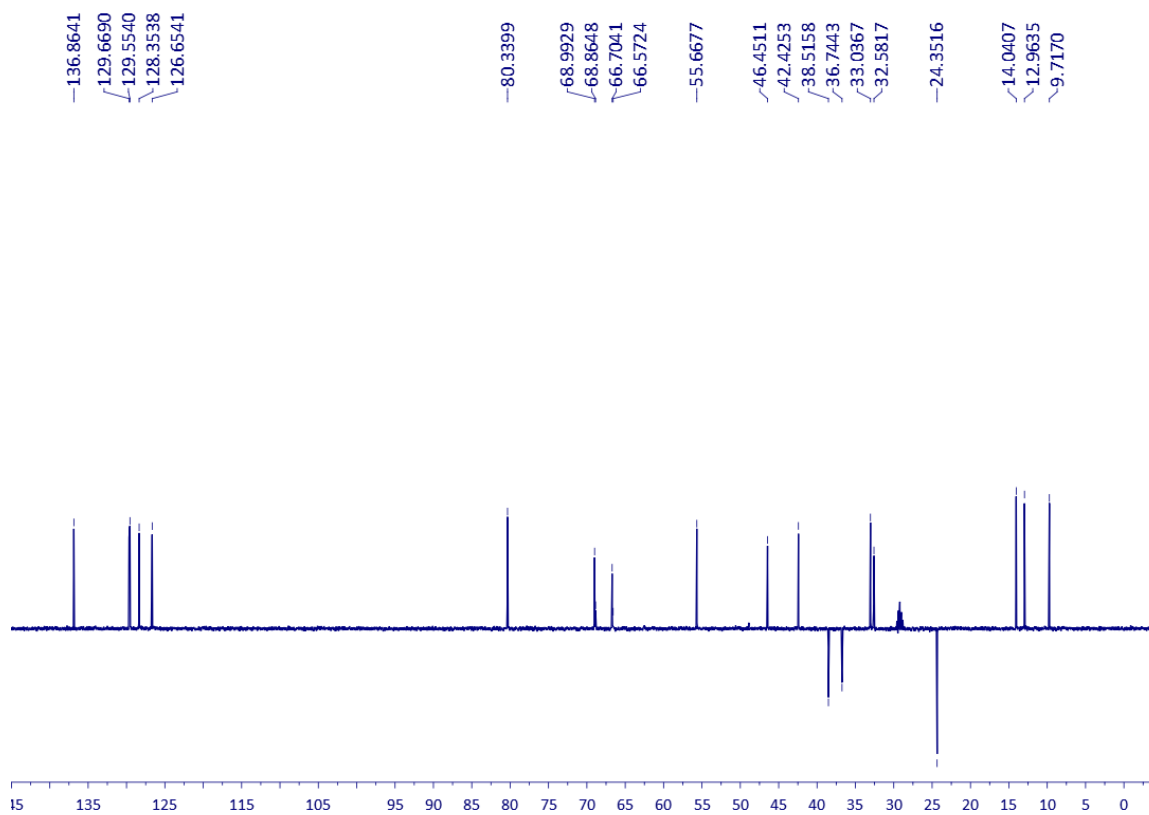

Supplementary Fig. 7d. DEPT-135 NMR spectrum of **8** in acetone- $d_6$  (100 MHz).



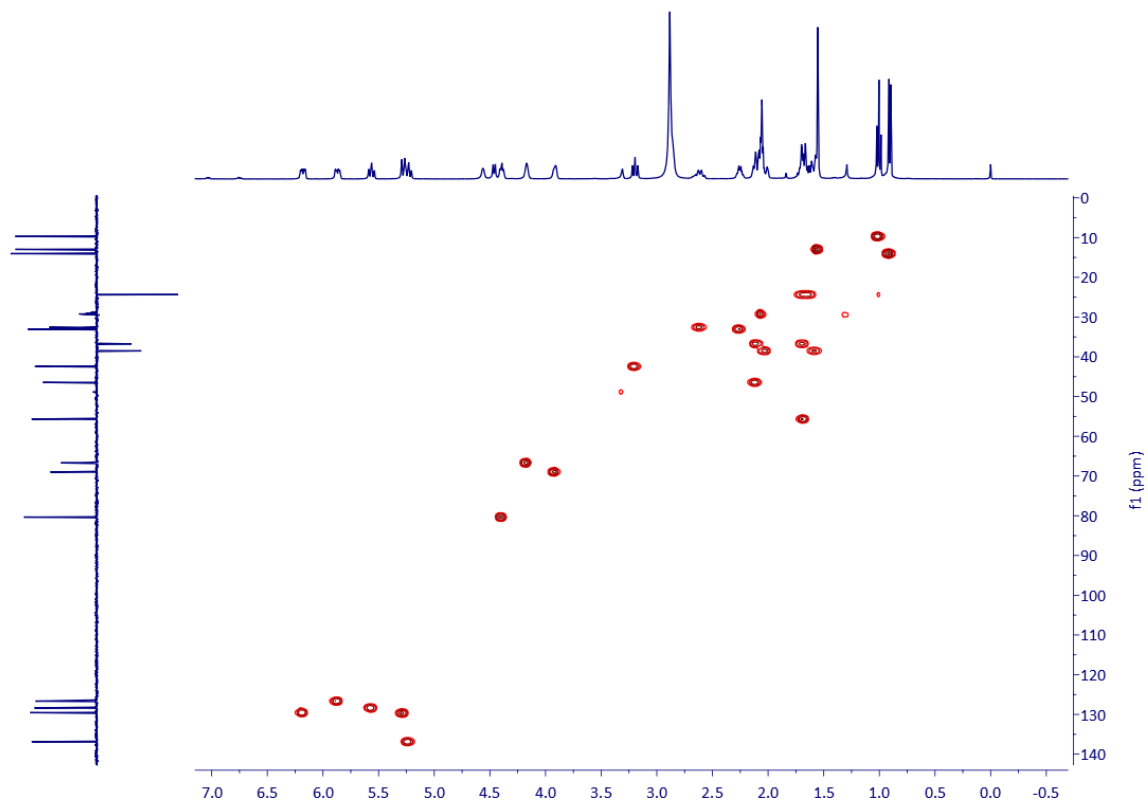

Supplementary Fig. 7e. HSQC NMR spectrum of **8** in acetone- $d_6$  (400 MHz).

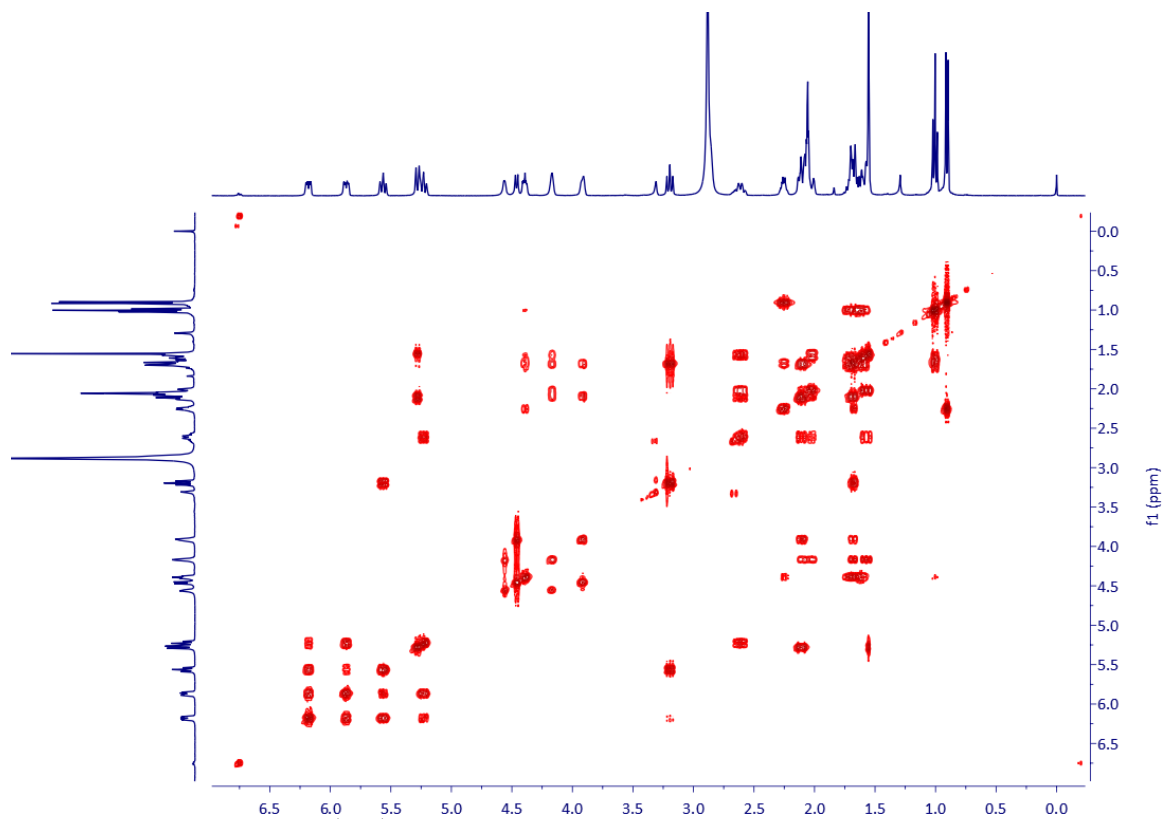

Supplementary Fig. 7f.  $^1\text{H}$ - $^1\text{H}$  COSY NMR spectrum of **8** in acetone- $d_6$  (400 MHz).

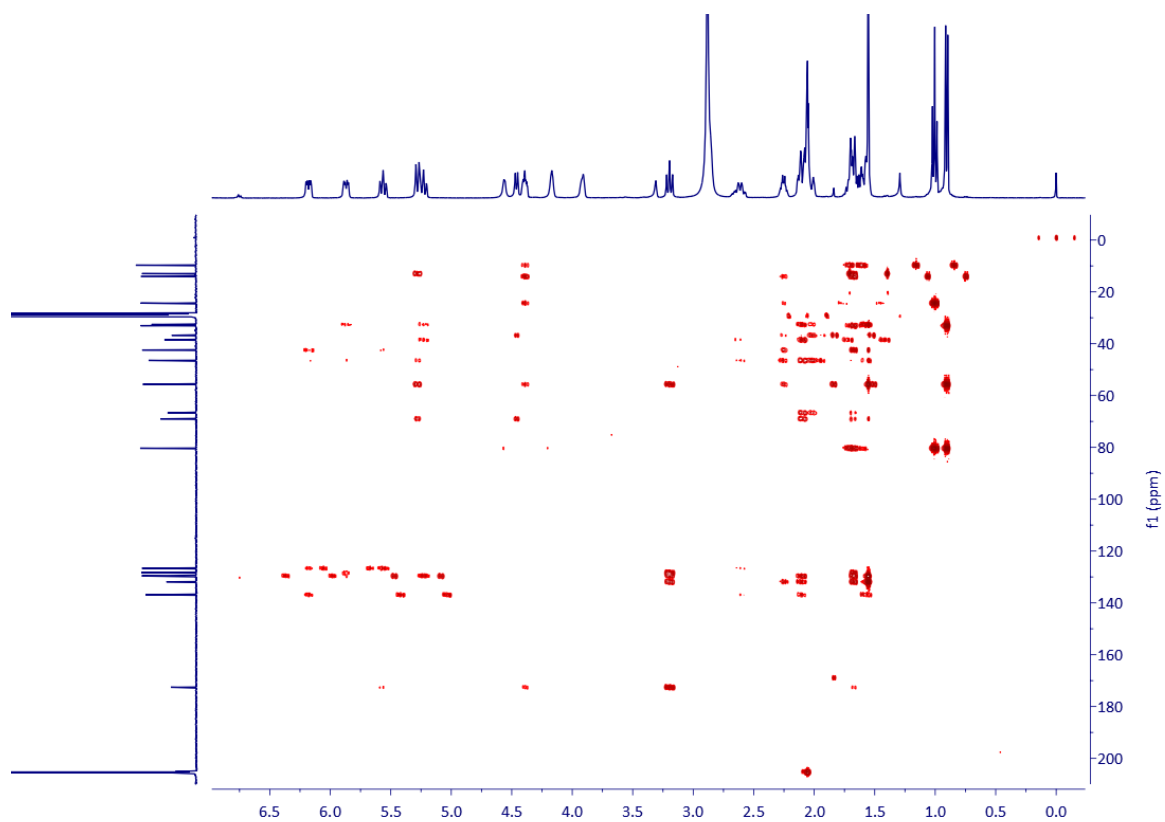

Supplementary Fig. 7g. HMBC NMR spectrum of **8** in acetone- $d_6$  (400 MHz).

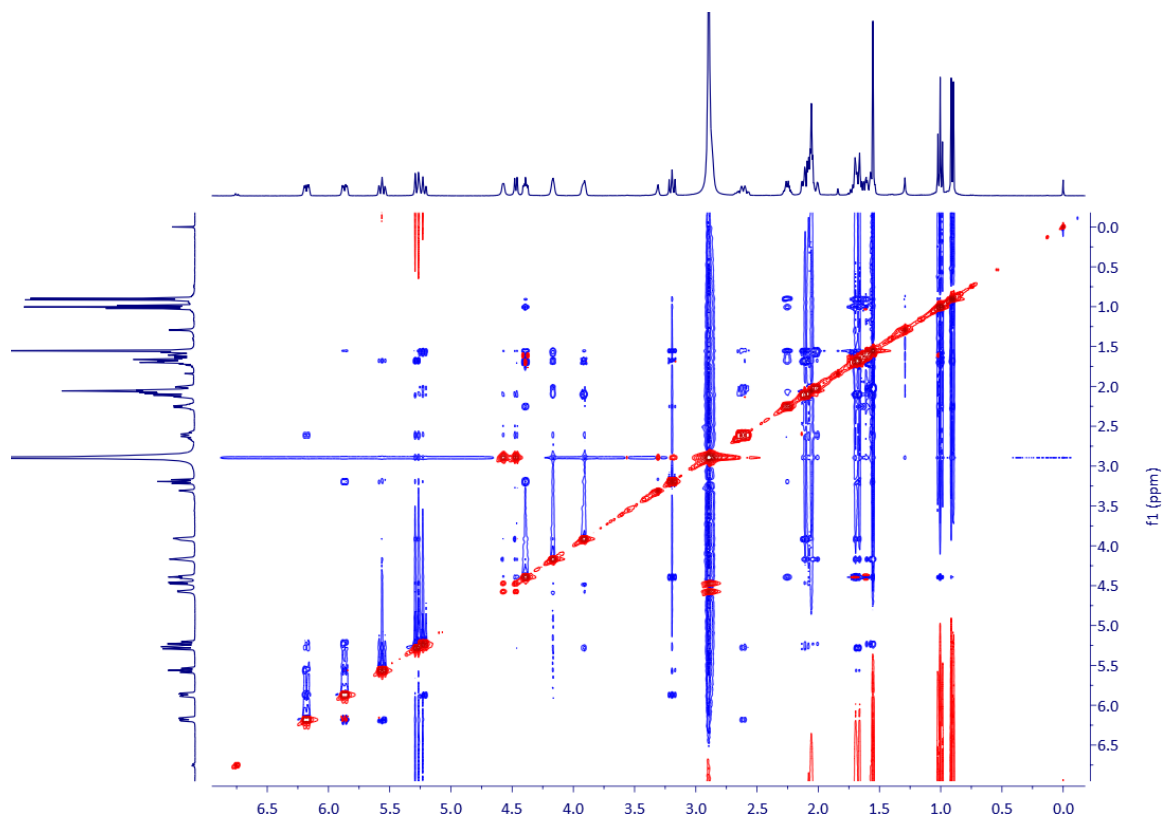

Supplementary Fig. 7h. NOESY spectrum of **8** in acetone- $d_6$  (600 MHz).

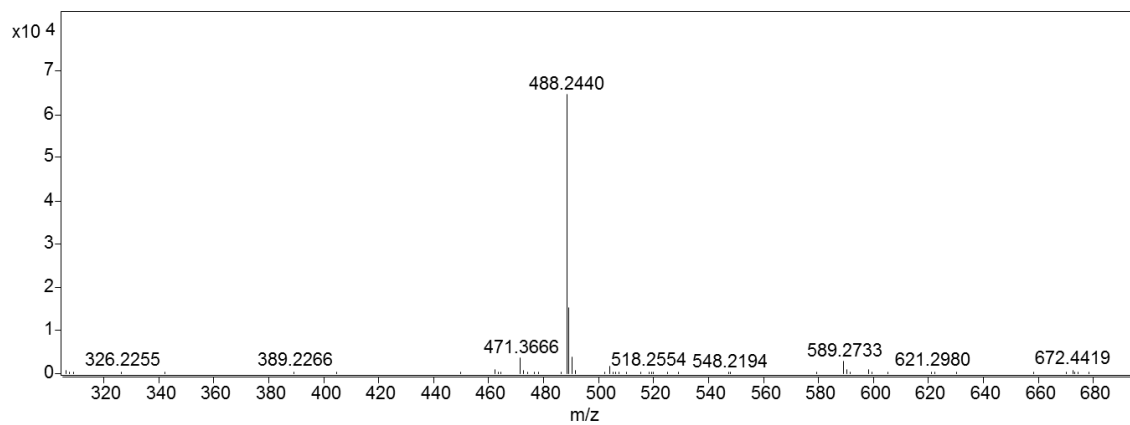

**Supplementary Fig. 8a.** HR-ESIMS spectrum of **10**.

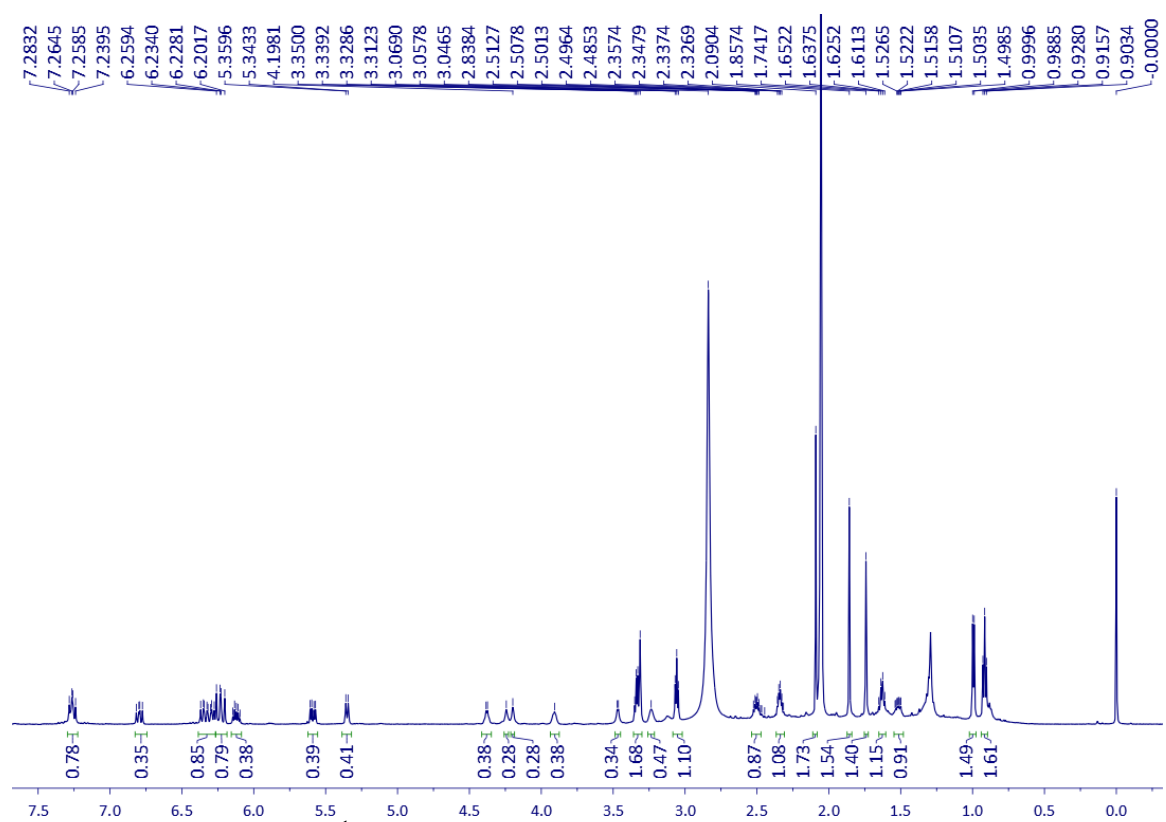

**Supplementary Fig. 8b.** <sup>1</sup>H NMR spectrum of **10** in acetone-*d*<sub>6</sub> (600 MHz).

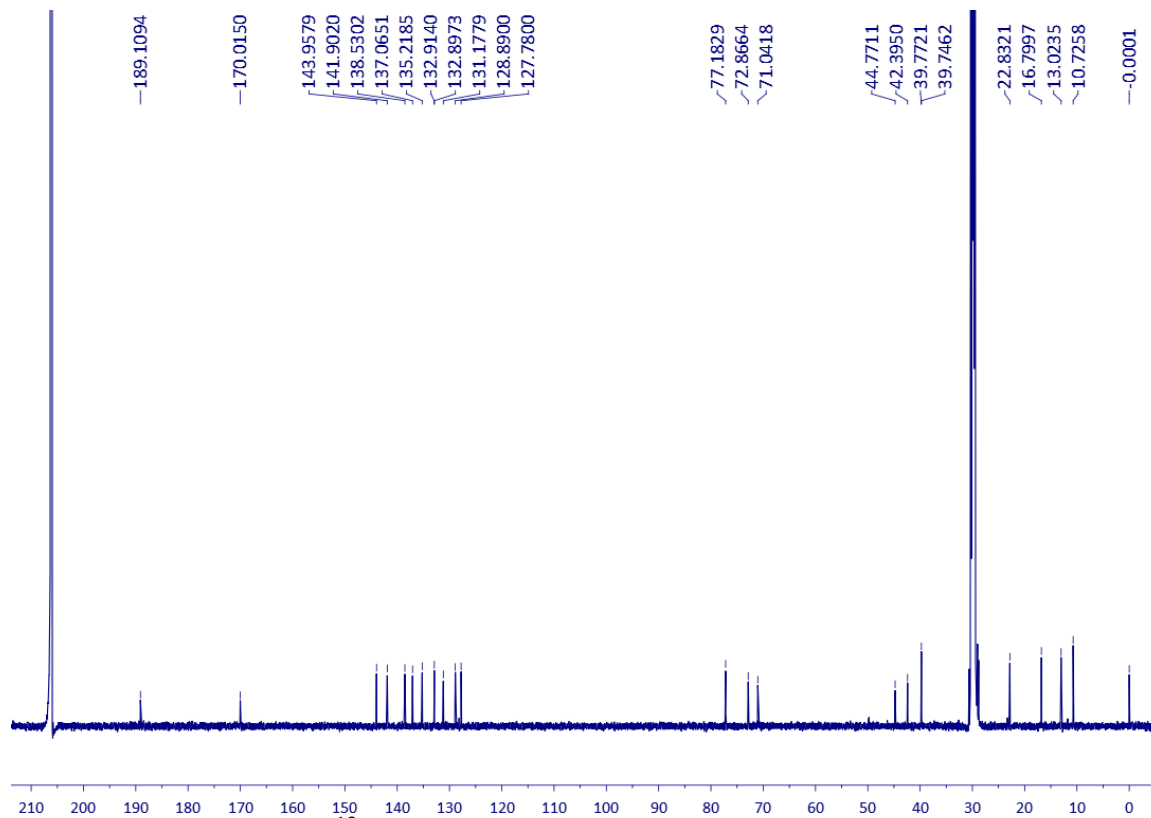

Supplementary Fig. 8c.  $^{13}\text{C}$  NMR spectrum of **10** in acetone- $d_6$  (150 MHz).

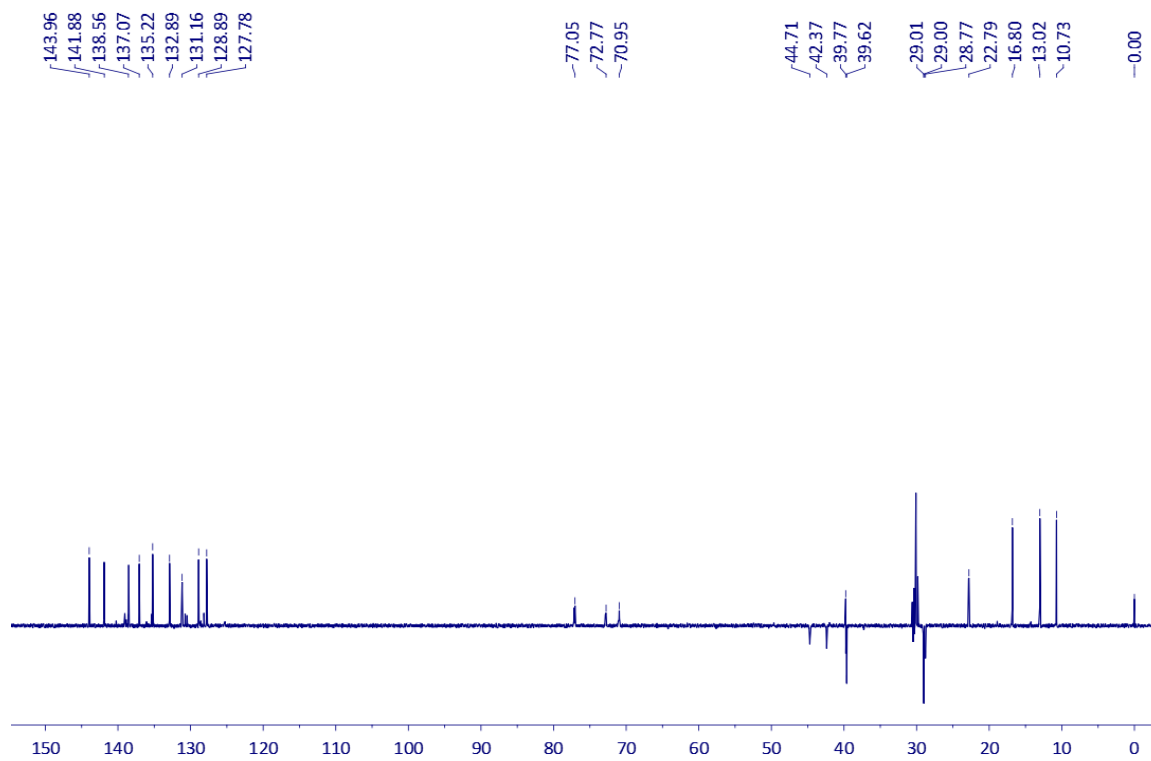

Supplementary Fig. 8d. DEPT-135 NMR spectrum of **10** in acetone- $d_6$  (150 MHz).

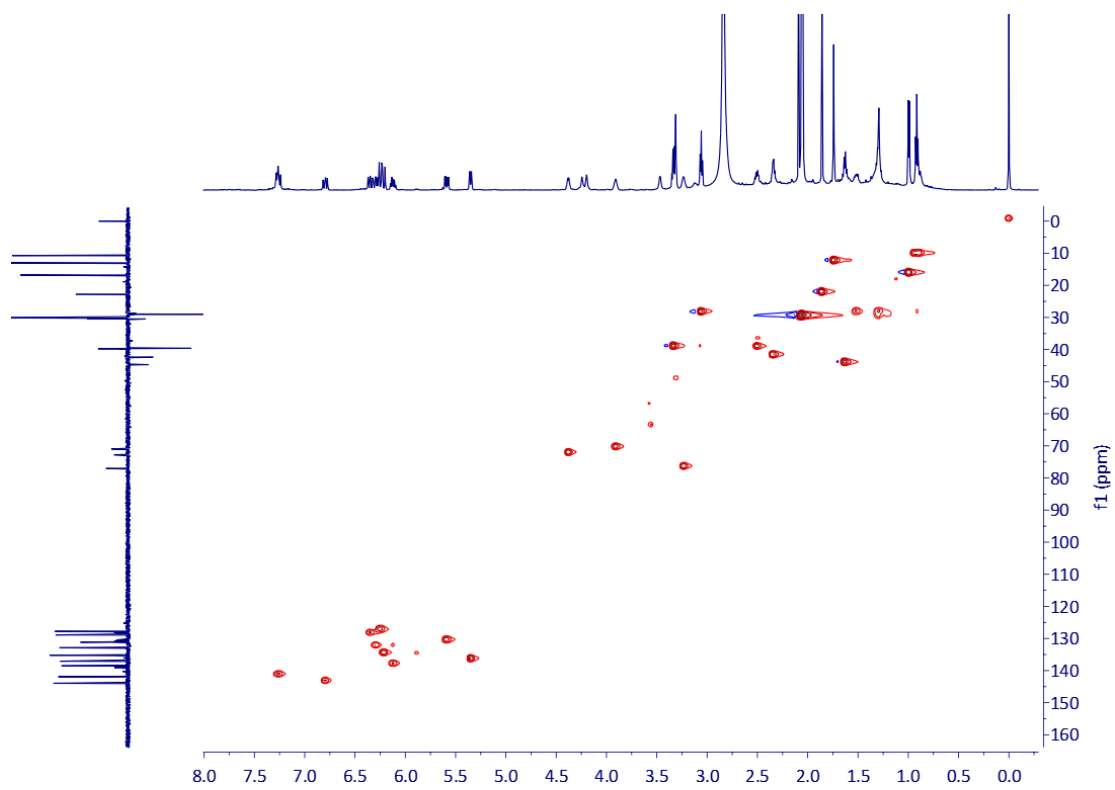

Supplementary Fig. 8e. HSQC NMR spectrum of **10** in acetone-*d*<sub>6</sub> (600 MHz).

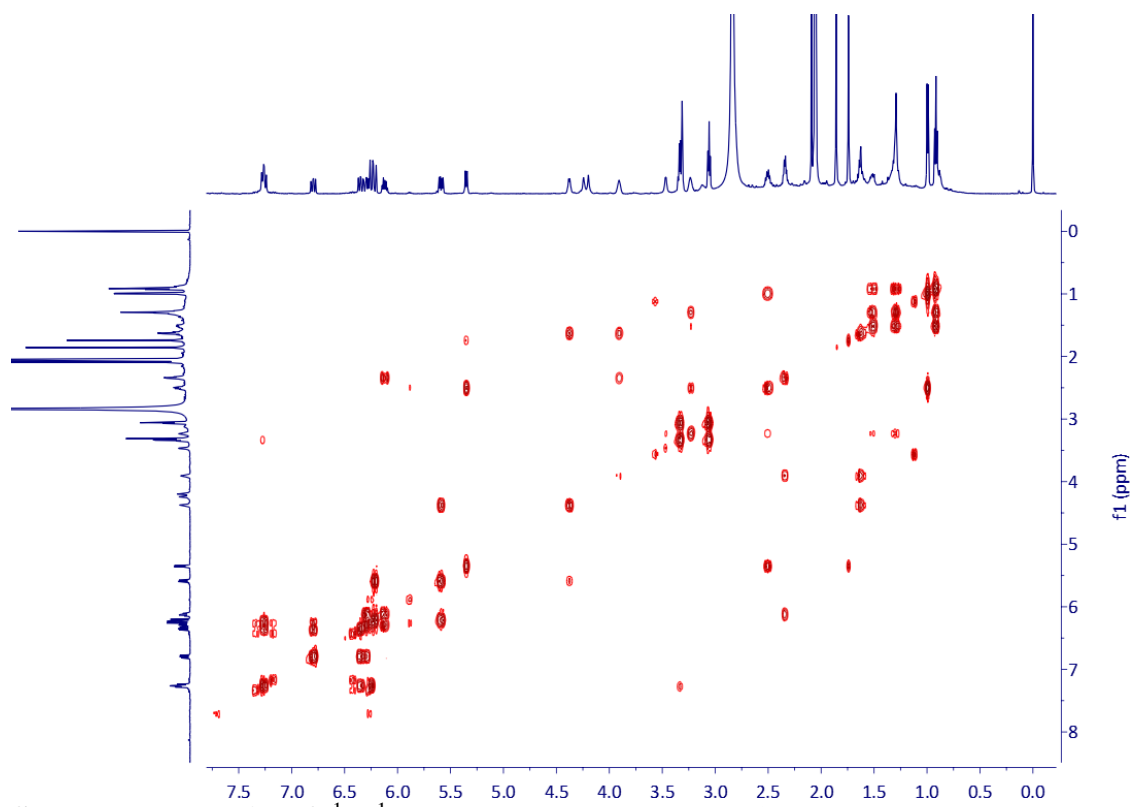

Supplementary Fig. 8f. <sup>1</sup>H-<sup>1</sup>H COSY NMR spectrum of **10** in acetone-*d*<sub>6</sub> (600 MHz).

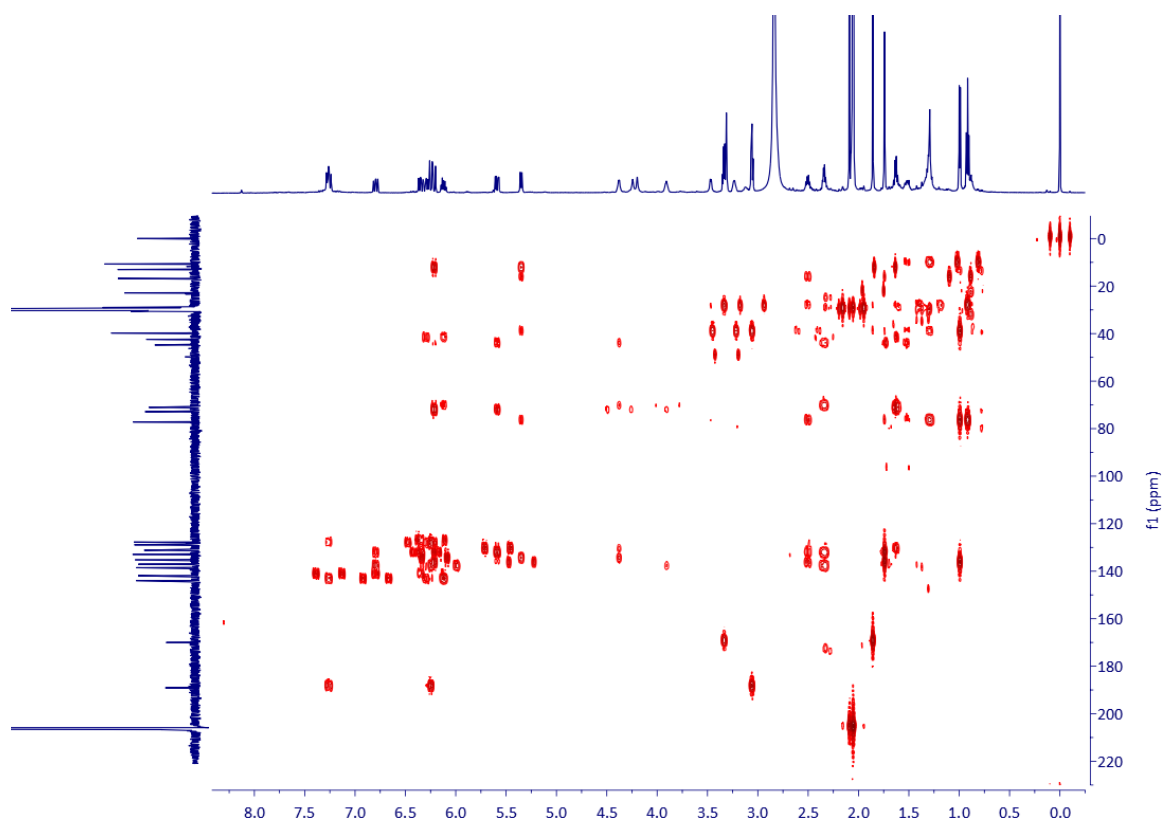

**Supplementary Fig. 8g.** HMBC NMR spectrum of **10** in acetone- $d_6$  (600 MHz).

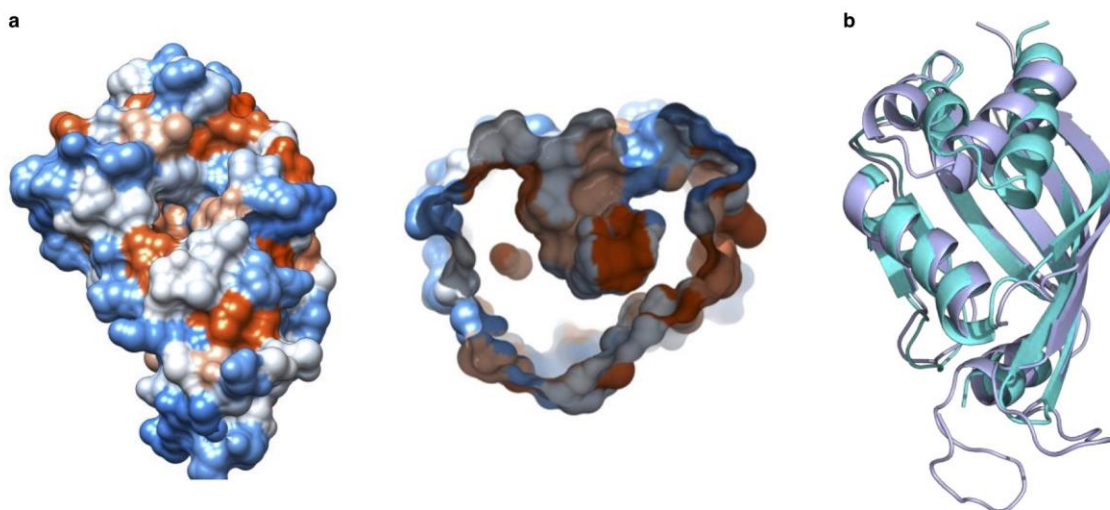

**Supplementary Fig. 9.** Structures of NgnD and comparison with structure of  $\alpha + \beta$  barrel superfamily protein. **(a)** Colored surface of NgnD and transparency NgnD viewed from bottom to reveal the active cavity. The molecular surface was colored by amino acid hydrophobicity according to the Kyte-Doolittle scale, the minimal hydrophobicity was colored dodger blue, while the most hydrophobicity was colored orange red and the zero hydrophobicity was colored as white. **(b)** Superimposed cartoon structure of NgnD and Bal32a (PDB: 1TUH). Chains of NgnD were colored as light blue, and Bal32a was colored as cyan. Proteins of dimeric  $\alpha + \beta$  barrel superfamily are evolutionarily conserved with diverse functions, including monooxygenase in antibiotic biosynthesis<sup>26</sup>, meroterpenoid isomerase<sup>27</sup>, limonene-1,2-epoxide hydrolases<sup>28</sup>, type II polyketide cyclase SnoL<sup>29</sup>, and scytalone dehydratase<sup>30</sup>, all of which share similarities to NgnD with r.m.s. deviations of 1.82–3.33 Å, albeit no sequences similarities.

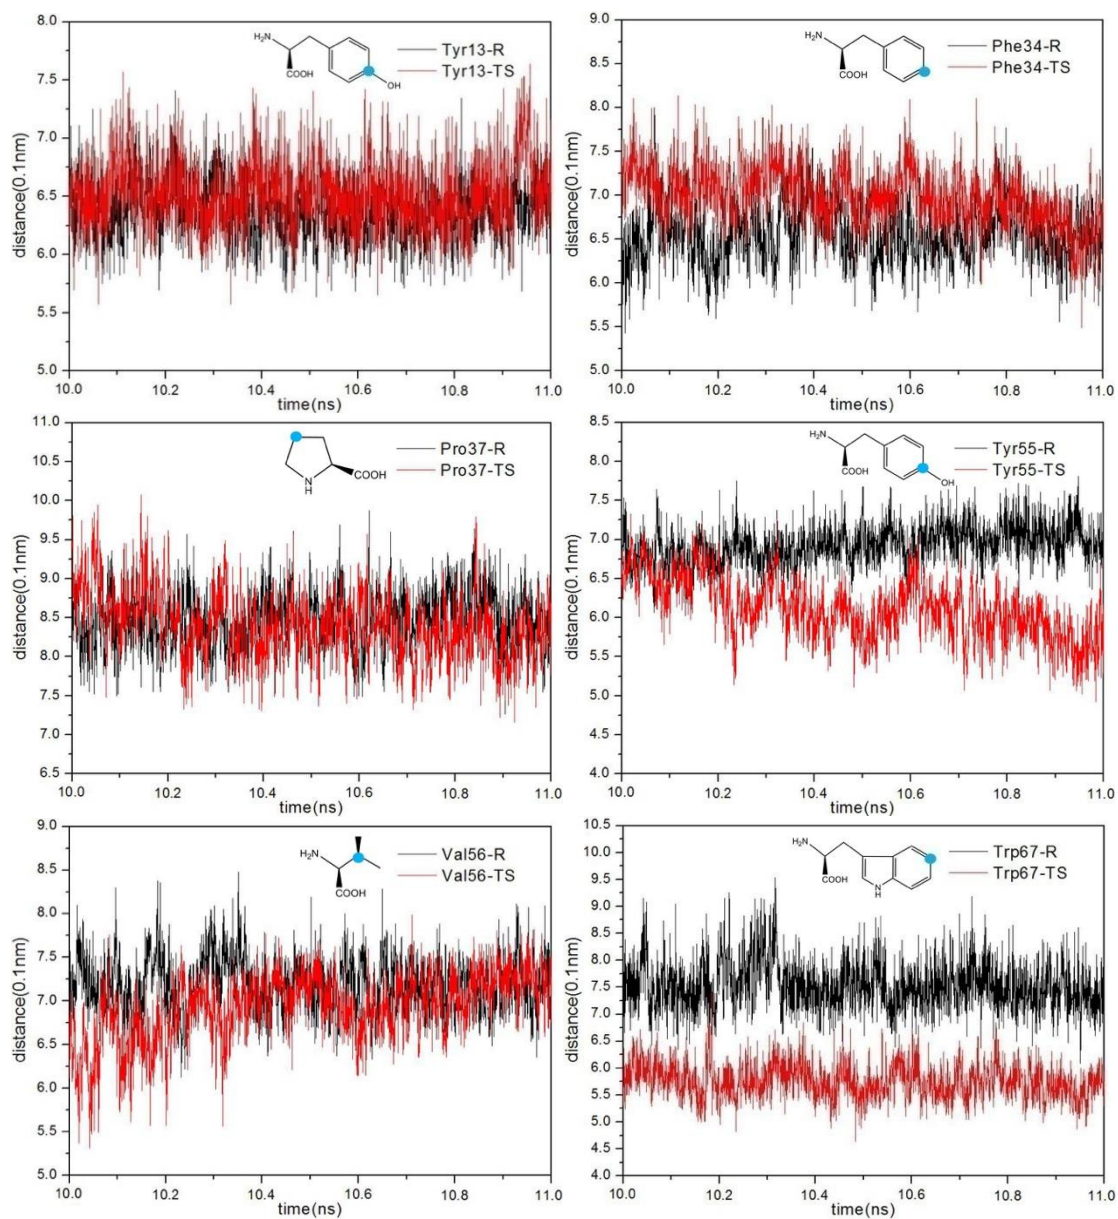

**Supplementary Fig. 10.** Distances between residues (blue dot shown on the structure) and the center of mass of the substrate/TS for the time between 10<sup>th</sup> and 11<sup>th</sup> ns. The black line and the red line represent the reactant and the transition state, respectively.



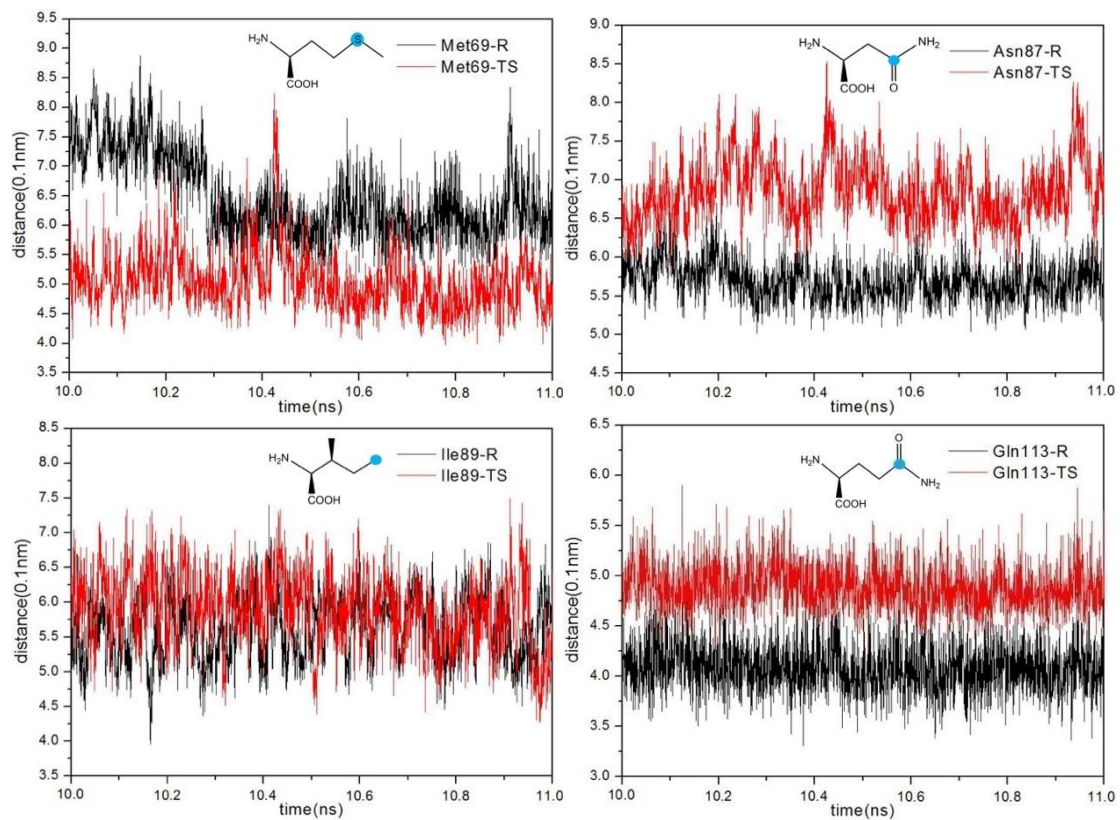

**Supplementary Fig. 10 (cont.).** Distances between residues (blue dot shown on the structure) and the center of mass of the substrate/TS for the time between 10<sup>th</sup> and 11<sup>th</sup> ns. The black line and the red line represent the reactant and the transition state, respectively.

**Supplementary Table 1. Bacterial strains and plasmids.**

| Plasmid/Strain          | Relevant characteristics                                                                              | Reference  |
|-------------------------|-------------------------------------------------------------------------------------------------------|------------|
| <b>Plasmid</b>          |                                                                                                       |            |
| pKC1139                 | <i>E. coli-Streptomyces</i> shuttle plasmid used for gene disruption, temperature sensitive           | 47         |
| pSET152- <i>kasOp</i> * | pSET152 derived plasmid containing the promoter <i>kasOp</i> *                                        | 48         |
| pET-28a(+)              | Protein expression vector used in <i>E. coli</i> , encoding N-terminal His-tag, kanamycin resistance  | Novagen    |
| pET-22b(+)              | Protein expression vector used in <i>E. coli</i> , encoding C-terminal His-tag, ampicillin resistance | Novagen    |
| pHG02001                | pKC1139 derived plasmid for disruption of <i>stmA</i>                                                 | This study |
| pHG02002                | pKC1139 derived plasmid for disruption of <i>stmD</i>                                                 | This study |
| pHG02003                | pKC1139 derived plasmid for disruption of <i>stmD-stmFI</i>                                           | This study |
| pHG02004                | pKC1139 derived plasmid for disruption of <i>stmY-stmFI</i>                                           | This study |
| pHG02005                | pSET152- <i>kasOp</i> * derived plasmid for complementation of <i>stmD</i> in HG02001                 | This study |
| pHG02006                | pSET152- <i>kasOp</i> * derived plasmid for complementation of <i>ngnD</i> in HG02001                 | This study |
| pHG02007                | pET-28a(+) derived plasmid for expressing N-terminal His-tag StmD                                     | This study |
| pHG02008                | pET-28a(+) derived plasmid for expressing N-terminal His-tag NgnD                                     | This study |
| pHG02009                | pET-28a(+) derived plasmid for expressing N-terminal His-tag 101015D                                  | This study |
| pHG02010                | pET-28a(+) derived plasmid for expressing N-terminal His-tag F601D                                    | This study |
| pHG02011                | pET-28a(+) derived plasmid for expressing N-terminal His-tag Root369D                                 | This study |
| pHG02012                | pET-22b(+) derived plasmid for expressing C-terminal His-tag StmD                                     | This study |
| pHG02013                | pET-22b(+) derived plasmid for expressing C-terminal His-tag NgnD                                     | This study |
| pHG02014                | pET-22b(+) derived plasmid for expressing C-terminal His-tag 101015D                                  | This study |
| pHG02015                | pET-22b(+) derived plasmid for expressing C-terminal His-tag NgnD variant (Y13A)                      | This study |
| pHG02016                | pET-22b(+) derived plasmid for expressing C-terminal His-tag NgnD variant (F34Y)                      | This study |
| pHG02017                | pET-22b(+) derived plasmid for expressing C-terminal His-tag NgnD variant (P37A)                      | This study |
| pHG02018                | pET-22b(+) derived plasmid for expressing C-terminal His-tag NgnD variant (Y55A)                      | This study |
| pHG02019                | pET-22b(+) derived plasmid for expressing C-terminal His-tag NgnD variant (Y55F)                      | This study |
| pHG02020                | pET-22b(+) derived plasmid for expressing C-terminal His-tag NgnD variant (V56A)                      | This study |
| pHG02021                | pET-22b(+) derived plasmid for expressing C-terminal His-tag NgnD variant (V56S)                      | This study |
| pHG02022                | pET-22b(+) derived plasmid for expressing C-terminal His-tag NgnD variant (W67A)                      | This study |
| pHG02023                | pET-22b(+) derived plasmid for expressing C-terminal His-tag NgnD variant (M69A)                      | This study |
| pHG02024                | pET-22b(+) derived plasmid for expressing C-terminal His-tag NgnD variant (N87A)                      | This study |
| pHG02025                | pET-22b(+) derived plasmid for expressing C-terminal His-tag NgnD variant (I89A)                      | This study |

|                                     |                                                                                                            |            |
|-------------------------------------|------------------------------------------------------------------------------------------------------------|------------|
| pHG02026                            | pET-22b(+) derived plasmid for expressing C-terminal His-tag NgnD variant (Q113A)                          | This study |
| pHG02027                            | pET-28a(+) derived plasmid for expressing N-terminal His-tag StmC-HACP-TE                                  | This study |
| pHG02028                            | pET-28a(+) derived plasmid for expressing N-terminal His-tag StmC-ACP-TE                                   | This study |
| pHG02029                            | pET-22b(+) derived plasmid for expressing C-terminal His-tag NgnC-TE                                       | This study |
| pHG02030                            | pET-28a(+) derived plasmid for expressing N-terminal His-tag NgnC-ACP-TE                                   | This study |
| pHG02031                            | pET-28a(+) derived plasmid for expressing N-terminal His-tag NgnC-M9-TE                                    | This study |
| pHG02032                            | pSET152- <i>kasOp</i> * derived plasmid for complementation of <i>ngnD</i> ( <i>F34Y/W67A</i> ) in HG02001 | This study |
| pHG02033                            | pET-22b(+) derived plasmid for expressing C-terminal His-tag NgnD variant ( <i>F34A/W67A</i> )             | This study |
| <b><i>E. coli</i> strains</b>       |                                                                                                            |            |
| DH5 $\alpha$                        | General cloning host                                                                                       | 49         |
| BL21 (DE3)                          | Heterologous host for protein expression                                                                   | NEB        |
| ET12567<br>(pUZ8002)                | Methylation-deficient host used for <i>E. coli-Streptomyces</i> intergeneric conjugation                   | 47         |
| <b><i>S. seoulensis</i> strains</b> |                                                                                                            |            |
| A01                                 | Wild type strain for streptoseomycin (STM) production                                                      |            |
| HG02001                             | $\Delta$ <i>stmD</i> , in-frame deletion mutant strain in WT, STM non-producing                            | This study |
| HG02002                             | complementation of $\Delta$ <i>stmD</i> mutant by <i>stmD</i> , STM producing                              | This study |
| HG02003                             | complementation of $\Delta$ <i>stmD</i> mutant by <i>ngnD</i> , STM producing                              | This study |
| HG02004                             | $\Delta$ <i>stmA</i> , in-frame deletion mutant strain in WT, STM non-producing                            | This study |
| HG02005                             | $\Delta$ <i>stmD-stmF1</i> , in-frame deletion mutant strain in WT, STM non-producing                      | This study |
| HG02006                             | $\Delta$ <i>stmY-stmF1</i> , in-frame deletion mutant strain in WT, STM non-producing                      | This study |
| HG02007                             | complementation of $\Delta$ <i>stmD-stmF1</i> mutant by <i>ngnD-F34Y/W67A</i> , STM non-producing          | This study |

**Supplementary Table 2. Oligonucleotide primers used in this study.**

| Oligonucleotide                                                                             | Sequence <sup>a</sup>                                 | Enzyme sites    |
|---------------------------------------------------------------------------------------------|-------------------------------------------------------|-----------------|
| <b>a. for amplification of homologous arms from genomic DNA for gene disruption (5'-3')</b> |                                                       |                 |
| $\Delta$ <i>stmA</i> -UP-F                                                                  | AACGACGGCCAGTGCC <u>AAGCTT</u> CAGTTCATCGGCCAGAAGAT   | <i>Hind</i> III |
| $\Delta$ <i>stmA</i> -UP-R                                                                  | AACGACGGCCAGTGCC <u>AAGCTT</u> CAGTTCATCGGCCAGAAGAT   |                 |
| $\Delta$ <i>stmA</i> -DOWN-F                                                                | ATGGCGACGCCTCATATG                                    |                 |
| $\Delta$ <i>stmA</i> -DOWN-R                                                                | AGCTATGACATGATTAC <u>GAATTC</u> GGTTTCGATGAAGGTGGTGT  | <i>Eco</i> RI   |
| $\Delta$ <i>stmD</i> -UP-F                                                                  | AACGACGGCCAGTGCC <u>AAGCTT</u> CTGGATGACATCGACCGAAAC  | <i>Hind</i> III |
| $\Delta$ <i>stmD</i> -UP-R                                                                  | CGCGGATCAGTAGCGTCGCATGTGTCCTCCGCTTGC                  |                 |
| $\Delta$ <i>stmD</i> -DOWN-F                                                                | CGACGCTACTGATCCGCG                                    |                 |
| $\Delta$ <i>stmD</i> -DOWN-R                                                                | AGCTATGACATGATTAC <u>GAATTC</u> GATCGGCTGCATGTACGACTA | <i>Eco</i> RI   |
| $\Delta$ <i>stmD-stmF1</i> -UP-F                                                            | AACGACGGCCAGTGCC <u>AAGCTT</u> GTGGTCATGTCAGGTGTG     | <i>Hind</i> III |
| $\Delta$ <i>stmD-stmF1</i> -UP-R                                                            | GTGCGCATTGAACTGGACCTGGGTTATCTCAGCCAT                  |                 |
| $\Delta$ <i>stmD-stmF1</i> -DOWN-F                                                          | GTCCAGTTCAATGCGCAC                                    |                 |
| $\Delta$ <i>stmD-stmF1</i> -DOWN-R                                                          | AGCTATGACATGATTAC <u>GAATTC</u> ATCGACTCGGCGAACAC     | <i>Eco</i> RI   |
| $\Delta$ <i>stmY-stmF1</i> -UP-F                                                            | AACGACGGCCAGTGCC <u>AAGCTT</u> CGTTTCGGCCATCCTGTTT    | <i>Hind</i> III |
| $\Delta$ <i>stmY-stmF1</i> -UP-R                                                            | GTGCGCATTGAACTGGACGACGCCTTCGCGTTGATC                  |                 |
| $\Delta$ <i>stmY-stmF1</i> -DOWN-F                                                          | GTCCAGTTCAATGCGCAC                                    |                 |
| $\Delta$ <i>stmY-stmF1</i> -DOWN-R                                                          | AGCTATGACATGATTAC <u>GAATTC</u> ATCGACTCGGCGAACAC     | <i>Eco</i> RI   |
| <b>b. for screening of the correct mutants (5'-3')</b>                                      |                                                       |                 |
| Screen $\Delta$ <i>stmA</i> -F                                                              | AGCCACCGCCCGTGTACC                                    |                 |
| Screen $\Delta$ <i>stmA</i> -R                                                              | GTCCTGGTTGACGGCCGAAC                                  |                 |
| Screen $\Delta$ <i>stmD</i> -F                                                              | AAATAGCTCCGATGGAATCCG                                 |                 |
| Screen $\Delta$ <i>stmD</i> -R                                                              | ATCGAACACCTGGCACTG                                    |                 |
| Screen $\Delta$ <i>stmD-stmF1</i> -F1                                                       | AATGCTTGAACGCGCGAA                                    |                 |
| Screen $\Delta$ <i>stmD-stmF1</i> -R1                                                       | CGCCTTCAGGAAGTAGGAGAC                                 |                 |
| Screen $\Delta$ <i>stmY-stmF1</i> -F1                                                       | TACGGTGCAGCCACTGCT                                    |                 |
| Screen $\Delta$ <i>stmY-stmF1</i> -R1                                                       | AGGTTGACTTCCGCACTACTC                                 |                 |
| Screen $\Delta$ <i>stmD-stmF1</i> -F2                                                       | GCATTTCCCATATTCGAGAGAGA                               |                 |
| Screen $\Delta$ <i>stmD-stmF1</i> -R2                                                       | CGGAGAACAGATAGGTGAAGAAC                               |                 |
| Screen $\Delta$ <i>stmY-stmF1</i> -F2                                                       | GCATTTCCCATATTCGAGAGAGA                               |                 |
| Screen $\Delta$ <i>stmY-stmF1</i> -R2                                                       | CGGAGAACAGATAGGTGAAGAAC                               |                 |
| <b>c. for genes complementation (5'-3')</b>                                                 |                                                       |                 |
| 152- <i>StmD</i> -F                                                                         | TGCTGCATGCATACGT <u>ACTAGT</u> CATTCTCACGGTGTGACC     | <i>Spe</i> I    |
| 152- <i>StmD</i> -R                                                                         | CTATGACATGATTAC <u>GAATTC</u> CCTGGGAACACACGAC        | <i>Eco</i> RI   |

152-NgnD-F TGCTGCATGCATACGTACTAGTGTCTGGAAGCTCTGCGA *SpeI*  
 152-NgnD-R CTATGACATGATTACGAATTCGGCATTGTCCACGGTAGATT *EcoRI*

**d. for protein expression (5'-3')**

28a-StmD-F GTGCCGCGCGGCAGCCCATATGGCTGAGATAACCCAGGAA *NdeI*  
 28a-StmD-R CTCGAGTGC GGCCGCAAAGCTTTCAGTAGCGTCGCTCTCC *HindIII*  
 22b-StmD-F GTGCCGCGCGGCAGCCCATATGGCTGAGATAACCCAGGAA *NdeI*  
 22b-StmD-R CTCGAGTGC GGCCGCAAAGCTTGTAGCGTCGCTCTCCGGC *HindIII*  
 22b-NgnD-F GTGCCGCGCGGCAGCCCATATGACCGAGATCACCCC *NdeI*  
 22b-NgnD-R CTCGAGTGC GGCCGCAAAGCTTGTAGCGGCTTCGCCGTC *HindIII*  
 28a-101015D-F GTGCCGCGCGGCAGCCCATATGACCGAGATCACCCCCGAG *NdeI*  
 28a-101015D-R CTCGAGTGC GGCCGCAAAGCTTTCAGTAGCGGCTTCGCC *HindIII*  
 22b-101015D-F GTGCCGCGCGGCAGCCCATATGACCGAGATCACCCCCGAG *NdeI*  
 22b-101015D-R CTCGAGTGC GGCCGCAAAGCTTGTAGCGGCTTCGCCGTC *HindIII*  
 28a-F601D-F GTGCCGCGCGGCAGCCCATATGACTGAGATCACCCCCGAG *NdeI*  
 28a-F601D-R CTCGAGTGC GGCCGCAAAGCTTTCAGAGGTAGCGACGTTTC *HindIII*  
 28a-Root369D-F GTGCCGCGCGGCAGCCCATATGACCGGATCACCCCCGAG *NdeI*  
 28a-Root369D-R CTCGAGTGC GGCCGCAAAGCTTGCGGTTCTGCGTGTTC *HindIII*  
 28a-StmC-HACPTE-F GTGCCGCGCGGCAGCCCATATGGATCTGCGCAACCGGCTG *NdeI*  
 28a-StmC-HACPTE-R CTCGAGTGC GGCCGCAAAGCTTTCACAGGGTCCCCAGCCA *HindIII*  
 28a-StmC-ACPTE-F GTGCCGCGCGGCAGCCCATATGGTGGAGCGGGACACGCCG *NdeI*  
 28a-StmC-ACPTE-R CTCGAGTGC GGCCGCAAAGCTTTCACAGGGTCCCCAGCCA *HindIII*  
 22b-NgnC-TE-F GTGCCGCGCGGCAGCCCATATGGAAATTGGCACAGACGGCC *NdeI*  
 22b-NgnC-TE-R CTCGAGTGC GGCCGCAAAGCTTTTTCGTCTCTCTTGTTCGGT *HindIII*  
 28a-NgnC-ACPTE-F GTGCCGCGCGGCAGCCCATATGCTGTCCACCCGGCTCGCC *NdeI*  
 28a-NgnC-ACPTE-R CTCGAGTGC GGCCGCAAAGCTTTCATTCGTCTCTCTTGTTC *HindIII*  
 28a-NgnC-M9TE-F GTGCCGCGCGGCAGCCCATATGGACATTGCCGTAGCTGCC *NdeI*  
 28a-NgnC-M9TE-R CTCGAGTGC GGCCGCAAAGCTTTCATTCGTCTCTCTTGTTC *HindIII*

**d. for NgnD site mutation (5'-3')**

NgnD-M69A-F CACGTGGAGCgcaCAGCCCGTCAAGCTG  
 NgnD-M69A-R CCGCCGGAAGCCTCCAGC  
 NgnD-F34Y-F GGACCTGCGCtatCTGGCGCCGG  
 NgnD-F34Y-R TCCGACCAGTACAGCGCG  
 NgnD-V56S-F CATGTCCTATagtCAGGGAATGCTGGAGGCTTC  
 NgnD-V56S-R AAGTCGTGATGCCGACC  
 NgnD-Y13A-F CGCCCGCGCTgcaCAGCCGGTCA

|              |                                       |
|--------------|---------------------------------------|
| NgnD-Y13A-R  | ACCAGTTCGGGGGTGATC                    |
| NgnD-P37A-F  | CTTCCTGGCGgcaGGTAGCCACG               |
| NgnD-P37A-R  | CGCAGGTCCTCCGACCAG                    |
| NgnD-Y55A-F  | CTTCATGTCCgcaGTGCAGGGAATGCTGGAGGCTTCC |
| NgnD-Y55A-R  | TCGTCGATGCCGACCCGC                    |
| NgnD-Y55F-F  | CTTCATGTCCtctGTGCAGGGAATGCTGGAGG      |
| NgnD-Y55F-R  | TCGTCGATGCCGACCCGC                    |
| NgnD-V56A-F  | CATGTCCTATgcaCAGGGAATGCTGG            |
| NgnD-V56A-R  | AAGTCGTCGATGCCGACC                    |
| NgnD-W67A-F  | CGGCGGCACGgcaAGCATGCAGC               |
| NgnD-W67A-R  | GAAGCCTCCAGCATTCCC                    |
| NgnD-N87A-F  | GATCGACGCCgcaCGGATCCACG               |
| NgnD-N87A-R  | GAGTAGCCGTCCTCGTTG                    |
| NgnD-I89A-F  | CGCCAACCGGgcaCACGCGGTAC               |
| NgnD-I89A-R  | TCGATCGAGTAGCCGTCC                    |
| NgnD-Q113A-F | CTCCGGCGTGgcaATGCTCAAGTG              |
| NgnD-Q113A-R | ATATCGAGCACGTCGAAC                    |

---

<sup>a</sup> Letters highlighted in bold are sequences used for ligation independent cloning and the enzyme sites are indicated by underline. Lowercase letter indicated mutated nucleotide.

**Supplementary Table 3. Annotation of the *ngn* cluster<sup>a</sup>.**

| Gene         | Size <sup>b</sup> | Proposed function                                              | homologs <sup>c</sup>   | Identity/Similarity (%/%) |
|--------------|-------------------|----------------------------------------------------------------|-------------------------|---------------------------|
| <i>orf1</i>  | 180               | acetyl-CoA carboxylase biotin carboxyl carrier protein subunit | AccB<br>WP_107660550.1  | 89/93                     |
| <i>orf2</i>  | 363               | GGDEF domain-containing protein                                | ABR67765.1              | 84/88                     |
| <i>orf3</i>  | 479               | peptidase M14                                                  | (WP_107657111.1)        | 96/98                     |
| <i>ngnN2</i> | 325               | keto-acyl ACP-synthase                                         | NgnN2 (AEI59693.1)      | 97/93                     |
| <i>ngnN3</i> | 700               | prolyl carrier protein dehydrogenase                           | NgnN3 (AEI59692.1)      | 96/93                     |
| <i>ngnN4</i> | 520               | proline adenytransferase                                       | NgnN4 (AEI59690.1)      | 92/91                     |
| <i>ngnN5</i> | 91                | proline carrier protein                                        | NgnN5 (AEI59691.1)      | 93/90                     |
| <i>ngnJ</i>  | 315               | LysR family transcriptional regulator                          | WP_040706732.1          | 90/94                     |
| <i>ngnI</i>  | 308               | retinol dehydrogenase                                          | AGC42222.1              | 35/49                     |
| <i>ngnO3</i> | 265               | Phytanoyl-CoA dioxygenase                                      | StmO3 (AWH12930.1)      | 51/66                     |
| <i>ngnP2</i> | 405               | Cytochrome P450                                                | StmP2 (AWH12921.1)      | 41/58                     |
| <i>ngnF</i>  | 65                | ferredoxin                                                     | StmF (AWH12920.1)       | 41/55                     |
| <i>ngnM</i>  | 278               | methyltransferase                                              | StmM2 (AWH12917.1)      | 55/68                     |
| <i>ngnG</i>  | 280               | short-chain dehydrogenase                                      | DC31_16040 (KDA05327.1) | 50/65                     |
| <i>ngnO1</i> | 310               | LLM class flavin-dependent oxidoreductase                      | StmO1 (AWH12914.1)      | 56/66                     |
| <i>ngnO2</i> | 421               | pristinamycin IIA synthase subunit A                           | StmO2 (AWH12915.1)      | 82/90                     |
| <i>ngnP1</i> | 420               | cytochrome P450                                                | StmP1 (AWH12916.1)      | 78/89                     |
| <i>ngnK</i>  | 348               | L-glyceraldehyde 3-phosphate reductase                         | StmK (AWH12918.1)       | 70/82                     |
| <i>ngnA</i>  | 5961              | type I polyketide synthase                                     | StmA (AWH12936.1)       | 68/77                     |
| <i>ngnB</i>  | 4762              | type I polyketide synthase                                     | StmB (AWH12937.1)       | 64/73                     |
| <i>ngnC</i>  | 3663              | type I polyketide synthase                                     | StmC (AWH12938.1)       | 64/74                     |
| <i>ngnD</i>  | 152               | nuclear transport factor 2 family protein                      | StmD (AWH12907.1)       | 86/91                     |
| <i>ngnV</i>  | 259               | thioesterase                                                   | StmV (AWH12931.1)       | 54/67                     |
| <i>orf4</i>  | 1187              | DNA polymerase III subunit alpha                               | DnaE (GAJ85646.1)       | 85/92                     |
| <i>orf5</i>  | 104               | hypothetical protein                                           | WP_107657113.1          | 89/92                     |
| <i>orf6</i>  | 60                | hypothetical protein                                           | WP_040742977.1          | 66/86                     |

<sup>a</sup>The sequence has been deposited in GenBank with accession number MH544245. <sup>b</sup>Numbers are in amino acids. <sup>c</sup>Given in numbers are NCBI accession numbers.

**Supplementary Table 4.** NMR spectroscopic data of compound **4** (acetone-*d*<sub>6</sub>).

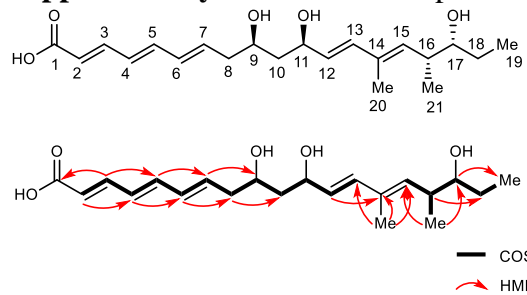

| No. | $\delta_C$            | $\delta_H$ ( <i>J</i> in Hz) | COSY          | HMBC          |
|-----|-----------------------|------------------------------|---------------|---------------|
| 1   | 166.7, C              |                              |               |               |
| 2   | 120.6, CH             | 5.91, d (15.1)               | H3            |               |
| 3   | 144.9, CH             | 7.29, dd (15.1, 11.4)        | H2, H4        | 1, 2, 4, 5    |
| 4   | 128.3, CH             | 6.36, dd (14.9, 11.4)        | H3, H5        | 2, 3          |
| 5   | 140.9, CH             | 6.68, dd (14.9, 10.8)        | H4, H6        | 3, 6, 7       |
| 6   | 131.9, CH             | 6.27, dd (15.1, 10.8)        | H5, H7        | 8             |
| 7   | 136.6, CH             | 6.07, dt (15.1, 7.4)         | H6, H8        | 5, 8, 9       |
| 8   | 41.5, CH <sub>2</sub> | 2.33, m                      | H7, H9        | 6, 7, 9, 10   |
| 9   | 70.2, CH              | 3.90, m                      | H8, H10       | 7             |
| 10  | 43.8, CH <sub>2</sub> | 1.62, m                      | H9, H11       | 8, 9, 11, 12  |
| 11  | 72.0, CH <sub>2</sub> | 4.38, dd (12.4, 6.6)         | H10, H12      | 9, 10, 12, 13 |
| 12  | 130.3, CH             | 5.59, dd (15.7, 6.6)         | H11, H13      | 10, 11, 13    |
| 13  | 134.3, CH             | 6.22, d (15.7)               | H12           | 11, 15        |
| 14  | 132.0, C              |                              |               |               |
| 15  | 136.1, CH             | 5.35, d (9.9)                | H16           | 13            |
| 16  | 38.9, CH              | 2.50, ddt (13.5, 9.9, 6.7)   | H15, H17, H21 | 14, 15, 17    |
| 17  | 76.3, CH              | 3.23, m                      | H16, H18      |               |
| 18  | 27.9, CH <sub>2</sub> | 1.28, m<br>1.50, m           | H17, H19      | 16, 17, 19    |
| 19  | 9.8, CH <sub>3</sub>  | 0.91, t (7.4)                | H18           | 17, 18        |
| 20  | 12.1, CH <sub>3</sub> | 1.74, d (0.9)                |               | 14, 15,       |
| 21  | 15.9, CH <sub>3</sub> | 0.99, d (6.7)                | H16           | 16, 17        |



**Supplementary Table 5.** NMR spectroscopic data of compound **5** (acetone-*d*<sub>6</sub>).

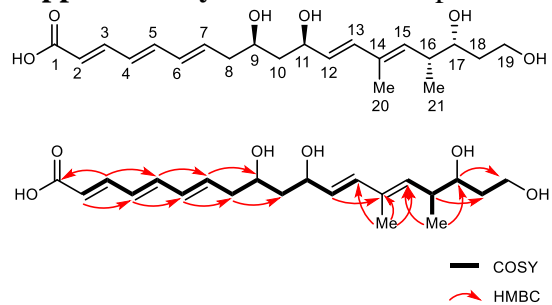

| No. | $\delta_C$            | $\delta_H$ ( <i>J</i> in Hz) | COSY     | HMBC           |
|-----|-----------------------|------------------------------|----------|----------------|
| 1   | 167.0, C              |                              |          |                |
| 2   | 120.5, CH             | 5.88, d (15.1)               | H3       |                |
| 3   | 144.8, CH             | 7.29, dd (15.1, 11.3)        | H2, H4   | 1, 2, 4, 5     |
| 4   | 128.3, CH             | 6.35, dd (14.9, 11.3)        | H3, H5   | 2, 3           |
| 5   | 140.9, CH             | 6.67, dd (14.9, 10.6)        | H4, H6   | 3, 6           |
| 6   | 131.9, CH             | 6.26, dd (15.0, 10.6)        | H5, H7   | 8              |
| 7   | 136.6, CH             | 6.05, dt (15.0, 7.4)         | H6, H8   | 5              |
| 8   | 41.5, CH <sub>2</sub> | 2.31, t (6.6)                | H7, H9   | 6, 7, 9, 10    |
| 9   | 70.2, CH              | 3.89, m                      | H8, H10  | 7              |
| 10  | 43.8, CH <sub>2</sub> | 1.62, m                      | H9, H11  | 8, 9, 11, 12   |
| 11  | 72.0, CH <sub>2</sub> | 4.38, dd (12.9, 6.6)         | H10, H12 | 9, 10, 12, 13  |
| 12  | 130.4, CH             | 5.58, dd (15.5, 6.6)         | H11, H13 | 10, 11, 13     |
| 13  | 134.3, CH             | 6.22, d (15.5)               | H12      | 11             |
| 14  | 132.3, C              |                              |          |                |
| 15  | 135.8, CH             | 5.34, d (9.9)                | H16      | 13, 16, 17     |
| 16  | 39.5, CH              | 2.50, m                      | H15, H17 | 14, 15, 17, 18 |
| 17  | 74.0, CH              | 3.54, ddd (9.5, 7.3, 2.4)    | H16, H18 |                |
| 18  | 37.4, CH <sub>2</sub> | 1.51, m                      | H17, H19 | 16, 17, 19     |
|     |                       | 1.66, m                      |          |                |
| 19  | 60.2, CH <sub>2</sub> | 3.70, m                      | H18      | 17, 18         |
| 20  | 12.3, CH <sub>3</sub> | 1.74, d (1.0)                |          | 14, 15         |
| 21  | 15.9, CH <sub>3</sub> | 1.0, d (6.7)                 | H16      | 16, 17         |

**Supplementary Table 6.** NMR spectroscopic data of **6** (acetone-*d*<sub>6</sub>).

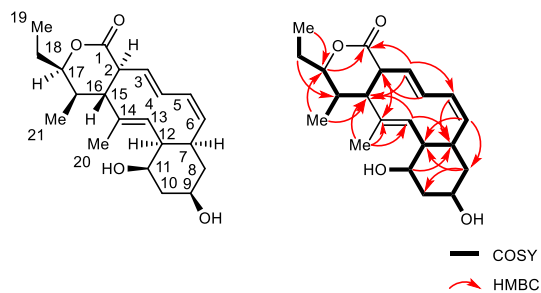

| No. | $\delta_C$            | $\delta_H$ (J in Hz)       | COSY           | HMBC                 |
|-----|-----------------------|----------------------------|----------------|----------------------|
| 1   | 173.0, C              |                            |                |                      |
| 2   | 46.3, CH              | 3.09, dd (11.0, 8.5)       | H3, H15        | 1, 3, 4, 14, 15      |
| 3   | 122.4, CH             | 5.23, dd (16.7, 8.5)       | H2, H4         | 1, 2, 5              |
| 4   | 134.0, CH             | 5.53, dd (16.7, 8.7)       | H3, H5         | 2, 3, 6              |
| 5   | 126.1, CH             | 6.16, t (10.2)             | H4, H6         | 3, 4, 7              |
| 6   | 135.1, CH             | 6.26, m                    | H5, H7         | 4, 5, 7              |
| 7   | 33.9, CH              | 2.94, m                    | H6, H8, H12    | 4, 5, 8, 9, 11, 12   |
| 8   | 35.6, CH <sub>2</sub> | 2.14, m                    | H7, H9         | 6, 9, 12             |
|     |                       | 1.95, ddd (14.4, 5.5, 3.1) |                | 5, 6, 7, 9, 12,      |
| 9   | 67.2, CH              | 4.25, m                    | H8, H10, 9OH   | 7, 10, 11            |
| 10  | 37.8, CH <sub>2</sub> | 2.18, m                    | H9, H11        | 8, 9, 12             |
|     |                       | 1.79, dt (14.3, 2.8)       |                | 9, 11, 12,           |
| 11  | 69.8, CH              | 3.80, m                    | H10, H12, 11OH | 7, 9, 10, 12,        |
| 12  | 47.1, CH              | 2.85, m                    | H11, H13       | 7, 11, 6, 13         |
| 13  | 137.7, CH             | 4.97, d (10)               | H12            | 11, 15, 20           |
| 14  | 130.6, C              |                            |                |                      |
| 15  | 58.9, CH              | 1.40, dd (11.1, 4.2)       | H2, H16        | 2, 3, 13, 16, 17, 21 |
| 16  | 32.2, CH              | 2.38, m                    | H15, H17       | 2, 15, 21            |
| 17  | 80.3, CH              | 4.41, ddd (8.4, 4.7, 3.5)  | H16, H18       | 15, 18, 19, 21       |
| 18  | 24.3, CH <sub>2</sub> | 1.71, m                    | H17, H19       | 16, 17, 19           |
|     |                       | 1.63, m                    |                | 17, 19               |
| 19  | 9.8, CH <sub>3</sub>  | 1.02, t (7.4)              | H18            | 17, 18               |
| 20  | 11.4, CH <sub>3</sub> | 1.67, br s                 |                | 13, 14, 15           |
| 21  | 14.5, CH <sub>3</sub> | 0.93, d (7.1)              | H16            | 15, 16, 17           |
|     | 9-OH                  | 4.59, d (4.8)              | H9             | 8, 9, 10             |
|     | 11-OH                 | 3.88, d (8.3)              | H11            | 10, 11, 12           |

**Supplementary Table 7.** NMR spectroscopic data of compound **7** (acetonitrile- $d_3$ ).

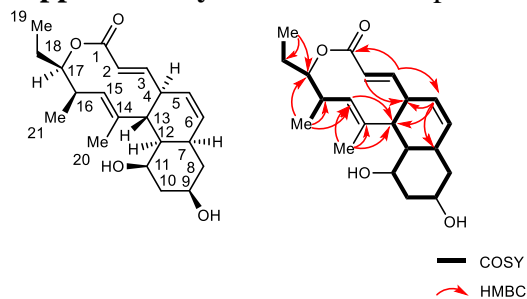

| No. | $\delta_C$             | $\delta_H$ ( $J$ in Hz)    | COSY          | HMBC       |
|-----|------------------------|----------------------------|---------------|------------|
| 1   | 170.0, C               |                            |               |            |
| 2   | 125.60, CH             | 5.85, d (16.2)             | H3            | 1, 3, 4    |
| 3   | 145.95, CH             | 5.63, dd (16.2, 10.0)      | H2, H4        | 1          |
| 4   | 47.94, CH              | 2.62, t (10.0)             | H3, H5, H13   |            |
| 5   | 126.28, CH             | 5.75, br d (10.0)          | H4, H6        | 3,4, 7, 13 |
| 6   | 133.50, CH             | 5.82, ddd (10.0, 5.2, 2.2) | H5, H7        |            |
| 7   | 35.58, CH              | 2.13, m                    | H6, H8, H12   |            |
| 8   | 39.38, CH <sub>2</sub> | 1.11, m                    | H7, H9        |            |
| 9   | 69.27, CH              | 3.54, m                    | H8, H10       |            |
| 10  | 40.16, CH <sub>2</sub> | 1.80, m<br>1.34, m         | H9, H11       |            |
| 11  | 72.22, CH              | 3.69, m                    | H10, H12      |            |
| 12  | 39.64, CH              | 2.33, m                    | H7, H11, H13  |            |
| 13  | 48.04, CH              | 1.93, m                    | H4, H12       |            |
| 14  | 136.4, C               |                            |               |            |
| 15  | 137.39, CH             | 4.51, d (8.1)              | H16           | 13         |
| 16  | 37.11, CH              | 2.72, m                    | H15, H17, H21 |            |
| 17  | 84.20, CH              | 4.50, m                    | H16, H18      |            |
| 18  | 26.9, CH <sub>2</sub>  | 1.56, m<br>1.70, m         | H19           |            |
| 19  | 11.6, CH <sub>3</sub>  | 0.95, t (7.4)              | H18           | 17, 18     |
| 20  | 12.73, CH <sub>3</sub> | 1.61, br s                 |               | 13         |
| 21  | 12.4, CH <sub>3</sub>  | 0.97, d (7.0)              | H16           | 15, 16, 17 |

**Supplementary Table 8.** Experimental and calculated  $^{13}\text{C}$  NMR data for compound **7** (acetonitrile- $d_3$ ). Regression line is indicated for experimental measured  $^{13}\text{C}$  NMR data (x axis) correlated with computed chemical shift (y axis) with correlation coefficient  $R^2 = 0.9995$ , which is calculated in Excel.

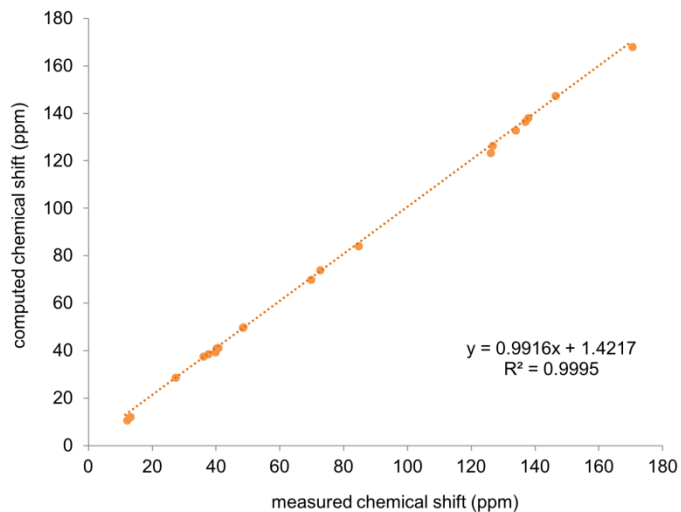

| No. | Observed $\delta_{\text{C}}$ | Calculated $\delta_{\text{C}}$ |
|-----|------------------------------|--------------------------------|
| 1   | 170.0, C                     | 168.4                          |
| 2   | 125.60, CH                   | 123.8                          |
| 3   | 145.95, CH                   | 147.8                          |
| 4   | 47.94, CH                    | 50.1                           |
| 5   | 126.28, CH                   | 126.8                          |
| 6   | 133.50, CH                   | 133.2                          |
| 7   | 35.58, CH                    | 37.9                           |
| 8   | 39.38, CH <sub>2</sub>       | 39.8                           |
| 9   | 69.27, CH                    | 70.4                           |
| 10  | 40.16, CH <sub>2</sub>       | 41.6                           |
| 11  | 72.22, CH                    | 74.3                           |
| 12  | 39.64, CH                    | 41.4                           |
| 13  | 48.04, CH                    | 50.3                           |
| 14  | 136.4, C                     | 136.8                          |
| 15  | 137.39, CH                   | 138.5                          |
| 16  | 37.11, CH                    | 38.9                           |
| 17  | 84.20, CH                    | 84.4                           |
| 18  | 26.9, CH <sub>2</sub>        | 29.0                           |
| 19  | 11.6, CH <sub>3</sub>        | 11.0                           |
| 20  | 12.73, CH <sub>3</sub>       | 12.4                           |
| 21  | 12.4, CH <sub>3</sub>        | 12.3                           |

**Supplementary Table 9.** NMR spectroscopic data of compound **8** (acetone-*d*<sub>6</sub>).

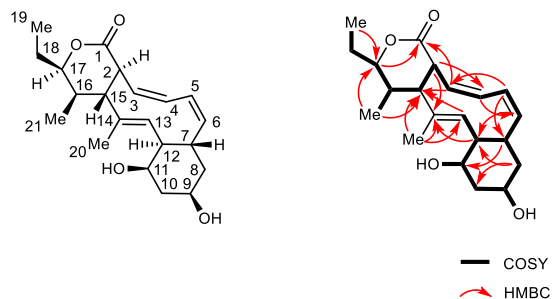

| No. | $\delta$ C            | $\delta$ H (J in Hz)       | COSY              | HMBC                  |
|-----|-----------------------|----------------------------|-------------------|-----------------------|
| 1   | 172.6, C              |                            |                   |                       |
| 2   | 42.4, CH              | 3.19, t (9.7)              | H3, H15           | 1, 3, 4, 14           |
| 3   | 128.4, CH             | 5.57, ddd (11.1, 8.3, 1.4) | H2, H4            | 1, 2, 5               |
| 4   | 129.5, CH             | 6.19, ddd (11.1, 4.3, 1.4) | H3, H5            | 2, 5, 6               |
| 5   | 126.7, CH             | 5.88, dd (11.0, 4.3)       | H4, H6            | 3, 6, 7, 12           |
| 6   | 136.8, CH             | 5.23, ddd (11.0, 8.4, 1.3) | H5, H7            | 4, 7, 8               |
| 7   | 32.6, CH              | 2.61, m                    | H6, H8, H12       | 5, 6, 8, 12           |
| 8   | 38.5, CH <sub>2</sub> | 2.02, m                    | H7, H9            | 6, 7, 9, 10, 12       |
|     |                       | 1.58, m                    |                   | 7, 12                 |
| 9   | 66.7, CH              | 4.17, br s                 | H8, H10, 9OH      |                       |
| 10  | 36.7, CH <sub>2</sub> | 2.10, m                    | H9, H11           | 7, 8, 9, 11, 12       |
|     |                       | 1.68, m                    |                   | 8                     |
| 11  | 68.9, CH              | 3.92, m                    | H10, H12,<br>11OH |                       |
| 12  | 46.5, CH              | 2.11, m                    | H11, H13          | 6, 14                 |
| 13  | 129.7, CH             | 5.29, d (10.4)             | H12               | 11, 15, 20            |
| 14  | 131.9 C               |                            |                   |                       |
| 15  | 55.7, CH              | 1.69, m                    | H2, H16           |                       |
| 16  | 33.0, CH              | 2.25, m                    | H15, H17          | 2, 12, 14, 15, 18, 21 |
| 17  | 80.3, CH              | 4.39, ddd (8.1, 5.1, 2.6)  | H16, H18          | 1, 15, 18, 19, 21     |
| 18  | 24.3, CH <sub>2</sub> | 1.63, m                    | H17, H19          | 16, 17                |
|     |                       | 1.68, m                    |                   | 16, 17, 19            |
| 19  | 9.73, CH <sub>3</sub> | 1.00, t (7.4)              | H18               | 17, 18                |
| 20  | 12.9, CH <sub>3</sub> | 1.55, d (0.9)              |                   | 2, 12, 13, 14, 15     |
| 21  | 14.0, CH <sub>3</sub> | 0.91, d (7.1)              | H16               | 15, 16, 17            |
|     | 9-OH                  | 4.55, d (3.8)              | H9                |                       |
|     | 11-OH                 | 4.45, d (7.8)              | H11               | 10, 11                |

**Supplementary Table 10.** NMR spectroscopic data of compound **10** (acetone-*d*<sub>6</sub>).

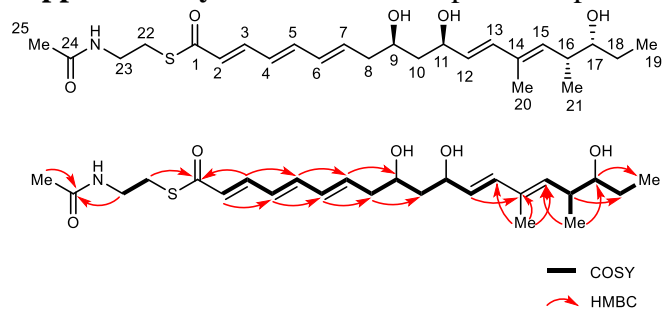

| No.   | $\delta$ C            | $\delta$ H (J in Hz)  | HMBC             |
|-------|-----------------------|-----------------------|------------------|
| 1     | 189.1, C              |                       |                  |
| 2     | 127.8, CH             | 6.24, d (15.3)        |                  |
| 3     | 141.8, CH             | 7.25, dd (15.3, 11.3) | 1, 2, 4, 5       |
| 4     | 128.8, CH             | 6.34, dd (14.9, 11.3) | 2, 3             |
| 5     | 143.9, CH             | 6.79, dd (14.9, 11.0) | 3                |
| 6     | 132.9, CH             | 6.29, dd (15.2, 11.0) | 8                |
| 7     | 138.5, CH             | 6.12, m               | 5, 8, 9          |
| 8     | 42.4, CH <sub>2</sub> | 2.34, m               | 6, 7, 9, 10      |
| 9     | 71.1, CH              | 3.90, m               | 7                |
| 10    | 44.7, CH <sub>2</sub> | 1.65, m               | 8, 9, 11, 12     |
| 11    | 72.9, CH              | 4.37, dd (12.4, 6.4)  | 9, 10, 12,<br>13 |
| 12    | 131.2, CH             | 5.58, dd (15.6, 6.4)  | 10, 11, 14       |
| 13    | 135.2, CH             | 6.21, d (15.8)        | 11, 15           |
| 14    | 132.9, C              |                       |                  |
| 15    | 137.1, CH             | 5.34, d (9.8)         | 13, 16, 17       |
| 16    | 39.7, CH              | 2.49, m               | 14, 17, 18       |
| 17    | 77.2, CH              | 3.22, m               |                  |
| 18    | 22.3, CH <sub>2</sub> | 1.29, m<br>1.50, m    | 16, 17           |
| 19    | 10.7, CH <sub>3</sub> | 0.91, t (7.4)         | 18, 19           |
| 20    | 13.0, CH <sub>3</sub> | 1.74, s               | 14, 15           |
| 21    | 16.8, CH <sub>3</sub> | 0.99, d (6.7)         | 16, 17           |
| 22    | 39.7, CH <sub>2</sub> | 3.06, t(6.8)          | 1, 23            |
| 23    | 39.7, CH <sub>2</sub> | 3.33, m               | 22, 24           |
| 24    | 169.9, C              |                       |                  |
| 25    | 22.8, CH <sub>3</sub> | 1.86, s               | 24               |
| 9-OH  |                       | 4.24, br s            |                  |
| 11-OH |                       | 4.19, br s            |                  |

**Supplementary Table 11.** Annotation of the *stmD* homologue and its neighboring genes in *N. tenerifensis* NBRC 101015.

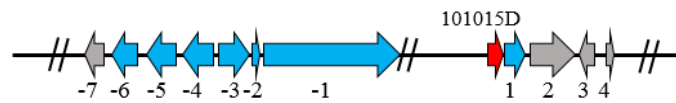

| Protein | Size (aa) | Proposed function                         | Homolog                      | Identity/similarity, (%/%) |
|---------|-----------|-------------------------------------------|------------------------------|----------------------------|
| Orf_-7  | 283       | hypothetical protein                      | TU76_02335<br>(KMN02617.1)   | 53/72                      |
| Orf_-6  | 324       | LLM class flavin-dependent oxidoreductase | StmO1<br>(AWH12914.1)        | 53/64                      |
| Orf_-5  | 421       | pristinamycin IIA synthase subunit A      | StmO2<br>(AWH12915.1)        | 82/90                      |
| Orf_-4  | 423       | cytochrome P450                           | StmP1<br>(AWH12916.1)        | 75/87                      |
| Orf_-3  | 394       | cytochrome P450                           | StmP3<br>(AWH12925.1)        | 76/86                      |
| Orf_-2  | 63        | ferredoxin                                | StmF1<br>(AWH12935.1)        | 76/87                      |
| Orf_-1  | 2771      | type I polyketide synthase                | StmC<br>(AWH12938.1)         | 47/58                      |
| 101015D | 152       | nuclear transport factor 2 family protein | StmD<br>(AWH12907.1)         | 82/90                      |
| Orf_1   | 256       | thioesterase                              | StmV<br>(AWH12931.1)         | 50/63                      |
| Orf_2   | 1214      | DNA polymerase III subunit alpha          | WP_081869253.1               | 86/93                      |
| Orf_3   | 112       | hypothetical protein                      | CLV40_101308<br>(PPK71119.1) | 58/67                      |
| Orf_4   | 59        | hypothetical protein                      | WP_043660705.1               | 58/72                      |

<sup>a</sup>Given in numbers are NCBI accession numbers. Gene marked in red is the homolog of *stmD*; genes marked in blue is those conserved in *stm* or *ngn* gene cluster.

**Supplementary Table 12.** Annotation of the *stmD* homologue and its neighboring genes in *S. tsukubaensis* F601.

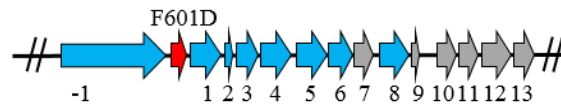

| Protein | Size (aa) | Proposed function                         | Homolog               | Identity/similarity, (%/%) |
|---------|-----------|-------------------------------------------|-----------------------|----------------------------|
| Orf_-1  | 1229      | type I polyketide synthase                | StmC<br>(AWH12938.1)  | 61/50                      |
| F601D   | 153       | nuclear transport factor 2 family protein | StmD<br>(AWH12907.1)  | 78/88                      |
| Orf_1   | 398       | cytochrome P450                           | StmP3<br>(AWH12925.1) | 73/83                      |
| Orf_2   | 47        | ferredoxin                                | StmF1<br>(AWH12935.1) | 53/70                      |
| Orf_3   | 276       | SAM-dependent methyltransferase           | StmM2<br>(AWH12917.1) | 55/69                      |
| Orf_4   | 439       | cytochrome P450                           | StmP1<br>(AWH12916.1) | 74/87                      |
| Orf_5   | 436       | pristinamycin IIA synthase subunit A      | StmO2<br>(AWH12915.1) | 78/87                      |
| Orf_6   | 351       | LLM class flavin-dependent oxidoreductase | StmO1<br>(AWH12914.1) | 48/56                      |
| Orf_7   | 246       | SDR family oxidoreductase                 | WP_040742805.1        | 76/86                      |
| Orf_8   | 401       | cytochrome P450                           | StmP4<br>(AWH12932.1) | 40/55                      |
| Orf_9   | 75        | ferredoxin                                | WP_091433785.1        | 61/77                      |
| Orf_10  | 228       | TetR family transcriptional regulator     | WP_098010282.1        | 48/62                      |
| Orf_11  | 277       | hypothetical protein                      | WP_058940059.1        | 54/68                      |
| Orf_12  | 425       | Cytochrome P450                           | WP_083895055.1        | 63/75                      |
| Orf_13  | 280       | <i>O</i> -methyltransferase               | SnogM<br>(AAG42853.1) | 43/60                      |

<sup>a</sup>Given in numbers are NCBI accession numbers. Gene marked in red is the homologue of *stmD*; genes marked in blue is those conserved in *stm* or *ngn* gene cluster.



**Supplementary Table 13.** Annotation of the *stmD* homologue and its neighboring genes in *S.* sp. Root369.

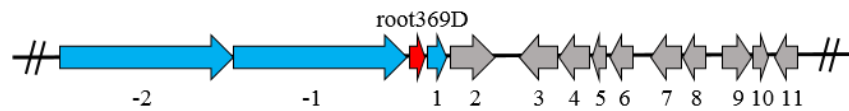

| Protein  | Size (aa) | Proposed function                                | Homolog                     | Identity/similarity, (%/%) |
|----------|-----------|--------------------------------------------------|-----------------------------|----------------------------|
| Orf_-2   | 3606      | type I polyketide synthase                       | StmB<br>(AWH12937.1)        | 47/59                      |
| Orf_-1   | 3858      | type I polyketide synthase                       | StmC<br>(AWH12938.1)        | 52/63                      |
| root369D | 151       | nuclear transport factor 2 family protein        | StmD<br>(AWH12907.1)        | 48/66                      |
| Orf_1    | 278       | thioesterase                                     | StmV<br>(AWH12931.1)        | 49/64                      |
| Orf_2    | 642       | monooxygenase                                    | ASD17_03920<br>(KQX23592.1) | 51/68                      |
| Orf_3    | 507       | aldehyde dehydrogenase                           | QR97_20565<br>(AKN71864.1)  | 94/97                      |
| Orf_4    | 426       | transcriptional regulator                        | AQI94_17755<br>(KUM87198.1) | 93/95                      |
| Orf_5    | 199       | N-acetylmuramoyl-L-alanine amidase               | CLW08_0629<br>(PKB34464.1)  | 75/85                      |
| Orf_6    | 337       | acetamidase                                      | SZN_09603<br>(EGX60014.1)   | 94/97                      |
| Orf_7    | 402       | ROK domain-containing protein                    | SSEG_09798<br>(EDY59080.1)  | 95/96                      |
| Orf_8    | 481       | xylulose kinase                                  | ABB07_32890<br>(AKJ14687.1) | 92/95                      |
| Orf_9    | 388       | xylose isomerase                                 | DF19_25540<br>(KDN75320.1)  | 95/97                      |
| Orf_10   | 149       | hypothetical protein                             | WP_079163039.1              | 96/99                      |
| Orf_11   | 446       | esterase-like activity of phytase family protein | SLINC_1292<br>(ANS63516.1)  | 87/92                      |

<sup>a</sup>Given in numbers are NCBI accession numbers. Gene marked in red is the homolog of *stmD*; genes marked in blue is those conserved in *stm* or *ngn* gene cluster.

**Supplementary Data 1.** DFT-computed energies and Cartesian coordinates.

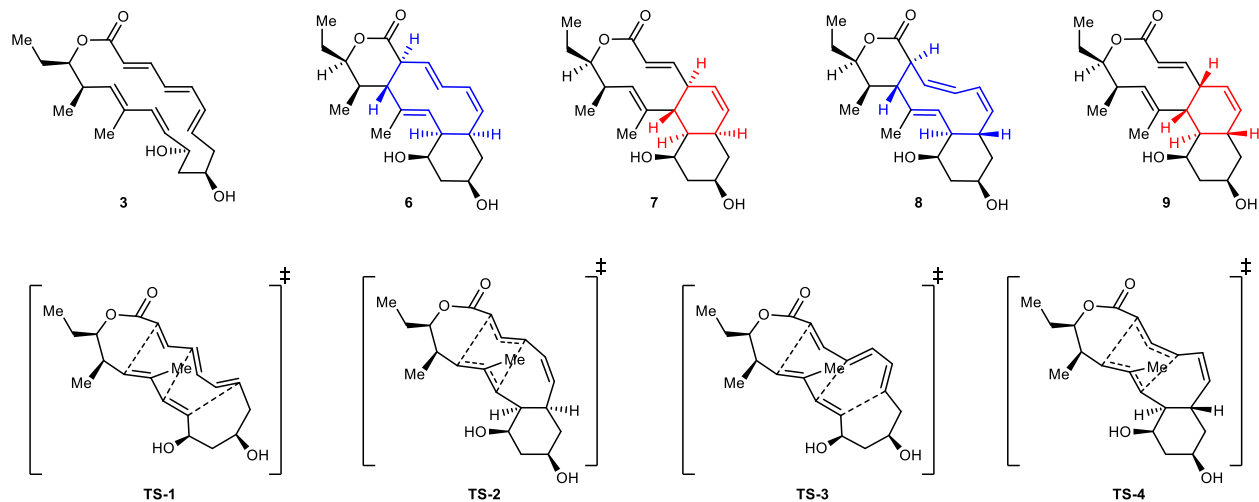

| Gibbs free energies (in kcal/mol) | B3LYP-D3/6-31G(d) | CPCM(water)-B3LYP-D3/6-311+G(d,p)//B3LYP-D3/6-31G(d) | CPCM(water)-M06-2X/6-311+G(d,p)//B3LYP-D3/6-31G(d) | CPCM(water)- $\omega$ B97XD/6-311+G(d,p)//B3LYP-D3/6-31G(d) |
|-----------------------------------|-------------------|------------------------------------------------------|----------------------------------------------------|-------------------------------------------------------------|
| <b>TS-1</b>                       | 21.1              | 21.1                                                 | <b>23.1</b>                                        | 24.1                                                        |
| <b>TS-2</b>                       | 9.5               | 11.3                                                 | <b>5.6</b>                                         | 6.1                                                         |
| <b>TS-3</b>                       | 21.4              | 21.5                                                 | <b>23.0</b>                                        | 24.0                                                        |
| <b>TS-4</b>                       | 9.4               | 11.5                                                 | <b>5.9</b>                                         | 6.3                                                         |
| <b>6</b>                          | -9.4              | -6.5                                                 | <b>-19.1</b>                                       | -20.9                                                       |
| <b>7</b>                          | -5.2              | -4.2                                                 | <b>-16.7</b>                                       | -19.1                                                       |
| <b>8</b>                          | -15.1             | -12.2                                                | <b>-25.5</b>                                       | -27.4                                                       |
| <b>9</b>                          | -4.0              | -1.1                                                 | <b>-13.7</b>                                       | -15.9                                                       |

**3**

$G_{\text{water}} = -1118.553272$  Hartree

|   |           |           |           |
|---|-----------|-----------|-----------|
| C | -4.838327 | 0.340397  | 2.574520  |
| C | -4.045270 | -0.717842 | 1.801237  |
| C | -3.893228 | -0.373560 | 0.321884  |
| C | -3.155840 | -1.427967 | -0.549512 |
| C | -1.734781 | -1.680686 | -0.110544 |
| C | -0.585285 | -1.339447 | -0.735490 |
| C | 0.690352  | -1.783993 | -0.154947 |
| C | 1.918221  | -1.588625 | -0.668248 |
| C | 3.597022  | 1.929025  | 1.109610  |
| C | 2.725743  | 2.608134  | 0.334959  |
| C | 1.316817  | 2.644578  | 0.639154  |
| C | 0.332314  | 2.978962  | -0.233999 |
| C | -1.004587 | 2.486189  | -0.037564 |
| C | -1.994173 | 2.490638  | -0.959209 |

|   |           |           |           |
|---|-----------|-----------|-----------|
| C | -3.145902 | 1.579917  | -0.870997 |
| C | -3.945880 | -2.750857 | -0.598032 |
| C | 3.195945  | -2.112719 | -0.042304 |
| C | 3.963506  | -1.029221 | 0.734162  |
| C | 4.602454  | 0.045335  | -0.149454 |
| C | 4.897467  | 1.368818  | 0.619655  |
| C | -0.517703 | -0.544982 | -2.018510 |
| O | -3.951007 | 1.409273  | -1.770405 |
| O | -3.146293 | 0.865360  | 0.286128  |
| O | 2.952035  | -3.150041 | 0.908349  |
| O | 5.793003  | -0.529045 | -0.683678 |
| H | -4.343644 | 1.314521  | 2.515243  |
| H | -4.933641 | 0.066545  | 3.630924  |
| H | -5.848847 | 0.452113  | 2.162697  |
| H | -3.047120 | -0.834391 | 2.241062  |
| H | -4.546816 | -1.689202 | 1.882139  |
| H | -4.877548 | -0.193716 | -0.126755 |
| H | -3.163732 | -1.013569 | -1.560944 |
| H | -1.642943 | -2.253284 | 0.814440  |
| H | 0.618266  | -2.347839 | 0.775192  |
| H | 2.045538  | -1.028818 | -1.592556 |
| H | 3.247344  | 1.570755  | 2.077318  |
| H | 3.042175  | 2.975531  | -0.642481 |
| H | 1.023579  | 2.180881  | 1.581915  |
| H | 0.579132  | 3.445880  | -1.187267 |
| H | -1.173760 | 1.917417  | 0.873572  |
| H | -1.907248 | 3.020897  | -1.903069 |
| H | -3.914840 | -3.279096 | 0.361707  |
| H | -3.519878 | -3.417027 | -1.355139 |
| H | -4.997222 | -2.572677 | -0.854315 |
| H | 3.855393  | -2.480512 | -0.846806 |
| H | 4.763564  | -1.516138 | 1.303708  |
| H | 3.265068  | -0.586863 | 1.449472  |
| H | 3.909277  | 0.310952  | -0.964069 |
| H | 5.392667  | 2.061762  | -0.074690 |
| H | 5.595597  | 1.155938  | 1.436947  |
| H | 0.081657  | 0.360890  | -1.868230 |
| H | -0.031281 | -1.128969 | -2.810509 |
| H | -1.497722 | -0.231239 | -2.380316 |
| H | 2.429883  | -3.832659 | 0.457052  |
| H | 6.142018  | 0.074965  | -1.357615 |

-----

**6**

$G_{\text{water}} = -1118.583634$  Hartree

-----

|   |           |           |           |
|---|-----------|-----------|-----------|
| C | 6.245788  | -0.829626 | 1.306347  |
| C | 5.218194  | -1.403899 | 0.326158  |
| C | 3.912978  | -0.614137 | 0.316659  |
| C | 2.769749  | -1.215527 | -0.518809 |
| C | 1.516632  | -0.282396 | -0.466468 |
| C | 0.289124  | -0.865113 | 0.212368  |
| C | -0.913717 | -0.669209 | -0.357368 |
| C | -2.280709 | -0.912494 | 0.222192  |
| C | -2.829901 | 0.340727  | 1.018027  |
| C | -2.785650 | 1.670281  | 0.281151  |
| C | -1.693012 | 2.441890  | 0.124438  |
| C | -0.373955 | 2.023884  | 0.587178  |
| C | 0.770928  | 2.106516  | -0.107654 |
| C | 1.879585  | 1.143103  | 0.179477  |
| C | 3.231525  | 1.602004  | -0.339476 |
| C | 3.179885  | -1.481370 | -1.975110 |
| C | -3.272094 | -1.381744 | -0.872188 |
| C | -4.645207 | -1.705679 | -0.261910 |
| C | -5.231544 | -0.526680 | 0.518284  |
| C | -4.241204 | 0.012999  | 1.561406  |
| C | 0.474875  | -1.435383 | 1.597929  |
| O | 3.450885  | 2.669882  | -0.859672 |
| O | 4.241197  | 0.703125  | -0.192773 |
| O | -3.373097 | -0.453098 | -1.945214 |
| O | -5.591271 | 0.465745  | -0.467437 |
| H | 6.476940  | 0.209283  | 1.052530  |
| H | 7.177179  | -1.405220 | 1.281209  |
| H | 5.865712  | -0.850219 | 2.335452  |
| H | 5.635422  | -1.409464 | -0.686538 |
| H | 4.983337  | -2.445282 | 0.584274  |
| H | 3.571358  | -0.506827 | 1.357517  |
| H | 2.522835  | -2.178745 | -0.056601 |
| H | 1.237619  | -0.048354 | -1.499026 |
| H | -0.945711 | -0.185669 | -1.331299 |
| H | -2.236600 | -1.723916 | 0.963511  |
| H | -2.172193 | 0.427812  | 1.892082  |
| H | -3.710974 | 2.000326  | -0.180372 |
| H | -1.763670 | 3.343671  | -0.482493 |
| H | -0.365085 | 1.415260  | 1.489925  |
| H | 0.834500  | 2.665781  | -1.038385 |
| H | 1.984018  | 0.993895  | 1.262774  |
| H | 3.523248  | -0.560193 | -2.458703 |
| H | 2.323817  | -1.863844 | -2.541306 |
| H | 3.983683  | -2.221030 | -2.045549 |
| H | -2.861659 | -2.297828 | -1.316150 |
| H | -4.548778 | -2.559593 | 0.420750  |

|   |           |           |           |
|---|-----------|-----------|-----------|
| H | -5.339768 | -1.992138 | -1.058933 |
| H | -6.146258 | -0.854249 | 1.036264  |
| H | -4.150333 | -0.753603 | 2.343394  |
| H | -4.668372 | 0.899502  | 2.051595  |
| H | -0.453303 | -1.837479 | 2.010945  |
| H | 0.835045  | -0.666691 | 2.297757  |
| H | 1.218659  | -2.241373 | 1.616592  |
| H | -4.050223 | 0.198918  | -1.693124 |
| H | -5.915759 | 1.253146  | -0.003114 |

7

$G_{\text{water}} = -1118.579852$  Hartree

|   |           |           |           |
|---|-----------|-----------|-----------|
| O | 1.964748  | -2.324614 | -1.500148 |
| O | 4.538944  | -1.109038 | 2.398866  |
| O | -2.901642 | 2.324491  | 1.935865  |
| C | 2.892810  | -1.398307 | -0.945877 |
| C | 3.229219  | -1.720605 | 0.513434  |
| C | 4.311514  | -0.777245 | 1.031465  |
| C | 3.874892  | 0.680977  | 0.860433  |
| C | 3.442051  | 1.015131  | -0.590859 |
| C | 2.988213  | 2.447847  | -0.672911 |
| C | 1.707539  | 2.807003  | -0.770367 |
| C | 0.554321  | 1.836124  | -0.825480 |
| C | 0.992033  | 0.344132  | -0.456093 |
| C | 2.357309  | 0.037807  | -1.122700 |
| C | -0.563314 | 2.190793  | 0.114250  |
| C | -1.827736 | 1.832468  | -0.140816 |
| C | -2.791750 | 1.614050  | 0.962196  |
| C | -0.168077 | -0.598494 | -0.737161 |
| C | -0.529172 | -0.873740 | -2.176923 |
| C | -0.955480 | -0.947781 | 0.294838  |
| C | -2.318652 | -1.604686 | 0.262470  |
| C | -2.601832 | -2.316526 | 1.594611  |
| C | -3.427538 | -0.571637 | -0.102976 |
| C | -4.828223 | -1.175578 | -0.221210 |
| C | -5.847330 | -0.184275 | -0.790114 |
| O | -3.549441 | 0.474104  | 0.898778  |
| H | 2.255356  | -3.216736 | -1.256219 |
| H | 5.216111  | -0.504608 | 2.741411  |
| H | 3.833621  | -1.445343 | -1.525522 |
| H | 2.333005  | -1.633211 | 1.138037  |
| H | 3.584992  | -2.756259 | 0.599911  |
| H | 5.231159  | -0.944839 | 0.441497  |
| H | 4.690438  | 1.355093  | 1.159021  |

|   |           |           |           |
|---|-----------|-----------|-----------|
| H | 3.046350  | 0.869367  | 1.552851  |
| H | 4.330855  | 0.897255  | -1.230081 |
| H | 3.762350  | 3.212325  | -0.618083 |
| H | 1.442769  | 3.862422  | -0.818527 |
| H | 0.162592  | 1.821975  | -1.853509 |
| H | 1.146458  | 0.345889  | 0.628517  |
| H | 2.255401  | 0.212145  | -2.201976 |
| H | -0.290801 | 2.499733  | 1.122895  |
| H | -2.084789 | 1.476937  | -1.132529 |
| H | -1.001606 | 0.003548  | -2.643403 |
| H | -1.234390 | -1.704851 | -2.266280 |
| H | 0.352307  | -1.128564 | -2.767887 |
| H | -0.641600 | -0.636037 | 1.291741  |
| H | -2.350746 | -2.346751 | -0.547734 |
| H | -2.701031 | -1.583598 | 2.402731  |
| H | -3.522017 | -2.907383 | 1.557223  |
| H | -1.777551 | -2.992845 | 1.845020  |
| H | -3.167595 | -0.131004 | -1.071114 |
| H | -5.153453 | -1.512211 | 0.769087  |
| H | -4.764510 | -2.066184 | -0.860514 |
| H | -5.561548 | 0.143442  | -1.797831 |
| H | -6.843051 | -0.635990 | -0.855022 |
| H | -5.914726 | 0.701990  | -0.151861 |

## 8

$G_{\text{water}} = -1118.593862$  Hartree

|   |           |           |           |
|---|-----------|-----------|-----------|
| C | -3.383753 | -1.572376 | -0.548189 |
| C | -4.782891 | -1.560937 | 0.088163  |
| C | -5.261990 | -0.142499 | 0.405193  |
| C | -4.239861 | 0.610418  | 1.261441  |
| C | -2.828535 | 0.632174  | 0.643688  |
| C | -2.345673 | -0.838167 | 0.345869  |
| H | -5.493260 | -2.043360 | -0.592048 |
| H | -4.769342 | -2.137377 | 1.022059  |
| H | -3.049739 | -2.612109 | -0.654107 |
| H | -4.588385 | 1.639124  | 1.436183  |
| H | -4.198219 | 0.130924  | 2.250297  |
| H | -2.874932 | 1.140717  | -0.327466 |
| H | -2.304946 | -1.371111 | 1.305897  |
| H | -6.224486 | -0.188021 | 0.937430  |
| O | -5.463663 | 0.515939  | -0.864397 |
| H | -5.609806 | 1.460492  | -0.698802 |
| O | -3.410992 | -1.041207 | -1.869586 |
| H | -4.049267 | -0.304504 | -1.861006 |

|   |           |           |           |
|---|-----------|-----------|-----------|
| C | -1.001041 | -0.800701 | -0.320954 |
| H | -1.062503 | -0.563454 | -1.380656 |
| C | -1.866998 | 1.363383  | 1.542978  |
| H | -2.018778 | 1.219798  | 2.614068  |
| C | 0.213657  | -0.855181 | 0.246694  |
| C | 0.458450  | -1.149189 | 1.707629  |
| H | 1.160797  | -1.982465 | 1.840226  |
| H | -0.460026 | -1.408471 | 2.237978  |
| H | 0.892269  | -0.283428 | 2.225001  |
| C | 1.412033  | -0.429967 | -0.583349 |
| C | 1.735408  | 1.094753  | -0.260777 |
| C | 2.685436  | -1.321999 | -0.443060 |
| H | 1.108767  | -0.446408 | -1.635347 |
| H | 1.740999  | 1.199662  | 0.832292  |
| C | 3.743231  | -0.588239 | 0.397279  |
| H | 2.421140  | -2.234456 | 0.104681  |
| H | 3.299735  | -0.317331 | 1.366956  |
| C | -0.805031 | 2.078074  | 1.144523  |
| H | -0.137718 | 2.474121  | 1.912114  |
| C | 3.214902  | -1.737343 | -1.824378 |
| H | 2.424485  | -2.240592 | -2.391459 |
| H | 3.544152  | -0.866179 | -2.400911 |
| H | 4.060034  | -2.428518 | -1.746456 |
| C | 5.036292  | -1.352491 | 0.662287  |
| H | 4.769897  | -2.336820 | 1.070072  |
| H | 5.547973  | -1.526251 | -0.290461 |
| C | 5.970424  | -0.611396 | 1.623940  |
| H | 5.494879  | -0.463365 | 2.601640  |
| H | 6.897135  | -1.172953 | 1.783005  |
| H | 6.229561  | 0.372757  | 1.222087  |
| O | 4.126235  | 0.633407  | -0.285504 |
| C | 3.140286  | 1.458433  | -0.724230 |
| O | 3.419405  | 2.405398  | -1.421094 |
| C | 0.702439  | 2.005389  | -0.859498 |
| H | 0.888956  | 2.306052  | -1.887362 |
| C | -0.437633 | 2.373453  | -0.259698 |
| H | -1.162165 | 2.941689  | -0.844553 |

9

$G_{\text{water}} = -1118.575181$  Hartree

|   |           |           |           |
|---|-----------|-----------|-----------|
| C | -3.089137 | -1.296908 | -0.702882 |
| C | -4.405084 | -1.690792 | -0.007788 |
| C | -5.181752 | -0.474818 | 0.508784  |
| C | -4.304807 | 0.429112  | 1.387305  |

|   |           |           |           |
|---|-----------|-----------|-----------|
| C | -3.022796 | 0.847499  | 0.657542  |
| C | -2.225334 | -0.418169 | 0.228264  |
| H | -5.034655 | -2.250607 | -0.707966 |
| H | -4.185689 | -2.348432 | 0.842825  |
| H | -2.524322 | -2.209496 | -0.933686 |
| H | -4.879238 | 1.316495  | 1.693317  |
| H | -4.053691 | -0.110257 | 2.311596  |
| H | -3.327703 | 1.358666  | -0.269081 |
| H | -2.075020 | -0.993853 | 1.148652  |
| H | -6.056376 | -0.813964 | 1.084295  |
| O | -5.639512 | 0.231453  | -0.665240 |
| H | -6.021260 | 1.078383  | -0.385747 |
| O | -3.319374 | -0.659265 | -1.957113 |
| H | -4.122829 | -0.118153 | -1.851706 |
| C | -0.838605 | -0.110991 | -0.404489 |
| H | -0.883274 | -0.391756 | -1.460999 |
| C | -2.132848 | 1.782447  | 1.434056  |
| H | -2.466994 | 2.179571  | 2.391022  |
| C | 0.328430  | -0.849782 | 0.237815  |
| C | 0.347366  | -0.997915 | 1.742451  |
| H | -0.404625 | -1.717727 | 2.091280  |
| H | 0.109352  | -0.044587 | 2.229313  |
| H | 1.313797  | -1.342378 | 2.117396  |
| C | 1.377081  | -1.190175 | -0.532443 |
| C | 1.886897  | 1.664030  | -0.284100 |
| C | 2.744466  | -1.682836 | -0.100015 |
| H | 1.289738  | -1.005292 | -1.603453 |
| H | 1.839291  | 1.474614  | 0.783200  |
| C | 3.618143  | -0.520022 | 0.463954  |
| H | 2.631651  | -2.382677 | 0.739453  |
| H | 3.051339  | -0.022308 | 1.257930  |
| C | -0.939431 | 2.086920  | 0.912393  |
| H | -0.234434 | 2.750548  | 1.407173  |
| C | 3.438564  | -2.418613 | -1.256830 |
| H | 2.785681  | -3.203525 | -1.653182 |
| H | 3.667245  | -1.719881 | -2.068484 |
| H | 4.374673  | -2.887967 | -0.939977 |
| C | 4.953073  | -0.978130 | 1.056297  |
| H | 4.756063  | -1.811061 | 1.744268  |
| H | 5.584175  | -1.367925 | 0.250406  |
| C | 5.686673  | 0.151233  | 1.785542  |
| H | 5.089115  | 0.536100  | 2.621826  |
| H | 6.643323  | -0.196530 | 2.189923  |
| H | 5.885566  | 0.981213  | 1.100923  |
| O | 3.971639  | 0.443933  | -0.560004 |
| C | 3.173828  | 1.469370  | -0.993459 |



|   |           |          |           |
|---|-----------|----------|-----------|
| O | 3.527385  | 2.099392 | -1.964292 |
| C | 0.756361  | 1.799979 | -0.988723 |
| H | 0.838220  | 1.916671 | -2.067886 |
| C | -0.597582 | 1.495317 | -0.432934 |
| H | -1.351260 | 1.841486 | -1.153885 |

-----

**TS-1**

$G_{\text{water}} = -1118.516518$  Hartree

Imaginary frequency:  $-372.3 \text{ cm}^{-1}$

-----

|   |             |             |             |
|---|-------------|-------------|-------------|
| C | -6.01009900 | -0.37007400 | -1.62776500 |
| C | -5.19958800 | -1.17886400 | -0.61061700 |
| C | -3.83469100 | -0.54999000 | -0.32202600 |
| C | -2.89993000 | -1.43805100 | 0.55202500  |
| C | -1.51059700 | -0.86353900 | 0.72980100  |
| C | -0.38187100 | -1.14622300 | 0.00098100  |
| C | 0.88671100  | -0.69130500 | 0.48406000  |
| C | 2.14781100  | -1.03061400 | -0.02224800 |
| C | 2.94217000  | 0.54122400  | -1.24705800 |
| C | 2.87172600  | 1.75272600  | -0.53439500 |
| C | 1.67351200  | 2.37900600  | -0.17979200 |
| C | 0.42318600  | 1.92236500  | -0.57503700 |
| C | -0.80759500 | 2.25276400  | 0.03188100  |
| C | -1.95223200 | 1.58883500  | -0.31309900 |
| C | -3.18292100 | 1.69900700  | 0.47666900  |
| C | -3.51233600 | -1.71927700 | 1.93669000  |
| C | 3.28781800  | -1.22894300 | 0.99050100  |
| C | 4.63336300  | -1.57378300 | 0.32951100  |
| C | 5.22704800  | -0.48866300 | -0.56771100 |
| C | 4.27729500  | -0.03473300 | -1.68995300 |
| C | -0.43320800 | -1.91319400 | -1.30324900 |
| O | -3.42020100 | 2.58914500  | 1.26804600  |
| O | -4.11896800 | 0.70598200  | 0.32039700  |
| O | 3.38818100  | -0.16564500 | 1.92202100  |
| O | 5.60848900  | 0.59490400  | 0.30058100  |
| H | -6.17348600 | 0.64779000  | -1.26143300 |
| H | -6.98673900 | -0.83165800 | -1.80910800 |
| H | -5.48611100 | -0.30419200 | -2.58980600 |
| H | -5.76008200 | -1.25824400 | 0.32688700  |
| H | -5.03726400 | -2.20074700 | -0.97892200 |
| H | -3.34021900 | -0.37671000 | -1.28652400 |
| H | -2.82383200 | -2.38910600 | 0.00795800  |
| H | -1.36827500 | -0.29273800 | 1.64483300  |
| H | 0.88632700  | -0.14667700 | 1.42486900  |
| H | 2.16534900  | -1.76370600 | -0.83123000 |

|   |             |             |             |
|---|-------------|-------------|-------------|
| H | 2.14096500  | 0.35018500  | -1.95510800 |
| H | 3.78366900  | 2.14013200  | -0.09200600 |
| H | 1.71715500  | 3.19359100  | 0.54213500  |
| H | 0.37018900  | 1.21749400  | -1.40082200 |
| H | -0.82745600 | 2.91967600  | 0.89193100  |
| H | -1.94211100 | 0.95709500  | -1.19113000 |
| H | -3.71258600 | -0.77978800 | 2.46210000  |
| H | -2.82149800 | -2.31327600 | 2.54405400  |
| H | -4.45298100 | -2.27266400 | 1.85914800  |
| H | 3.00758900  | -2.10530500 | 1.59274900  |
| H | 4.51112700  | -2.48529300 | -0.26998800 |
| H | 5.35725900  | -1.79594800 | 1.12099300  |
| H | 6.13281500  | -0.89723200 | -1.04323300 |
| H | 4.10311100  | -0.90292500 | -2.33812400 |
| H | 4.80490200  | 0.70390300  | -2.31417700 |
| H | 0.11407700  | -2.86206100 | -1.23618200 |
| H | 0.03451800  | -1.33419800 | -2.11025700 |
| H | -1.45504200 | -2.13880700 | -1.61639200 |
| H | 3.97499800  | 0.50325900  | 1.53014100  |
| H | 5.99620900  | 1.29923300  | -0.24237600 |

-----

## TS-2

$G_{\text{water}} = -1118.544415$  Hartree

Imaginary frequency:  $-269.5 \text{ cm}^{-1}$

-----

|   |             |             |             |
|---|-------------|-------------|-------------|
| C | -6.08939000 | -0.48829600 | -1.54669400 |
| C | -5.21959600 | -1.22154000 | -0.52099300 |
| C | -3.85736000 | -0.55404300 | -0.33118200 |
| C | -2.86043200 | -1.36406000 | 0.54718100  |
| C | -1.50063000 | -0.69755400 | 0.66247800  |
| C | -0.35787700 | -0.98794800 | -0.07907000 |
| C | 0.84947000  | -0.35564200 | 0.27778300  |
| C | 2.20319000  | -0.74121200 | -0.25984500 |
| C | 2.93342000  | 0.35146700  | -1.15054900 |
| C | 2.92435000  | 1.71450600  | -0.51799200 |
| C | 1.76478700  | 2.34520100  | -0.25370600 |
| C | 0.48413800  | 1.75961900  | -0.61208600 |
| C | -0.72669300 | 2.10601000  | -0.00470000 |
| C | -1.90188600 | 1.45675900  | -0.33408000 |
| C | -3.13992300 | 1.66540400  | 0.42938900  |
| C | -3.42203900 | -1.62585000 | 1.95619100  |
| C | 3.10707500  | -1.19557200 | 0.92621100  |
| C | 4.47459800  | -1.69277400 | 0.43018300  |
| C | 5.20907800  | -0.64787500 | -0.41012600 |
| C | 4.33144700  | -0.15136300 | -1.56668600 |

|   |             |             |             |
|---|-------------|-------------|-------------|
| C | -0.44019600 | -1.76421400 | -1.37887300 |
| O | -3.33310300 | 2.57208200  | 1.21254000  |
| O | -4.13159000 | 0.73121700  | 0.25393800  |
| O | 3.23866200  | -0.19375600 | 1.92288900  |
| O | 5.57685600  | 0.41549700  | 0.49247800  |
| H | -6.25543000 | 0.54688400  | -1.23388400 |
| H | -7.06415500 | -0.97560300 | -1.65653800 |
| H | -5.60928000 | -0.47121300 | -2.53334500 |
| H | -5.73655900 | -1.25391300 | 0.44386300  |
| H | -5.05323800 | -2.26078900 | -0.83515900 |
| H | -3.40936200 | -0.42284300 | -1.32561700 |
| H | -2.74334600 | -2.32877000 | 0.03571100  |
| H | -1.33711800 | -0.18047900 | 1.60447200  |
| H | 0.89397200  | 0.10126500  | 1.26081200  |
| H | 2.09594500  | -1.61397200 | -0.91850800 |
| H | 2.33852200  | 0.40168500  | -2.07335700 |
| H | 3.86553500  | 2.15099900  | -0.20014400 |
| H | 1.76148600  | 3.27538900  | 0.31272500  |
| H | 0.42654000  | 1.25003400  | -1.57237800 |
| H | -0.72028800 | 2.72421700  | 0.89164900  |
| H | -1.96119300 | 0.93178600  | -1.27977000 |
| H | -3.66509600 | -0.68018000 | 2.45186100  |
| H | -2.68340900 | -2.15456300 | 2.56778800  |
| H | -4.32941400 | -2.23628300 | 1.92302500  |
| H | 2.59477500  | -2.03026900 | 1.42053500  |
| H | 4.33687000  | -2.59363400 | -0.18156500 |
| H | 5.09086600  | -1.96538800 | 1.29349900  |
| H | 6.12629100  | -1.09418100 | -0.82471900 |
| H | 4.21538600  | -0.98913300 | -2.26792600 |
| H | 4.85859500  | 0.63912200  | -2.11969800 |
| H | 0.12358300  | -2.70456800 | -1.33026800 |
| H | -0.01756900 | -1.18292300 | -2.20891200 |
| H | -1.46820100 | -2.01437500 | -1.65144700 |
| H | 3.94138400  | 0.41180500  | 1.62767100  |
| H | 6.00758700  | 1.11621800  | -0.02139700 |

-----

### TS-3

$G_{\text{water}} = -1118.516568$  Hartree

Imaginary frequency:  $-378.5 \text{ cm}^{-1}$

-----

|   |             |             |             |
|---|-------------|-------------|-------------|
| C | -3.41351700 | -1.29077100 | -0.88130800 |
| C | -4.75838800 | -1.43550000 | -0.14962200 |
| C | -5.26631300 | -0.16666600 | 0.53590700  |
| C | -4.27531300 | 0.43582200  | 1.53917200  |
| C | -2.95833400 | 0.85015500  | 0.91992500  |

|   |             |             |             |
|---|-------------|-------------|-------------|
| C | -2.24077300 | -0.98571400 | 0.06229400  |
| H | -5.51387700 | -1.75889400 | -0.87458400 |
| H | -4.67070400 | -2.22610800 | 0.60630200  |
| H | -3.19921300 | -2.26972000 | -1.33488100 |
| H | -4.75232800 | 1.31502600  | 2.00380200  |
| H | -4.11115700 | -0.27787900 | 2.35781300  |
| H | -3.04487000 | 1.24275300  | -0.08816200 |
| H | -2.27846400 | -1.53962900 | 1.00004000  |
| H | -6.20074100 | -0.40600100 | 1.06651600  |
| O | -5.55884500 | 0.76925100  | -0.52365600 |
| H | -5.77519400 | 1.62884200  | -0.12931200 |
| O | -3.47485900 | -0.37365200 | -1.96863700 |
| H | -4.15672700 | 0.28586600  | -1.74638800 |
| C | -0.97868400 | -0.79043300 | -0.50885400 |
| H | -0.95974300 | -0.48835300 | -1.55323900 |
| C | -1.93016100 | 1.36754100  | 1.71661000  |
| H | -1.98748900 | 1.21792400  | 2.79472600  |
| C | 0.27400400  | -1.09278100 | 0.11123200  |
| C | 0.27932300  | -1.55421000 | 1.55525300  |
| H | -0.15745600 | -2.55710000 | 1.65570700  |
| H | -0.31484800 | -0.87842400 | 2.17853100  |
| H | 1.28704500  | -1.58749800 | 1.97644100  |
| C | 1.43122300  | -0.99012700 | -0.62594700 |
| C | 1.90601100  | 1.59550200  | -0.21965000 |
| C | 2.79952700  | -1.53339100 | -0.26955000 |
| H | 1.32600300  | -0.66448400 | -1.65834300 |
| H | 1.88182200  | 1.24590200  | 0.80250800  |
| C | 3.73256700  | -0.48534200 | 0.40576800  |
| H | 2.67890000  | -2.32904500 | 0.47799600  |
| H | 3.20861600  | -0.07330700 | 1.27783200  |
| C | -0.73555200 | 1.85845500  | 1.18502200  |
| H | 0.09312100  | 2.01403400  | 1.87443400  |
| C | 3.44674400  | -2.14219500 | -1.52731700 |
| H | 2.76030200  | -2.85031500 | -2.00315400 |
| H | 3.68730300  | -1.35629000 | -2.25065600 |
| H | 4.37021500  | -2.67822500 | -1.28839200 |
| C | 5.06484800  | -1.05699300 | 0.89427300  |
| H | 4.85635200  | -1.95538200 | 1.49065400  |
| H | 5.65554200  | -1.37355800 | 0.02812000  |
| C | 5.86424900  | -0.04490400 | 1.72057900  |
| H | 5.30859800  | 0.26249500  | 2.61564500  |
| H | 6.81885800  | -0.47037800 | 2.04838300  |
| H | 6.07226900  | 0.85084500  | 1.12784900  |
| O | 4.07944200  | 0.57122400  | -0.50818200 |
| C | 3.16116500  | 1.48303500  | -0.97095500 |
| O | 3.43306300  | 2.11246700  | -1.97307900 |

|   |             |            |             |
|---|-------------|------------|-------------|
| C | 0.77669000  | 2.12146000 | -0.78697900 |
| H | 0.84099000  | 2.43011400 | -1.82814100 |
| C | -0.49914200 | 2.06242500 | -0.17621600 |
| H | -1.35416800 | 2.17344400 | -0.83869600 |

-----

**TS-4**

$G_{\text{water}} = -1118.543914$  Hartree

Imaginary frequency:  $-276.6 \text{ cm}^{-1}$

-----

|   |             |             |             |
|---|-------------|-------------|-------------|
| C | -3.24844000 | -1.28513100 | -0.82531400 |
| C | -4.59531000 | -1.61598700 | -0.16038800 |
| C | -5.24654500 | -0.39002700 | 0.48387700  |
| C | -4.28350800 | 0.31509300  | 1.44557300  |
| C | -2.95285100 | 0.68414500  | 0.77412200  |
| C | -2.27337900 | -0.61819200 | 0.18896700  |
| H | -5.27406400 | -2.03680500 | -0.91034600 |
| H | -4.44261400 | -2.37631900 | 0.61586300  |
| H | -2.78928200 | -2.22025600 | -1.16861500 |
| H | -4.76258800 | 1.21927200  | 1.84923000  |
| H | -4.09808700 | -0.34378900 | 2.30596800  |
| H | -3.18006900 | 1.30955000  | -0.09945900 |
| H | -2.17136500 | -1.30695600 | 1.03699100  |
| H | -6.15401600 | -0.69582200 | 1.02621300  |
| O | -5.62418500 | 0.48169000  | -0.60435000 |
| H | -5.90533600 | 1.33284900  | -0.23338000 |
| O | -3.41231100 | -0.48321800 | -1.98943500 |
| H | -4.16055100 | 0.11612000  | -1.81322500 |
| C | -0.92707000 | -0.42111600 | -0.45844300 |
| H | -0.96569300 | -0.25851700 | -1.53060800 |
| C | -2.01903600 | 1.41822300  | 1.68496400  |
| H | -2.24462600 | 1.45026300  | 2.74960300  |
| C | 0.27117500  | -0.93118500 | 0.08185800  |
| C | 0.30904100  | -1.40277100 | 1.52390500  |
| H | 1.32667900  | -1.59096600 | 1.87350500  |
| H | -0.25753900 | -2.33353900 | 1.65863600  |
| H | -0.13486700 | -0.65416800 | 2.18823500  |
| C | 1.44287500  | -0.82828900 | -0.66514900 |
| C | 1.85066000  | 1.49352600  | -0.16596100 |
| C | 2.78497300  | -1.46180700 | -0.34305500 |
| H | 1.32411400  | -0.53721600 | -1.70586300 |
| H | 1.82652300  | 1.24322800  | 0.88827000  |
| C | 3.72539200  | -0.50477200 | 0.44525300  |
| H | 2.62094700  | -2.32051600 | 0.32191600  |
| H | 3.19100600  | -0.16026900 | 1.34090500  |
| C | -0.86173500 | 1.91892700  | 1.21111900  |

|   |             |             |             |
|---|-------------|-------------|-------------|
| H | -0.12105500 | 2.33973300  | 1.89010400  |
| C | 3.44119000  | -1.96805600 | -1.63965500 |
| H | 2.74672800  | -2.61155300 | -2.19012200 |
| H | 3.71509500  | -1.12665100 | -2.28441100 |
| H | 4.34581900  | -2.54863900 | -1.43598100 |
| C | 5.03807900  | -1.14172400 | 0.90064600  |
| H | 4.80147900  | -2.08118800 | 1.41804900  |
| H | 5.63393300  | -1.39954500 | 0.01860600  |
| C | 5.84720700  | -0.21918700 | 1.81728300  |
| H | 5.28455100  | 0.02861000  | 2.72628100  |
| H | 6.78619500  | -0.69315300 | 2.12281000  |
| H | 6.08548000  | 0.71604400  | 1.30200900  |
| O | 4.09771000  | 0.62410900  | -0.36560000 |
| C | 3.15008000  | 1.48944200  | -0.85449300 |
| O | 3.42836600  | 2.16385000  | -1.82425700 |
| C | 0.72035700  | 2.00685800  | -0.77492300 |
| H | 0.80844900  | 2.26753200  | -1.82743600 |
| C | -0.55714800 | 1.90007000  | -0.21683600 |
| H | -1.38986200 | 2.13818200  | -0.87643800 |

-----

## References

37. Frisch, M. J. *et al.* GAUSSIAN 09, Revision D.01 (Gaussian Inc., 2013).
38. Grimme, S., Antony, J., Ehrlich, S. & Krieg, H. A consistent and accurate ab initio parametrization of density functional dispersion correction (DFT-D) for the 94 elements H-Pu. *J. Chem. Phys.* **132**, 154104 (2010).
39. Zhao, Y. & Truhlar, D. G. The M06 suite of density functionals for main group thermochemistry, thermochemical kinetics, noncovalent interactions, excited states, and transition elements: two new functionals and systematic testing of four M06-class functionals and 12 other functionals. *Theor. Chem. Acc.* **120**, 215–241 (2008).
40. Barone, V. & Cossi, M. Quantum calculation of molecular energies and energy gradients in solution by a conductor solvent model. *J. Phys. Chem. A* **102**, 1995–2001 (1998).
41. Cossi, M., Rega, N., Scalmani, G. & Barone, V. Energies, Structures, and electronic properties of molecules in solution with the C-PCM solvation model. *J. Comput. Chem.* **24**, 669–681 (2003).
42. Trott, O. & Olson, A. J. AutoDock Vina: improving the speed and accuracy of docking with a new scoring function, efficient optimization and multithreading. *J. Comput. Chem.* **31**, 455–461 (2010).
43. Case, D. A. *et al.* AmberTools 16, University of California, San Francisco (2016).
44. Bayly, C. I., Cieplak, P., Cornell, W. & Kollman, P. A. A well-behaved electrostatic potentialbased method using charge restraints for deriving atomic charges: the RESP model. *J. Phys.Chem.* **97**, 10269–10280 (1993).
45. Lindorff-Larsen, K. *et al.* Improved side-chain torsion potentials for the Amber ff99SB protein force field. *Proteins* **78**, 1950–1958 (2010).
46. Wang, J. *et al.* Development and testing of a general AMBER force field. *J. Comput. Chem.* **25**, 1157–1174 (2004).
47. Bierman, M. *et al.* Plasmid cloning vectors for the conjugal transfer of DNA from *Escherichia coli* to *Streptomyces* spp. *Gene* **116**, 43–49 (1992).
48. Li, L. *et al.* Engineered jadomycin analogues with altered sugar moieties revealing JadS as a substrate flexible *O*-glycosyltransferase. *Appl. Microbiol. Biot.* **101**, 5291–5300 (2017).
49. Green, M. R. & Sambrook, J. *Molecular cloning: a laboratory manual* 4th ed (Cold Spring Harbor Laboratory Press, 2012).
